# Supplementary material for: Lewis base-catalyzed reactions of cyclopropenones: novel synthesis of mono- or multi-substituted allenic esters
Source: Royal Society of Chemistry journal article supplement (doi:10.1039/c3cc46470a), 2013-10-26
Supplement: c3cc46470a.pdf [file c3cc46470a.pdf]

# Lewis Base-catalyzed Reactions of Cyclopropenones: Novel Synthesis of Mono- or Multi-substituted Allenic Esters

Yuan-Liang Yang, Zhen Zhang, Xiao-Nan Zhang, Dei Wang, Yin Wei,\* Min Shi\*

*State Key Laboratory of Organometallic Chemistry, Shanghai Institute of Organic Chemistry,  
Chinese Academy of Sciences, 345 Lingling Road, Shanghai 200032, China.  
[weiyin@mail.sioc.ac.cn](mailto:weiyin@mail.sioc.ac.cn); [mshi@mail.sioc.ac.cn](mailto:mshi@mail.sioc.ac.cn). Fax: 86-21-64166128.*

## CONTENTS

|                                                                                    |     |
|------------------------------------------------------------------------------------|-----|
| 1. General Remarks and Procedures for the Preparation of Substrates <b>2</b> ..... | S2  |
| 2. Reference.....                                                                  | S48 |
| 3. General Procedure and Spectroscopic Data of the Products <b>3</b> .....         | S50 |
| 4. General Procedure and Spectroscopic Data of the Products <b>4</b> .....         | S67 |
| 5. HPLC Spectra.....                                                               | S81 |
| 6. X-ray Structure of <b>3j</b> .....                                              | S86 |
| 7. Calculation Results for the Stabilities of Zwitterionic Intermediates.....      | S87 |

**General Remarks:**  $^1\text{H}$  NMR spectra were recorded on a Bruker AM-400 spectrometer for solution in  $\text{CDCl}_3$  with tetramethylsilane (TMS) as internal standard; J-values are in Hz. Mass spectra were recorded with a HP-5989 instrument. All of the compounds reported in this paper gave satisfactory HRMS analytic data. Melting points were determined on a digital melting point apparatus and temperatures were uncorrected. Optical rotations were determined at 589 nm (sodium D line) by using a Perkin-Elmer-341 MC digital polarimeter;  $[\alpha]_{\text{D}}$ -values are given in unit of  $10 \text{ deg}^{-1} \text{ cm}^2 \text{ g}^{-1}$ . Infrared spectra were recorded on a Perkin-Elmer PE-983 spectrometer with absorption in  $\text{cm}^{-1}$ . Chiral HPLC was performed on a SHIMADZU SPD-10A vp series with chiral columns (Chiralpak AD-H, IC-H columns  $4.6 \times 250 \text{ mm}$ , (Daicel Chemical Ind., Ltd.)). THF, toluene and  $\text{Et}_2\text{O}$  were distilled from sodium (Na) under argon (Ar) atmosphere.  $\text{CH}_3\text{CN}$ , 1,2-dichloroethane and dichloromethane were distilled from  $\text{CaH}_2$  under argon (Ar) atmosphere. Commercially obtained reagents were used without further purification. All reactions were monitored by TLC with Huanghai GF254 silica gel coated plates. Flash column chromatography was carried out using 300-400 mesh silica gel at increased pressure.

**Table S.** Preparation of various substrates **2**.

| Entry | R <sup>1</sup> /R <sup>2</sup> /R <sup>3</sup> /R <sup>4</sup>                                        | yield (two steps%) <sup>a</sup> |
|-------|-------------------------------------------------------------------------------------------------------|---------------------------------|
| 1     | C <sub>6</sub> H <sub>5</sub> /H/H/Ac ( <b>S1a</b> )                                                  | 50 ( <b>2a</b> )                |
| 2     | 4-MeOC <sub>6</sub> H <sub>4</sub> /H/H/Ac ( <b>S1b</b> )                                             | 47 ( <b>2b</b> )                |
| 3     | 4-NO <sub>2</sub> C <sub>6</sub> H <sub>4</sub> /H/H/Ac ( <b>S1c</b> )                                | 52 ( <b>2c</b> )                |
| 4     | 4- <sup>t</sup> BuC <sub>6</sub> H <sub>4</sub> /H/H/Ac ( <b>S1d</b> )                                | 10 ( <b>2d</b> )                |
| 5     | 4-ClC <sub>6</sub> H <sub>4</sub> /H/H/Ac ( <b>S1e</b> )                                              | 55 ( <b>2e</b> )                |
| 6     | 4-BrC <sub>6</sub> H <sub>4</sub> /H/H/Ac ( <b>S1f</b> )                                              | 57 ( <b>2f</b> )                |
| 7     | 3-FC <sub>6</sub> H <sub>4</sub> /H/H/Ac ( <b>S1g</b> )                                               | 55 ( <b>2g</b> )                |
| 8     | 3-BrC <sub>6</sub> H <sub>4</sub> /H/H/Ac ( <b>S1h</b> )                                              | 52 ( <b>2h</b> )                |
| 9     | 3-MeC <sub>6</sub> H <sub>4</sub> /H/H/Ac ( <b>S1i</b> )                                              | 54 ( <b>2i</b> )                |
| 10    | 2-CNC <sub>6</sub> H <sub>4</sub> /H/H/Ac ( <b>S1j</b> )                                              | 45 ( <b>2j</b> )                |
| 11    | 2-CO <sub>2</sub> MeC <sub>6</sub> H <sub>4</sub> /H/H/Ac ( <b>S1k</b> )                              | 60 ( <b>2k</b> )                |
| 12    | 2-MeOC <sub>6</sub> H <sub>4</sub> /H/H/Ac ( <b>S1l</b> )                                             | 36 ( <b>2l</b> )                |
| 13    | 1-naphthyl/H/H/Ac ( <b>S1m</b> )                                                                      | 55 ( <b>2m</b> )                |
| 14    | CH <sub>2</sub> C <sub>6</sub> H <sub>5</sub> /H/H/Ac ( <b>S1n</b> )                                  | 15 ( <b>2n</b> )                |
| 15    | 2-thienyl/H/H/Ac ( <b>S1o</b> )                                                                       | 45 ( <b>2o</b> )                |
| 16    | C <sub>6</sub> H <sub>5</sub> /C <sub>6</sub> H <sub>5</sub> /H/Ac ( <b>S1p</b> )                     | 59 ( <b>2p</b> )                |
| 17    | C <sub>6</sub> H <sub>5</sub> /4-ClC <sub>6</sub> H <sub>4</sub> /H/Ac ( <b>S1q</b> )                 | 56 ( <b>2q</b> )                |
| 18    | C <sub>6</sub> H <sub>5</sub> /2-naphthyl/H/Ac ( <b>S1r</b> )                                         | 52 ( <b>2r</b> )                |
| 19    | C <sub>6</sub> H <sub>5</sub> /1-naphthyl/H/Ac ( <b>S1s</b> )                                         | 40 ( <b>2s</b> )                |
| 20    | C <sub>6</sub> H <sub>5</sub> /9-phenanthryl/H/Ac ( <b>S1t</b> )                                      | 46 ( <b>2t</b> )                |
| 21    | C <sub>6</sub> H <sub>5</sub> /3-MeC <sub>6</sub> H <sub>4</sub> /H/Ac ( <b>S1u</b> )                 | 46 ( <b>2u</b> )                |
| 22    | C <sub>6</sub> H <sub>5</sub> /2-BrC <sub>6</sub> H <sub>4</sub> /H/Ac ( <b>S1v</b> )                 | 51 ( <b>2v</b> )                |
| 23    | C <sub>6</sub> H <sub>5</sub> /2,4-Cl <sub>2</sub> C <sub>6</sub> H <sub>3</sub> /H/Ac ( <b>S1w</b> ) | 58 ( <b>2w</b> )                |
| 24    | 4-ClC <sub>6</sub> H <sub>4</sub> /Me/H/Ac ( <b>S1x</b> )                                             | 53 ( <b>2x</b> )                |
| 25    | C <sub>6</sub> H <sub>5</sub> /(CH <sub>2</sub> ) <sub>5</sub> /Ac ( <b>S1y</b> )                     | 80 ( <b>2y</b> )                |
| 26    | C <sub>6</sub> H <sub>5</sub> /CH <sub>3</sub> /4-ClC <sub>6</sub> H <sub>4</sub> /Ac ( <b>S1z</b> )  | 45 ( <b>2z</b> )                |
| 27    | 4-BrC <sub>6</sub> H <sub>4</sub> /2-naphthyl/H/Ac ( <b>S1aa</b> )                                    | 38 ( <b>2aa</b> )               |
| 28    | 4-MeC <sub>6</sub> H <sub>4</sub> /2-naphthyl/H/Ac ( <b>S1bb</b> )                                    | 39 ( <b>2bb</b> )               |
| 29    | 3-MeC <sub>6</sub> H <sub>4</sub> /2-naphthyl/H/Ac ( <b>S1cc</b> )                                    | 30 ( <b>2cc</b> )               |
| 30    | C <sub>6</sub> H <sub>5</sub> /H/H/Ms ( <b>S1dd</b> )                                                 | 60 ( <b>2dd</b> )               |

<sup>a</sup>Isolated yield.

**Table S1.** Optimization of the reaction conditions.

| entry | catalyst | solvent           | NuH (equiv)             | yield <sup>a</sup> |
|-------|----------|-------------------|-------------------------|--------------------|
| 1     | DABCO    | toluene           | H <sub>2</sub> O (1.0)  | N.R                |
| 2     | DABCO    | MeCN              | H <sub>2</sub> O (1.0)  | N.R                |
| 3     | DABCO    | DCM               | H <sub>2</sub> O (1.0)  | N.R                |
| 4     | DABCO    | DMF               | H <sub>2</sub> O (1.0)  | N.D                |
| 5     | DABCO    | Et <sub>2</sub> O | H <sub>2</sub> O (1.0)  | N.R                |
| 6     | DABCO    | THF               | H <sub>2</sub> O (2.0)  | 38 ( <b>3a'</b> )  |
| 7     | DABCO    | THF               | H <sub>2</sub> O (5.0)  | 38 ( <b>3a'</b> )  |
| 8     | DABCO    | THF               | H <sub>2</sub> O (10.0) | 31 ( <b>3a'</b> )  |
| 9     | -        | THF               | H <sub>2</sub> O (1.0)  | N.R                |
| 10    | DABCO    | THF               | H <sub>2</sub> O (0.5)  | trace              |

<sup>a</sup>Isolated yield. Unless otherwise specified, to a mixture of **2a** (0.10 mmol) and catalyst (0.02 mmol) in solvent (1.0 mL) under Ar atmosphere at 0 °C was added NuH, then the resulting reaction mixtures were stirred at room temperature for 3 days.

We found that these solvents were not suitable for the reaction and the corresponding product **3a'** could not be obtained (Table S1, entries 1-5). The employed amount of H<sub>2</sub>O ranging from 0.50 to 10.0 equiv with respect to **2a** was also investigated and we found that the yield decreased along with the employed amount of H<sub>2</sub>O increasing (Table S1, entries 6-8). When the employed amount of H<sub>2</sub>O was reduced to 0.50 equiv, only trace amount of product was obtained (Table S1, entry 10). The control experiment indicated that the reaction did not take place in the absence of DABCO (Table S1, entry 9).

#### General Procedure for the Preparation of Substrates **2** using **2a** as an Example.

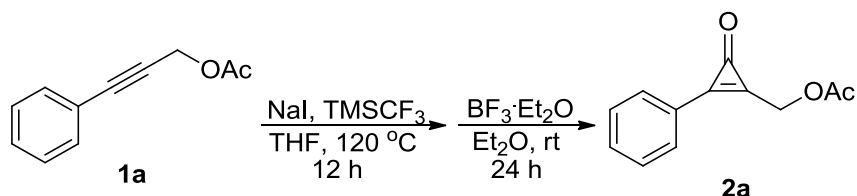

Following the previous literature,<sup>[1][2]</sup> **1a** (10.0 mmol), NaI (22.0 mmol), TMSCF<sub>3</sub> (20 mmol) and 20.0 mL THF were added to a pressure tube under Ar atmosphere, and the resulting mixture was conducted at 120 °C for 12 hours. On cooling to room temperature, the reaction solution was filtered by a celite and the filtrate was concentrated under reduced pressure for next step without further purification. Above intermediate was dissolved in 20.0 mL Et<sub>2</sub>O and 1.5 mL BF<sub>3</sub>·Et<sub>2</sub>O was added in

one portion, the resulting mixture was stirred at room temperature and monitored by TLC. After the intermediate was consumed, the reaction was quenched by addition of saturated  $\text{NaHCO}_3$  solution, extracted with  $\text{Et}_2\text{O}$ , dried over anhydrous  $\text{Na}_2\text{SO}_4$ . The solvent was removed under reduced pressure and the residue was purified by column chromatography on silica gel ( $\text{EtOAc/PE} = 1/2\sim 2/1$  as eluent) to furnish product **2a** as a yellow solid (1.02 g, 50% yield).

**(3-oxo-2-phenylcycloprop-1-enyl)methyl acetate 2a:**

This is a known compound.<sup>[2]</sup> A yellow solid.  $^1\text{H}$  NMR (400 MHz,  $\text{CDCl}_3$ , TMS):  $\delta$  7.85-7.83 (2H, m), 7.60-7.52 (3H, m), 5.30 (2H, s), 2.25 (3H, s);  $^{13}\text{C}$  NMR ( $\text{CDCl}_3$ , 100 MHz):  $\delta$  169.9, 154.1, 153.7, 149.6, 133.2, 131.7, 129.3, 122.7, 59.3, 20.7.

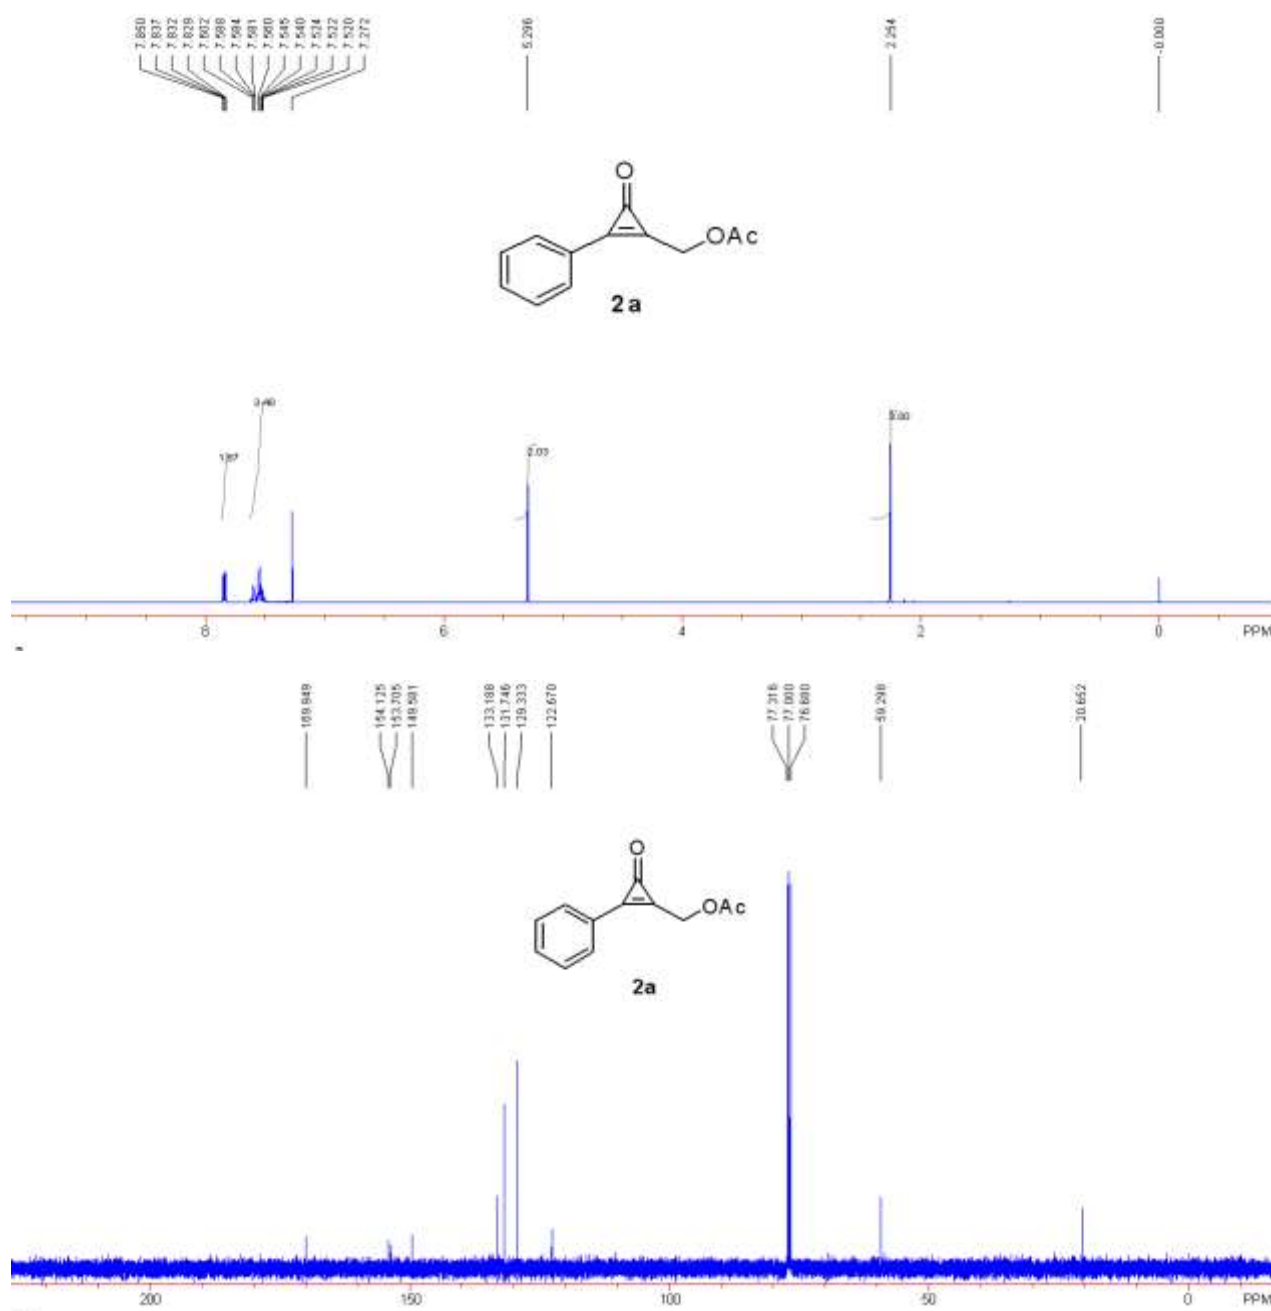

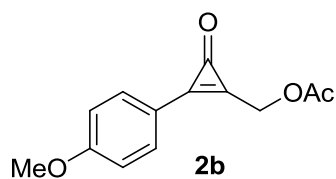

**(2-(4-methoxyphenyl)-3-oxocycloprop-1-enyl)methyl acetate 2b:** Following the general procedure, the mixture was purified by column chromatography using silica gel to give the target product **2b** (47% yield). A yellow solid. m.p. for **2b** = 115-116 °C; IR (CH<sub>2</sub>Cl<sub>2</sub>):  $\nu$  3051, 2922, 2842, 1856, 1743, 1630, 1600, 1571, 1507, 1467, 1370, 1307, 1257, 1218, 1171, 1113, 1024, 910, 833 cm<sup>-1</sup>; <sup>1</sup>H NMR (400 MHz, CDCl<sub>3</sub>, TMS):  $\delta$  7.80 (2H, dd,  $J_1$  = 7.6 Hz,  $J_2$  = 2.0 Hz), 7.02 (2H, dd,  $J_1$  = 7.6 Hz,  $J_2$  = 2.0 Hz), 5.25 (2H, s), 3.90 (3H, s), 2.25 (3H, s); <sup>13</sup>C NMR (CDCl<sub>3</sub>, 100 MHz):  $\delta$  169.9, 163.3, 153.7, 153.0, 145.2, 134.0, 115.5, 114.7, 59.2, 55.6, 20.7; MS (ESI) m/e 233.1 (M<sup>+</sup>+H); HRMS (ESI) for C<sub>13</sub>H<sub>12</sub>O<sub>4</sub> (M<sup>+</sup>): 232.0736, Found: 232.0747.

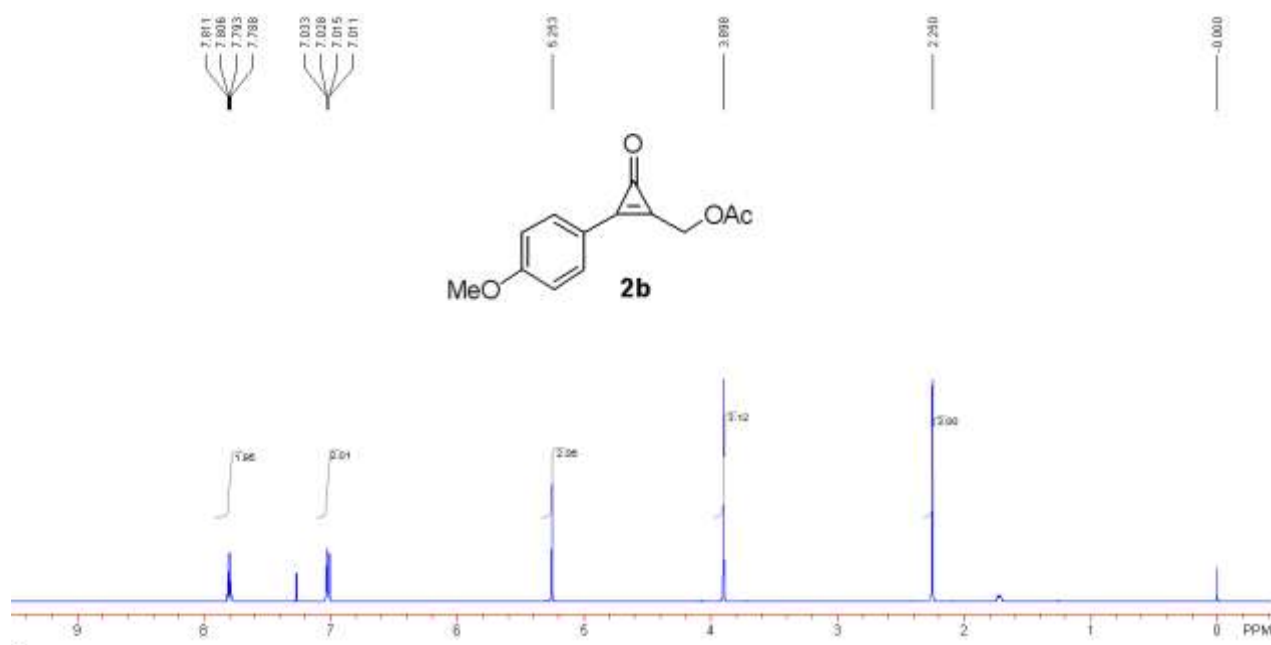

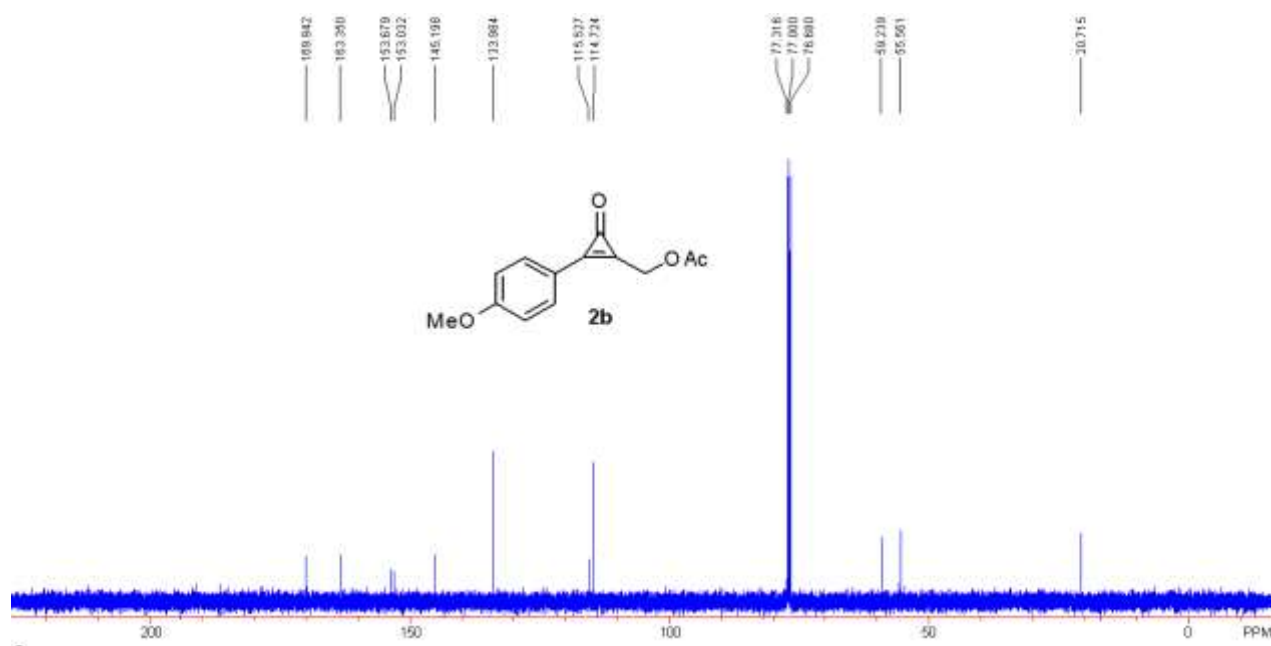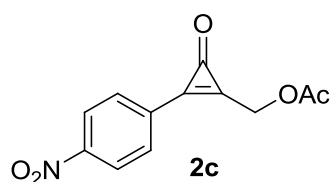

**(2-(4-nitrophenyl)-3-oxocycloprop-1-en-1-yl)methyl acetate 2c**: Following the general procedure, the mixture was purified by column chromatography using silica gel to give the target product **2c** (52% yield). A yellow solid. m.p. for **2c** = 139-140 °C; IR (CH<sub>2</sub>Cl<sub>2</sub>):  $\nu$  3104, 2924, 2853, 1861, 1746, 1647, 1600, 1519, 1432, 1380, 1343, 1316, 1281, 1219, 1090, 1043, 990, 867, 855 cm<sup>-1</sup>; <sup>1</sup>H NMR (400 MHz, CDCl<sub>3</sub>, TMS):  $\delta$  8.41 (2H, d,  $J$  = 8.8 Hz), 8.03 (2H, d,  $J$  = 8.8 Hz), 5.37 (2H, s), 2.28 (3H, s); <sup>13</sup>C NMR (CDCl<sub>3</sub>, 100 MHz):  $\delta$  169.7, 154.9, 152.9, 152.0, 149.7, 132.3, 127.6, 124.5, 59.5, 20.6; MS (ESI)  $m/e$  248.1 (M<sup>+</sup>+H); HRMS (ESI) for C<sub>12</sub>H<sub>9</sub>NO<sub>5</sub> (M<sup>+</sup>): 247.0481, Found: 247.0486.

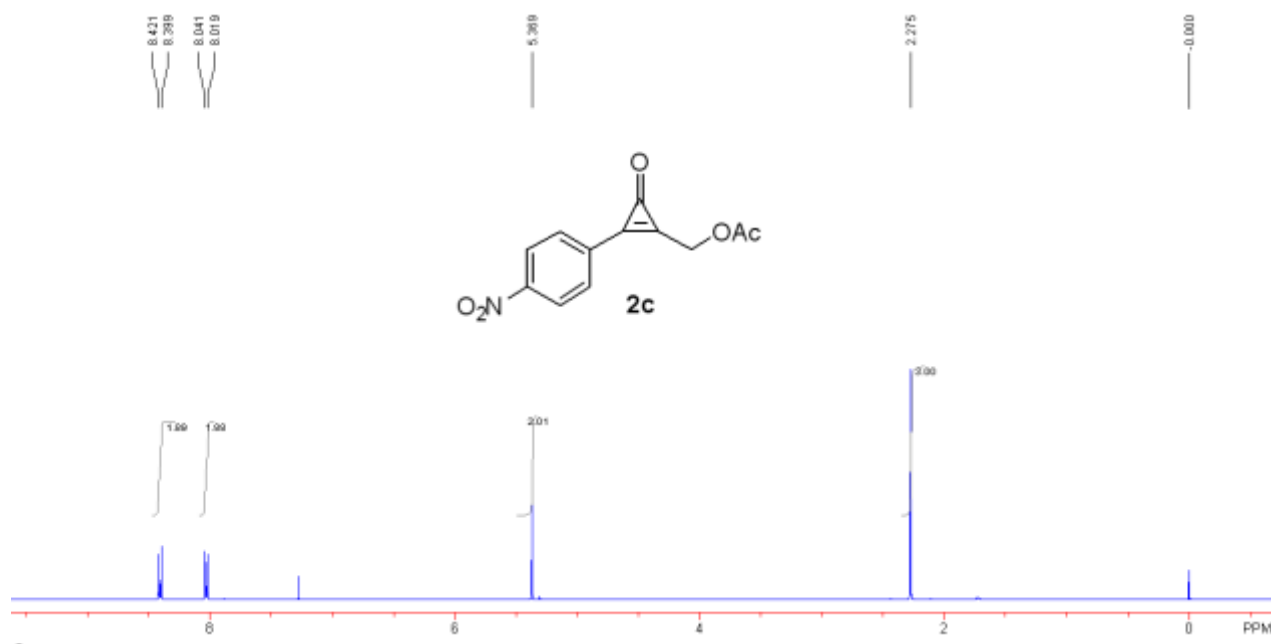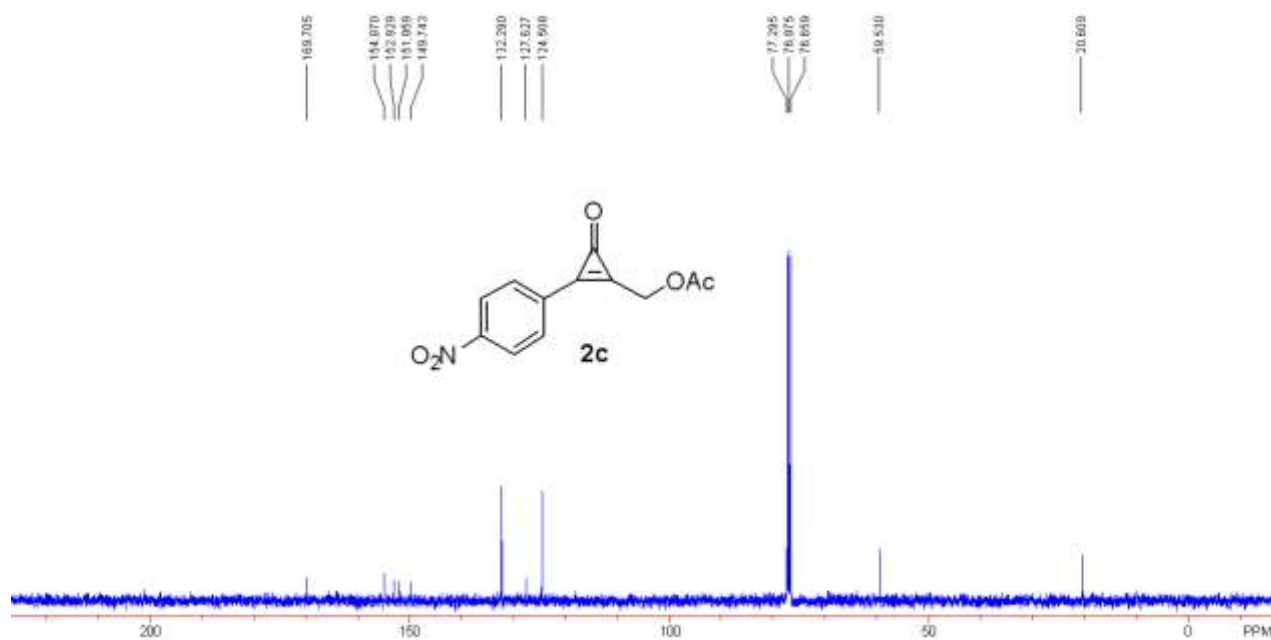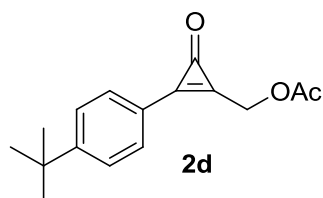

**(2-(4-*tert*-butylphenyl)-3-oxocycloprop-1-enyl)methyl acetate 2d:** Following the general procedure, the mixture was purified by column chromatography using silica gel to give the target product **2d** (10% yield). A yellow solid. m.p. for **2d** = 116-117 °C; IR (CH<sub>2</sub>Cl<sub>2</sub>): ν 2961, 2926, 1854, 1748, 1638, 1504, 1412, 1364, 1259, 1218, 1088, 1037, 1016, 841, 795 cm<sup>-1</sup>; <sup>1</sup>H NMR (400 MHz, CDCl<sub>3</sub>, TMS): δ 7.78 (2H, d, *J* = 8.8 Hz), 7.56 (2H, d, *J* = 8.8 Hz), 5.28 (2H, s), 2.26 (3H, s), 1.36



(9H, s);  $^{13}\text{C}$  NMR ( $\text{CDCl}_3$ , 100 MHz):  $\delta$  169.9, 157.0, 153.8, 153.4, 148.0, 131.6, 126.2, 119.9, 59.2, 35.2, 30.9, 20.6; MS (ESI)  $m/e$  259.1 ( $\text{M}^+ + \text{H}$ ); HRMS (ESI) for  $\text{C}_{16}\text{H}_{18}\text{O}_3$  ( $\text{M}^+$ ): 258.1256, Found: 258.1257.

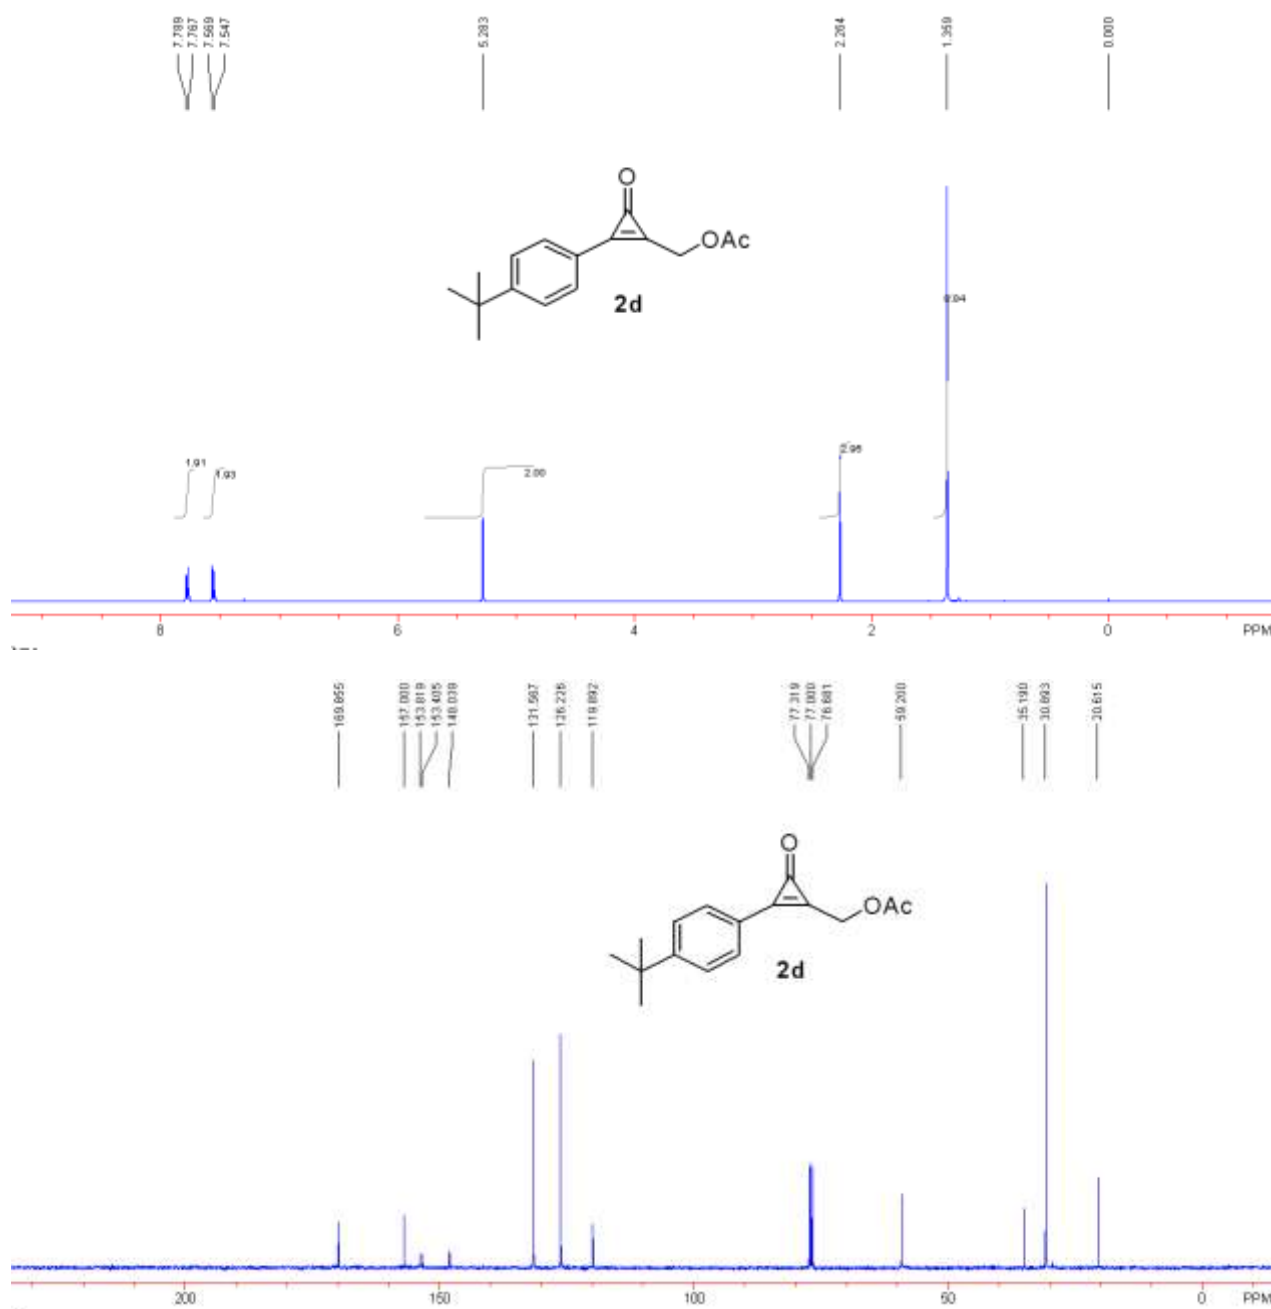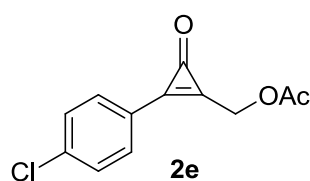

**(2-(4-chlorophenyl)-3-oxocycloprop-1-enyl)methyl acetate 2e:** Following the general procedure, the mixture was purified by column chromatography using silica gel to give the target product **2e**

(55% yield). A yellow solid. m.p. for **2e** = 126-127 °C; IR (CH<sub>2</sub>Cl<sub>2</sub>):  $\nu$  3087, 2929, 1934, 1859, 1807, 1741, 1634, 1587, 1566, 1482, 1440, 1402, 1368, 1276, 1224, 1173, 1095, 1044, 1011, 990, 845 cm<sup>-1</sup>; <sup>1</sup>H NMR (400 MHz, CDCl<sub>3</sub>, TMS):  $\delta$  7.78 (2H, d, *J* = 8.4 Hz), 7.53 (2H, d, *J* = 8.4 Hz), 5.29 (2H, s), 2.25 (3H, s); <sup>13</sup>C NMR (CDCl<sub>3</sub>, 100 MHz):  $\delta$  169.8, 153.3, 152.7, 150.0, 139.6, 132.8, 129.7, 121.1, 59.3, 20.6; MS (ESI) *m/e* 237.0 (M<sup>+</sup>+H); HRMS (ESI) for C<sub>12</sub>H<sub>9</sub>ClO<sub>3</sub> (M<sup>+</sup>): 236.0240, Found: 236.0249.

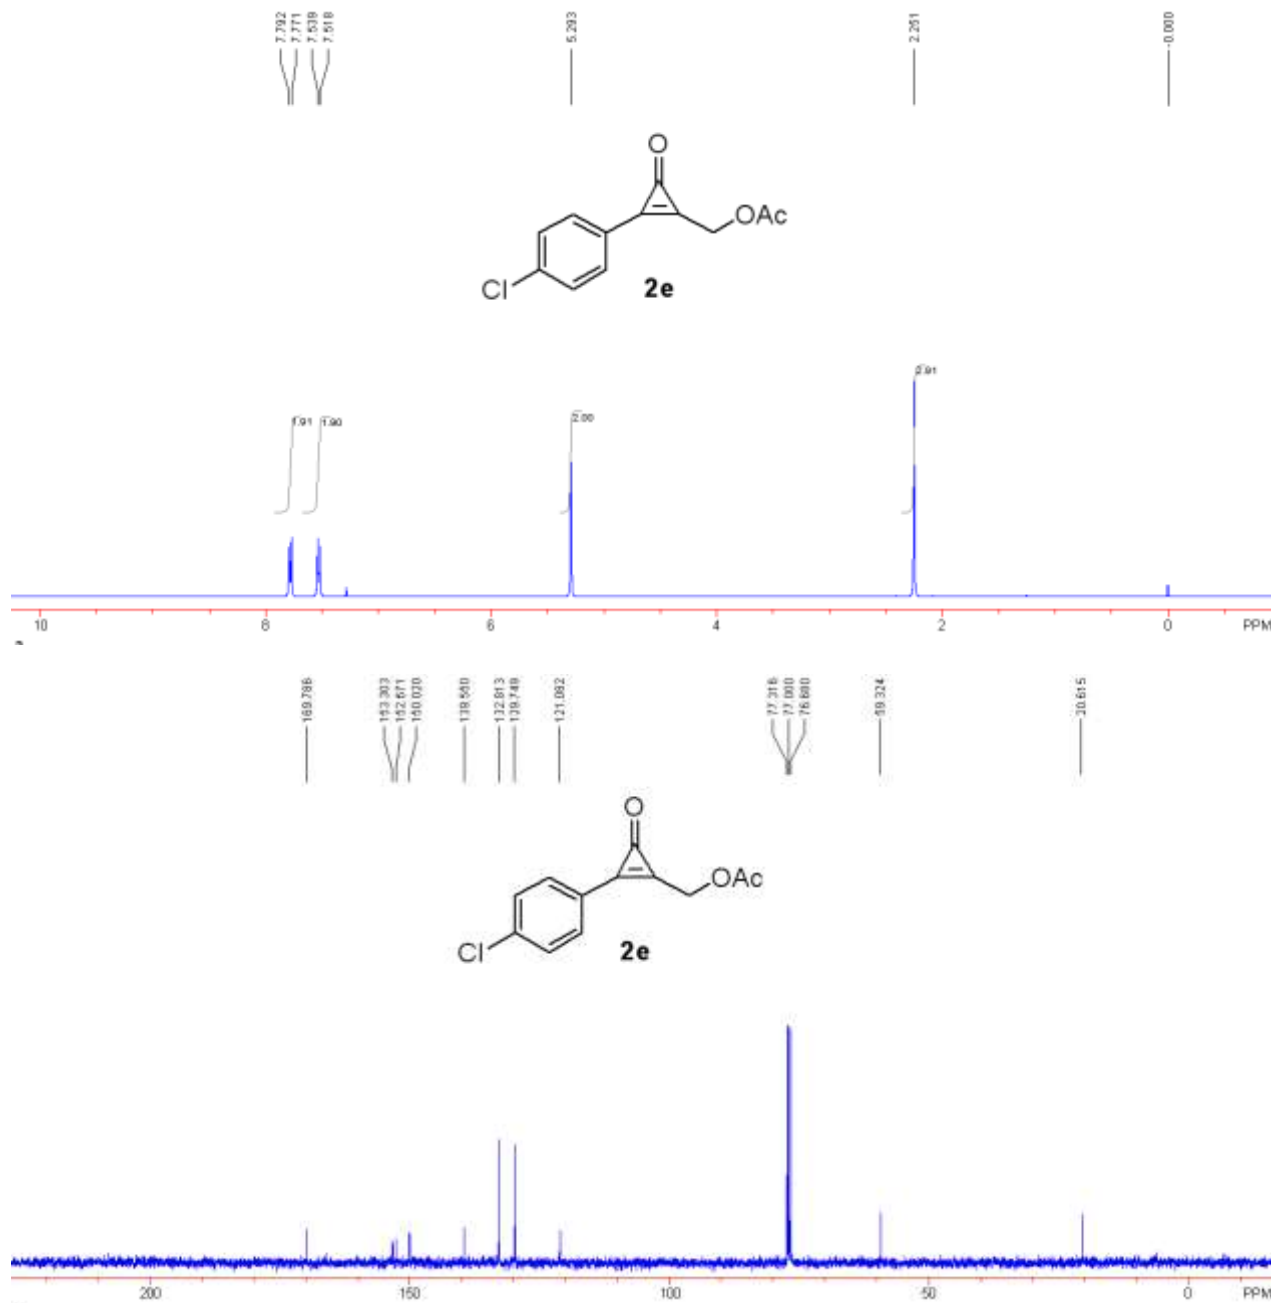

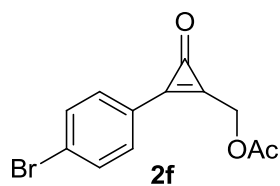

**(2-(4-bromophenyl)-3-oxocycloprop-1-enyl)methyl acetate 2f:** Following the general procedure, the mixture was purified by column chromatography using silica gel to give the target product **2f** (57% yield). A yellow solid. m.p. for **2f** = 153-155 °C; IR (CH<sub>2</sub>Cl<sub>2</sub>):  $\nu$  2962, 1860, 1746, 1634, 1582, 1400, 1259, 1236, 1090, 1064, 1017, 797 cm<sup>-1</sup>; <sup>1</sup>H NMR (400 MHz, CDCl<sub>3</sub>, TMS):  $\delta$  7.70-7.69 (4H, m), 5.28 (2H, s), 2.24 (3H, s); <sup>13</sup>C NMR (CDCl<sub>3</sub>, 100 MHz):  $\delta$  169.8, 153.3, 152.7, 150.3, 132.9, 132.7, 128.2, 121.4, 59.3, 20.6; MS (ESI)  $m/e$  281.0 (M<sup>+</sup>+H); HRMS (ESI) for C<sub>12</sub>H<sub>9</sub>BrO<sub>3</sub> (M<sup>+</sup>): 279.9735, Found: 279.9747.

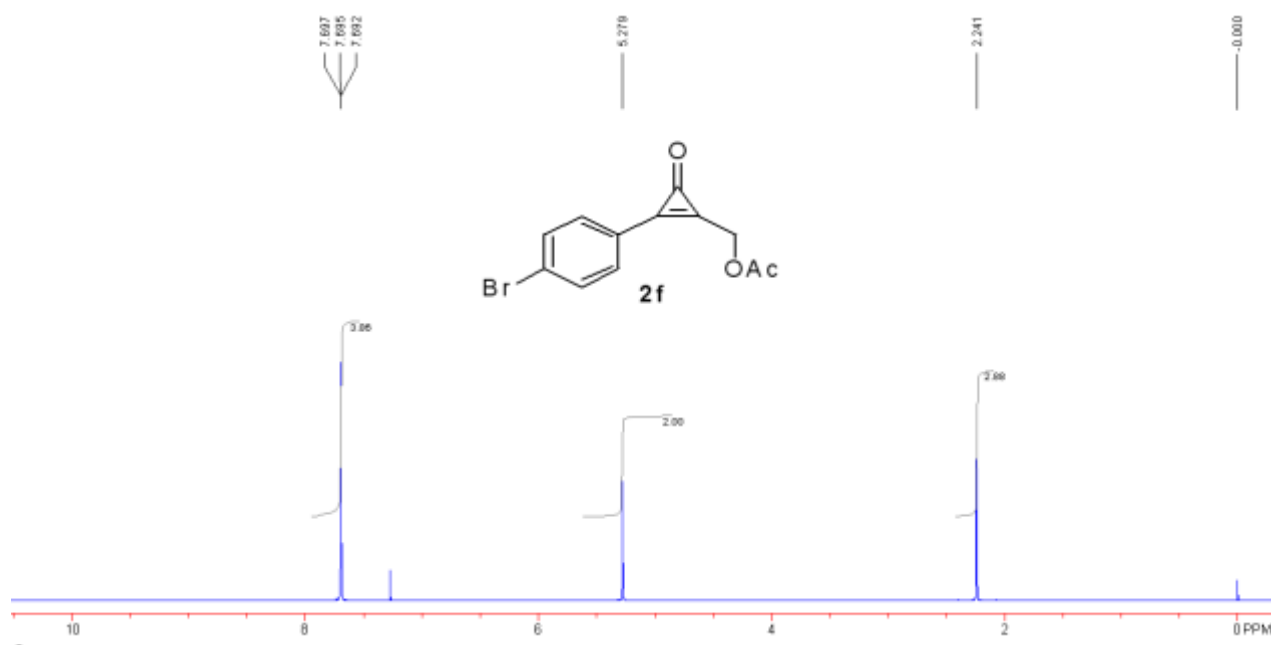

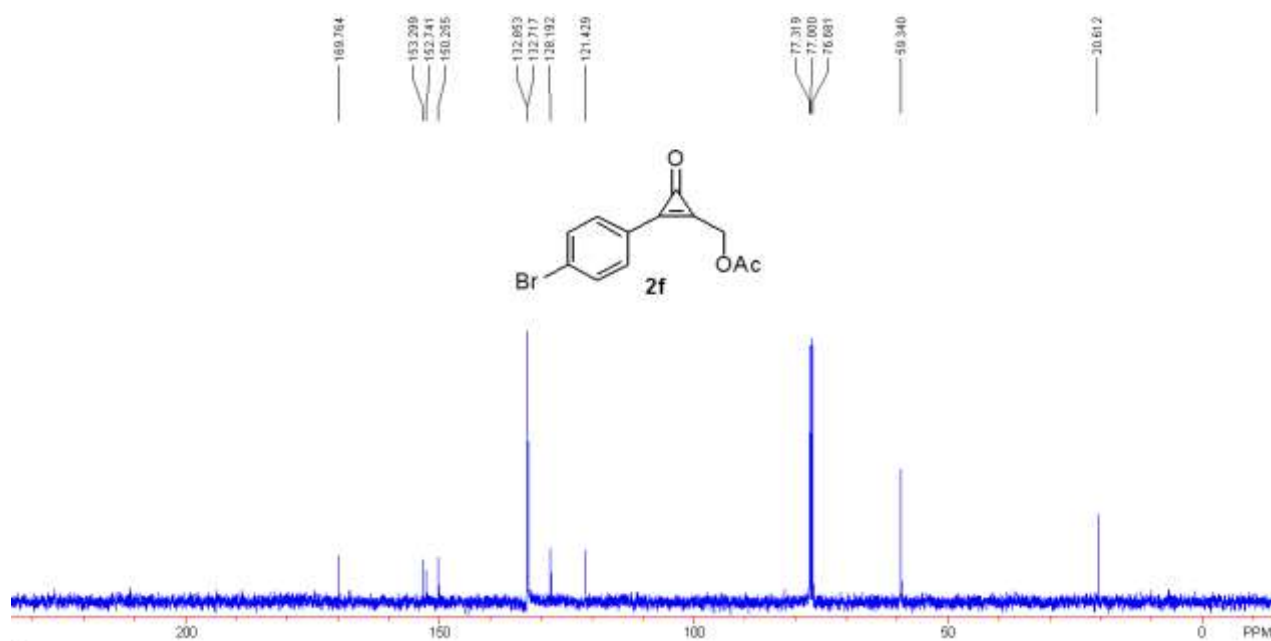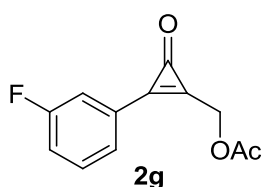

**(2-(3-fluorophenyl)-3-oxocycloprop-1-en-1-yl)methyl acetate 2g**: Following the general procedure, the mixture was purified by column chromatography using silica gel to give the target product **2g** (55% yield). A yellow solid. m.p. for **2g** = 90-92 °C; IR (CH<sub>2</sub>Cl<sub>2</sub>): ν 3054, 1854, 1749, 1646, 1607, 1584, 1483, 1442, 1377, 1265, 1217, 1040, 878, 793 cm<sup>-1</sup>; <sup>1</sup>H NMR (400 MHz, CDCl<sub>3</sub>, TMS): δ 7.64 (1H, d, *J* = 7.6 Hz), 7.56-7.51 (2H, m), 7.33-7.28 (1H, m), 5.31 (2H, s), 2.26 (3H, s); <sup>13</sup>C NMR (CDCl<sub>3</sub>, 100 MHz): δ 169.4, 163.3, 160.9, 152.6, 152.0, 151.4, 130.7 (d, *J*<sub>C-F</sub> = 8.1 Hz), 127.1, 123.8 (d, *J*<sub>C-F</sub> = 8.1 Hz), 119.6 (d, *J*<sub>C-F</sub> = 21.2 Hz), 117.5 (d, *J*<sub>C-F</sub> = 22.3 Hz), 59.0, 20.1; <sup>19</sup>F NMR (376 MHz, CDCl<sub>3</sub>, CFCl<sub>3</sub>): δ -110.9; MS (ESI) *m/e* 221.0 (M<sup>+</sup>+H); HRMS (ESI) for C<sub>12</sub>H<sub>9</sub>FO<sub>3</sub> (M<sup>+</sup>): 220.0536, Found: 220.0544.

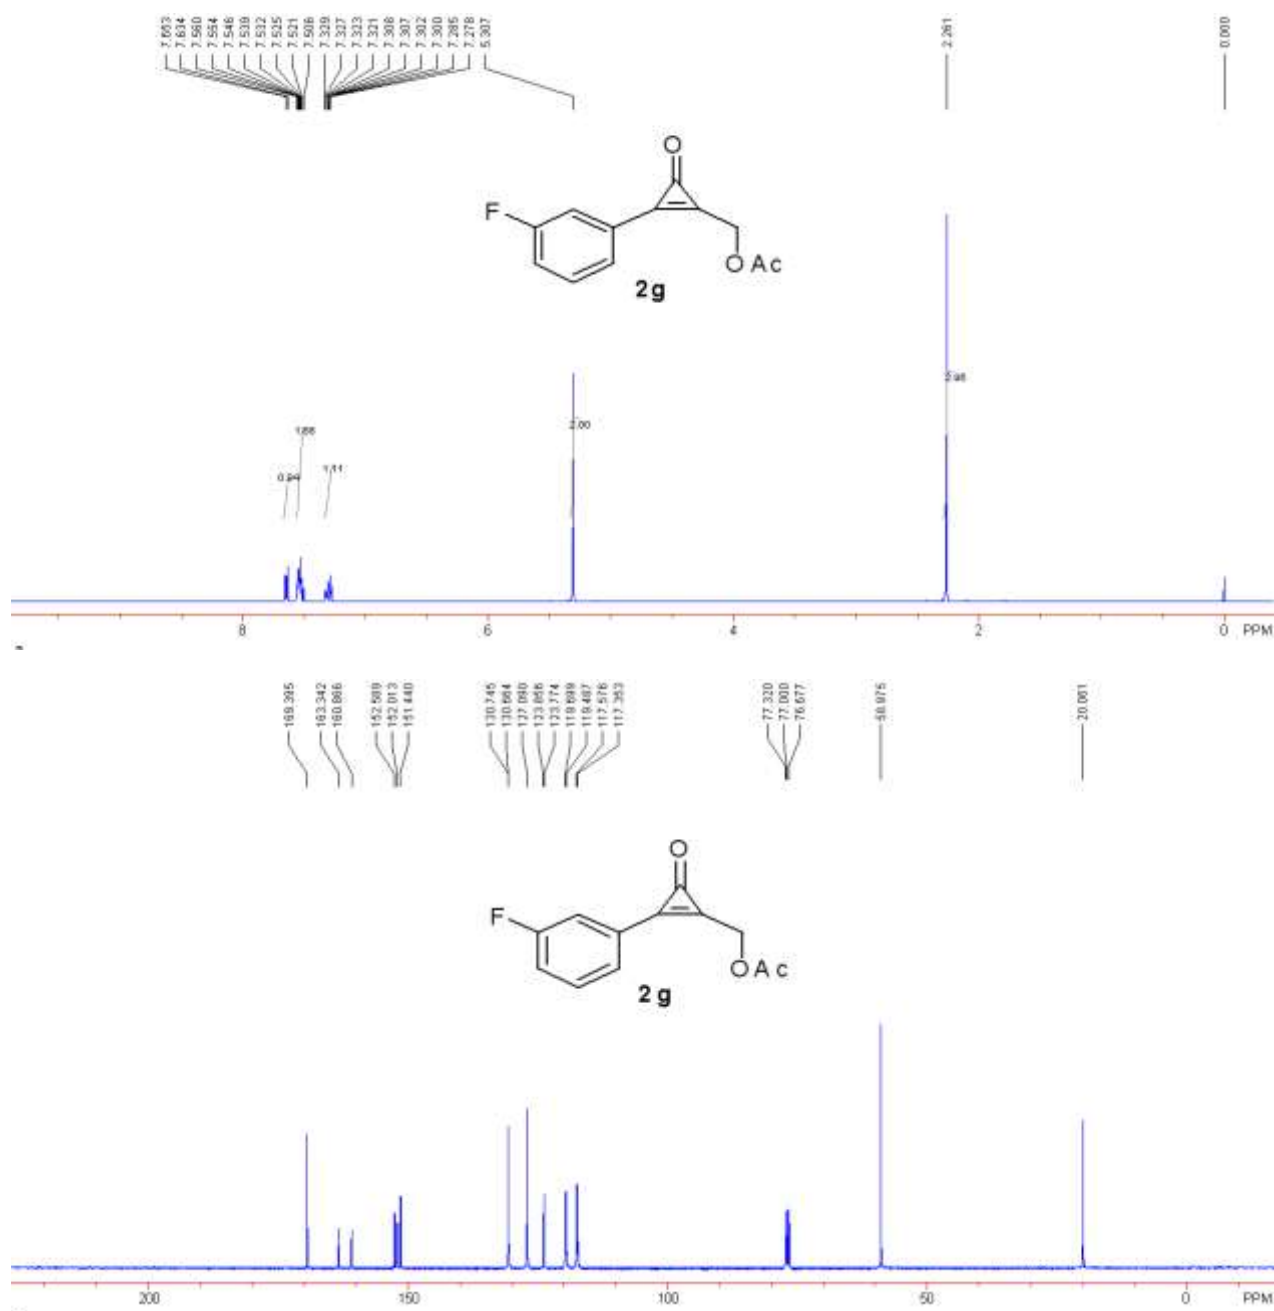

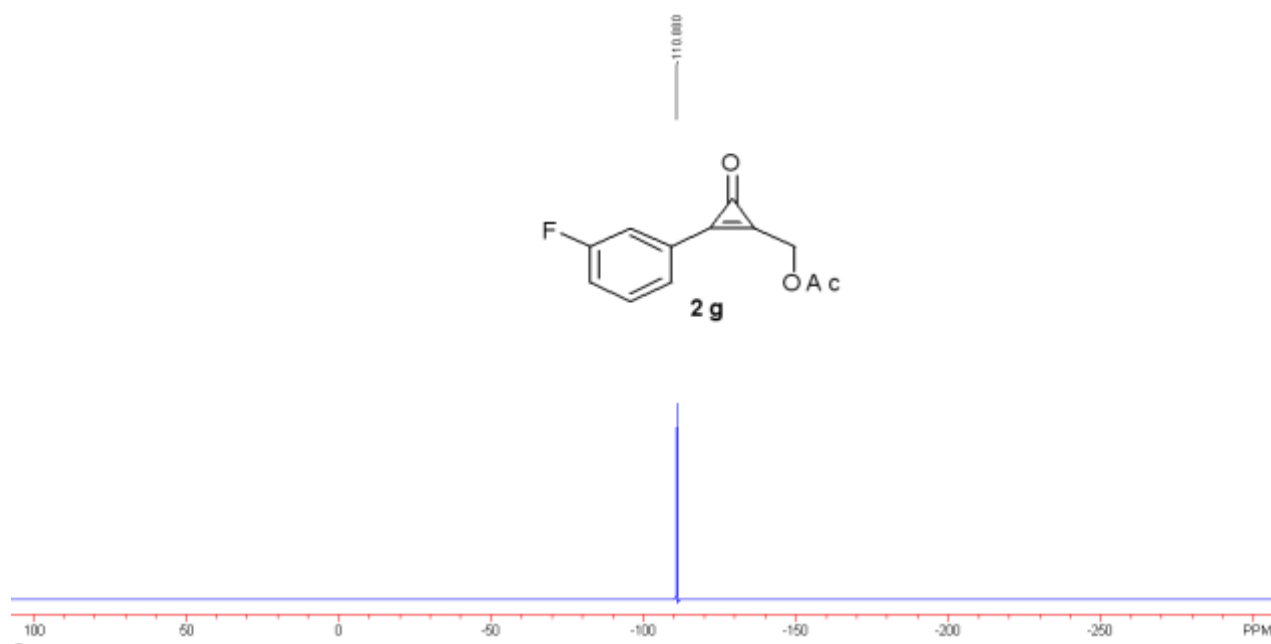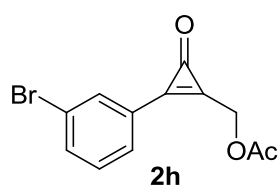

**(2-(3-bromophenyl)-3-oxocycloprop-1-en-1-yl)methyl acetate 2h:** Following the general procedure, the mixture was purified by column chromatography using silica gel to give the target product **2h** (52% yield). A yellow solid. m.p. for **2h** = 107-109 °C; IR (CH<sub>2</sub>Cl<sub>2</sub>):  $\nu$  3094, 3052, 2926, 1934, 1859, 1745, 1638, 1589, 1558, 1472, 1422, 1379, 1264, 1221, 1071, 1044, 937, 894 cm<sup>-1</sup>; <sup>1</sup>H NMR (400 MHz, CDCl<sub>3</sub>, TMS):  $\delta$  8.02 (1H, s), 7.79 (1H, d,  $J$  = 6.4 Hz), 7.72 (1H, d,  $J$  = 8.0 Hz), 7.43 (1H, t,  $J$  = 8.0 Hz), 5.32 (2H, s), 2.29 (3H, s); <sup>13</sup>C NMR (CDCl<sub>3</sub>, 100 MHz):  $\delta$  169.8, 153.1, 152.6, 151.7, 135.8, 134.2, 130.8, 130.3, 124.3, 123.1, 59.5, 20.7; MS (ESI)  $m/e$  281.0 (M<sup>+</sup>+H); HRMS (ESI) for C<sub>12</sub>H<sub>9</sub>BrO<sub>3</sub> (M<sup>+</sup>): 279.9735, Found: 279.9742.

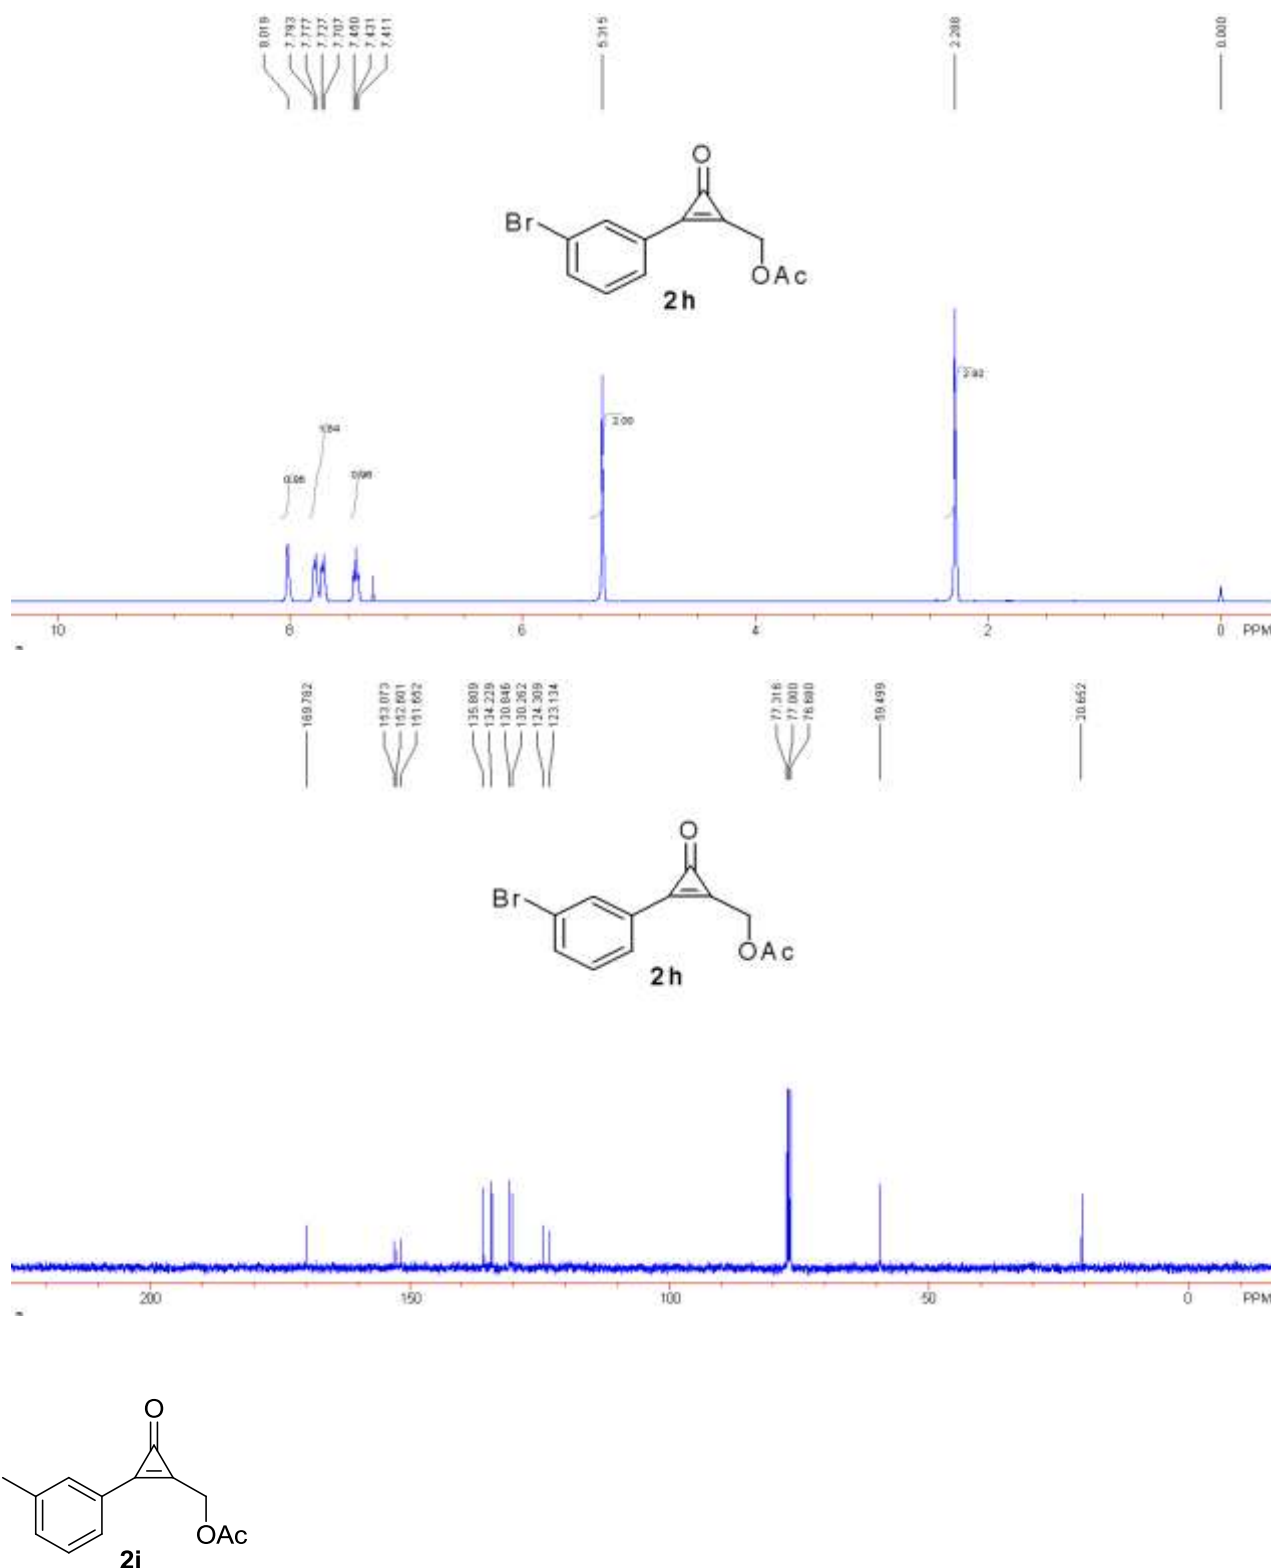

**(3-oxo-2-m-tolylcycloprop-1-enyl)methyl acetate 2i:** Following the general procedure, the mixture was purified by column chromatography using silica gel to give the target product **2i** (54% yield). A yellow solid. m.p. for **2i** = 67-69 °C; IR (CH<sub>2</sub>Cl<sub>2</sub>): ν 2925, 1851, 1745, 1637, 1483, 1423, 1375, 1215, 1090, 1039, 922, 888 cm<sup>-1</sup>; <sup>1</sup>H NMR (400 MHz, CDCl<sub>3</sub>, TMS): δ 7.66 (1H, s), 7.63 (1H, d, *J* = 6.4 Hz), 7.45-7.40 (2H, m), 5.29 (2H, s), 2.43 (3H, s), 2.26 (3H, s); <sup>13</sup>C NMR (CDCl<sub>3</sub>, 100 MHz): δ

169.9, 153.9, 153.86, 149.3, 139.2, 133.9, 132.4, 129.1, 128.7, 122.6, 59.3, 21.1, 20.6; MS (ESI)  $m/e$  217.1 ( $M^+ + H$ ); HRMS (ESI) for  $C_{13}H_{12}O_3$  ( $M^+$ ): 216.0786, Found: 216.0794.

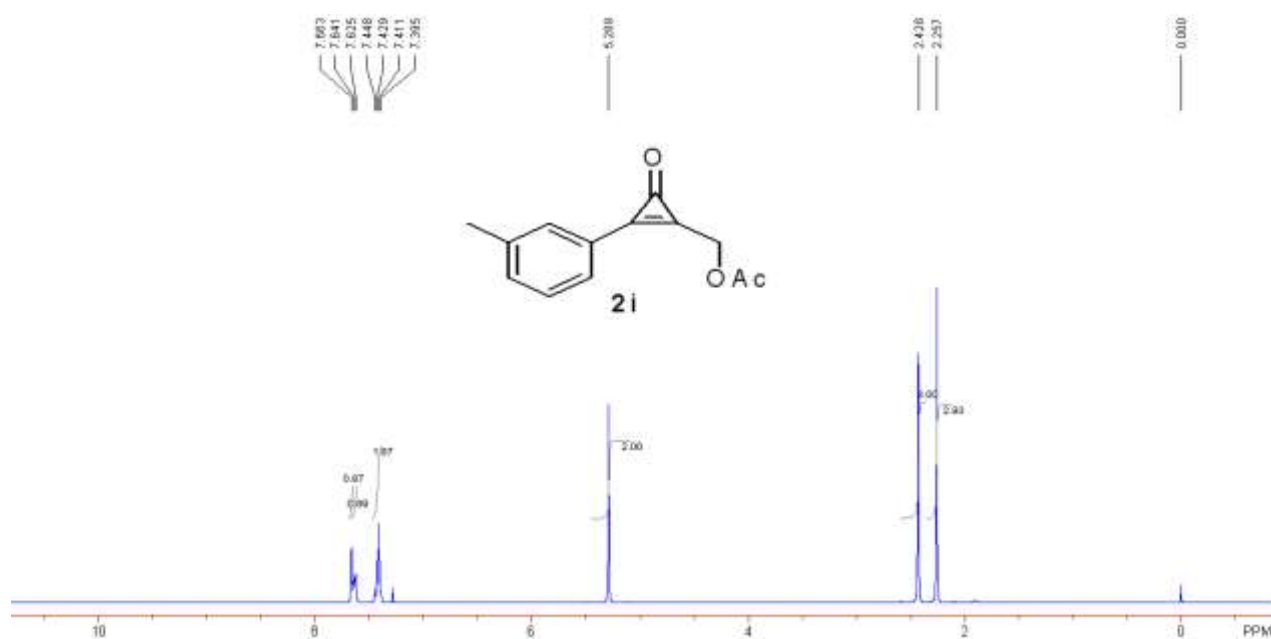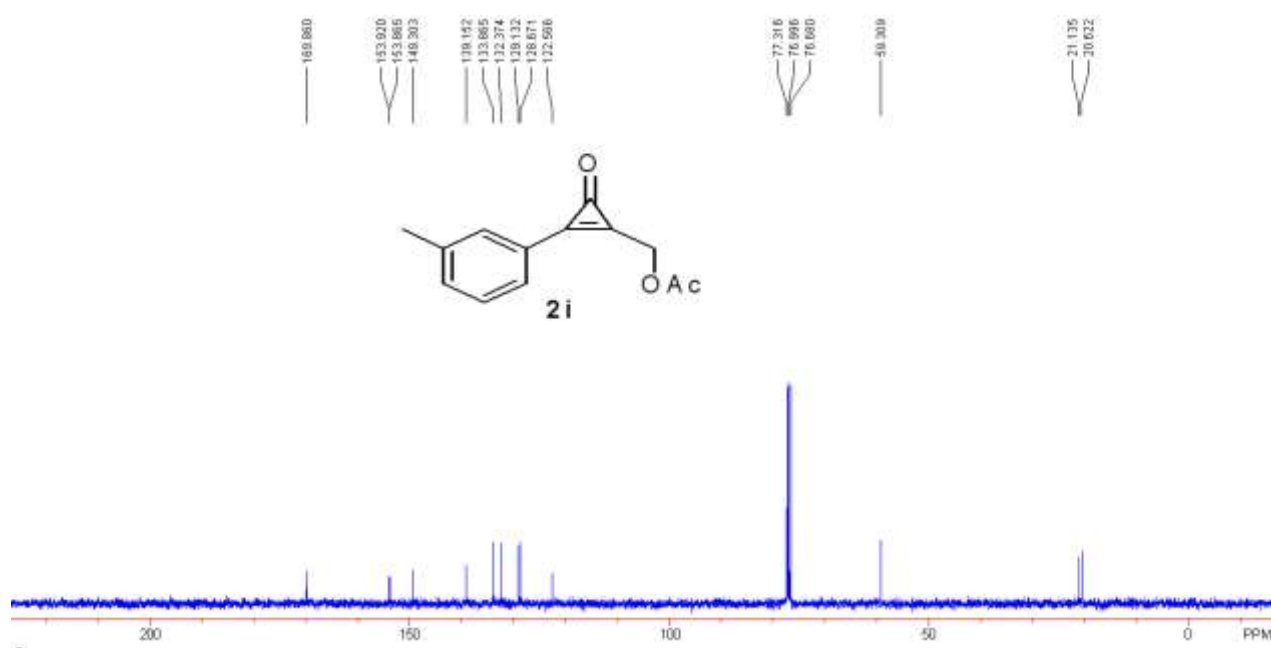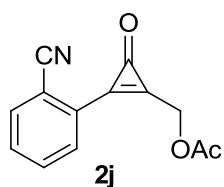

**(2-(2-cyanophenyl)-3-oxocycloprop-1-en-1-yl)methyl acetate 2j:** Following the general procedure, the mixture was purified by column chromatography using silica gel to give the target product **2j** (45% yield). A yellow solid. m.p. for **2j** = 152-154 °C; IR ( $CH_2Cl_2$ ):  $\nu$  2961, 2928, 2231, 1859, 1753,



1644, 1480, 1427, 1379, 1259, 1218, 1089, 1035, 928, 865  $\text{cm}^{-1}$ ;  $^1\text{H}$  NMR (400 MHz,  $\text{CDCl}_3$ , TMS):  $\delta$  8.00 (1H, d,  $J = 7.6$  Hz), 7.87 (1H, d,  $J = 8.0$  Hz), 7.82 (1H, dt,  $J_1 = 8.0$  Hz,  $J_2 = 1.2$  Hz), 7.72 (1H, dt,  $J_1 = 8.0$  Hz,  $J_2 = 1.2$  Hz), 5.43 (2H, s), 2.23 (3H, s);  $^{13}\text{C}$  NMR ( $\text{CDCl}_3$ , 100 MHz):  $\delta$  170.2, 155.1, 153.1, 149.8, 133.7, 133.5, 133.4, 133.0, 126.2, 117.1, 112.8, 60.2, 20.5; MS (ESI)  $m/e$  228.1 ( $\text{M}^+ + \text{H}$ ); HRMS (ESI) for  $\text{C}_{13}\text{H}_9\text{NO}_3$  ( $\text{M}^+$ ): 227.0582, Found: 227.0591.

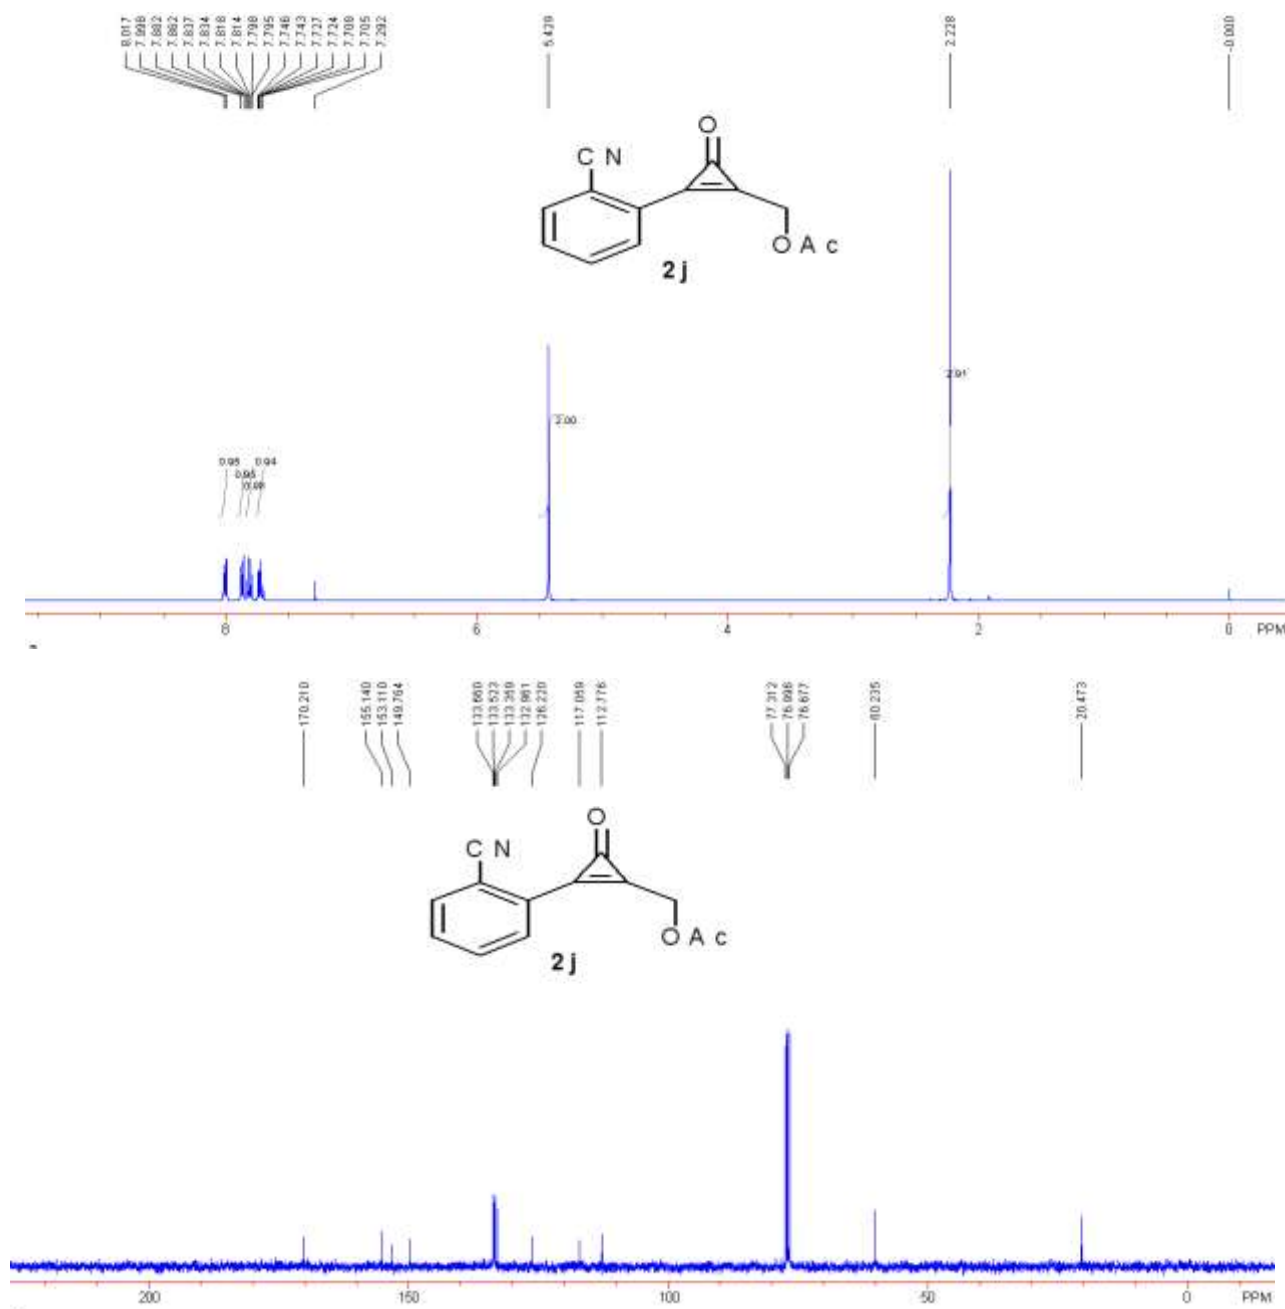

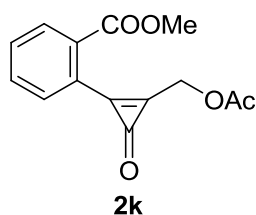

**methyl 2-(2-(acetoxymethyl)-3-oxocycloprop-1-enyl)benzoate 2k:** Following the general procedure, the mixture was purified by column chromatography using silica gel to give the target product **2k** (60% yield). A white solid. m.p. for **2k** = 66-67 °C; IR (CH<sub>2</sub>Cl<sub>2</sub>):  $\nu$  2953, 1857, 1744, 1719, 1641, 1594, 1573, 1432, 1374, 1271, 1217, 1130, 1082, 1043, 960, 865 cm<sup>-1</sup>; <sup>1</sup>H NMR (400 MHz, CDCl<sub>3</sub>, TMS):  $\delta$  8.09 (1H, dd,  $J_1$  = 7.6 Hz,  $J_2$  = 1.2 Hz), 7.84 (1H, dd,  $J_1$  = 7.6 Hz,  $J_2$  = 0.8 Hz), 7.69 (1H, dt,  $J_1$  = 7.6 Hz,  $J_2$  = 0.8 Hz), 7.63 (1H, dt,  $J_1$  = 7.6 Hz,  $J_2$  = 0.8 Hz), 5.32 (2H, s), 3.99 (3H, s), 2.17 (3H, s); <sup>13</sup>C NMR (CDCl<sub>3</sub>, 100 MHz):  $\delta$  170.2, 166.0, 154.5, 153.4, 153.1, 132.52, 132.50, 132.1, 131.0, 130.6, 123.4, 59.9, 53.1, 20.5; MS (ESI) m/e 261.1 (M<sup>+</sup>+H); HRMS (ESI) for C<sub>14</sub>H<sub>12</sub>O<sub>5</sub> (M<sup>+</sup>): 260.0685, Found: 260.0692.

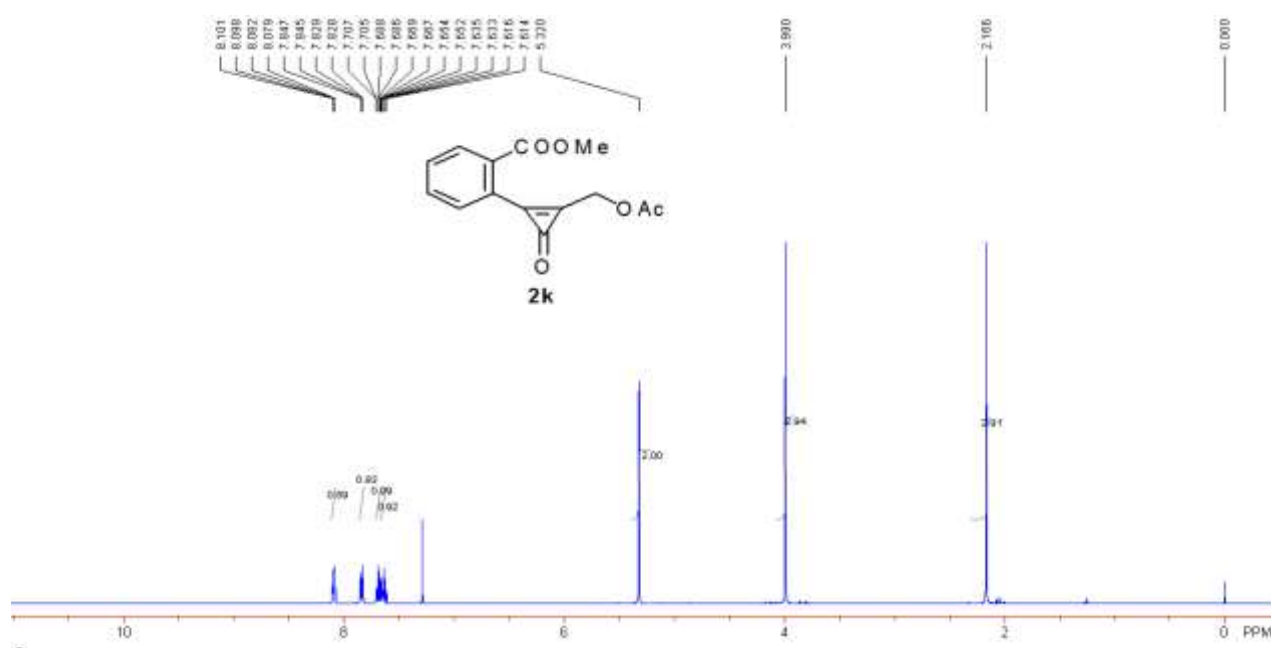

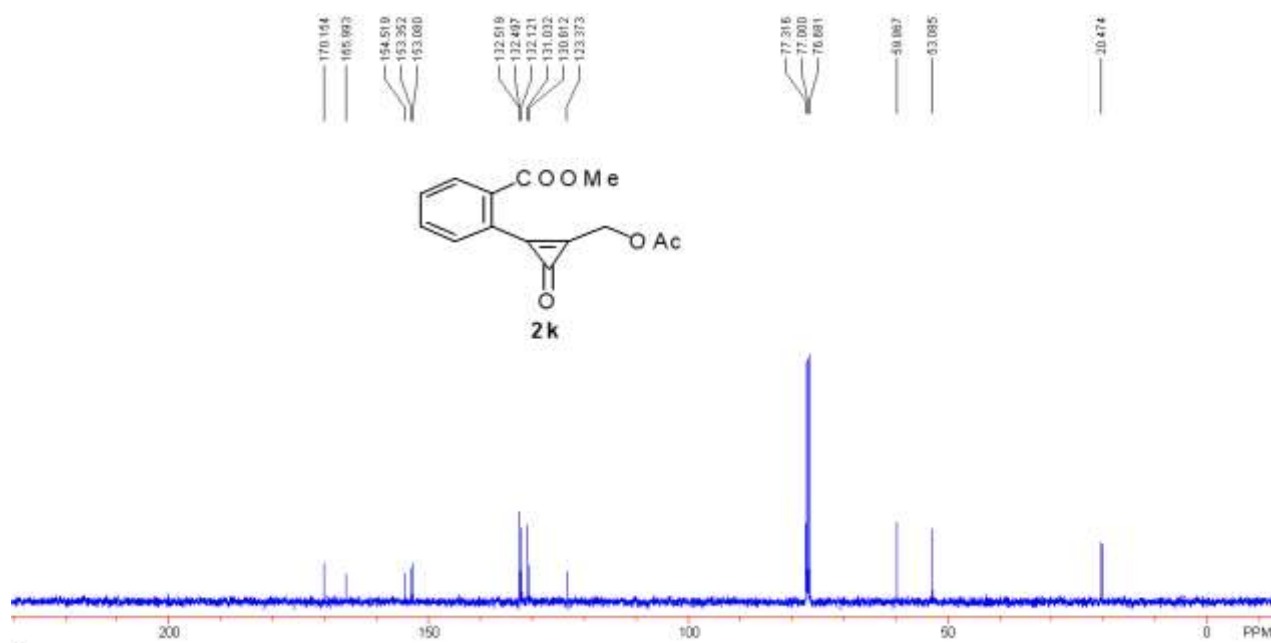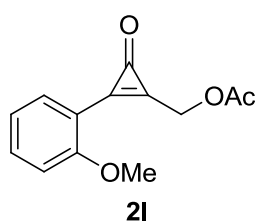

**(2-(2-methoxyphenyl)-3-oxocycloprop-1-enyl)methyl acetate 2l:** Following the general procedure, the mixture was purified by column chromatography using silica gel to give the target product **2l** (36% yield). A yellow solid. m.p. for **2l** = 98-100 °C; IR (CH<sub>2</sub>Cl<sub>2</sub>):  $\nu$  2938, 1848, 1744, 1636, 1596, 1577, 1488, 1465, 1436, 1372, 1279, 1219, 1163, 1043, 1020, 865 cm<sup>-1</sup>; <sup>1</sup>H NMR (400 MHz, CDCl<sub>3</sub>, TMS):  $\delta$  7.78 (1H, dd,  $J_1$  = 7.6 Hz,  $J_2$  = 1.6 Hz), 7.58-7.54 (1H, m), 7.07 (1H, dt,  $J_1$  = 7.6 Hz,  $J_2$  = 0.8 Hz), 7.01 (1H, d,  $J$  = 8.8 Hz), 5.25 (2H, s), 3.97 (3H, s), 2.20 (3H, s); <sup>13</sup>C NMR (CDCl<sub>3</sub>, 100 MHz):  $\delta$  170.3, 158.7, 153.8, 149.5, 148.3, 135.3, 134.1, 120.9, 112.0, 111.0, 59.9, 55.8, 20.5; MS (ESI)  $m/e$  233.1 (M<sup>+</sup>+H); HRMS (ESI) for C<sub>13</sub>H<sub>12</sub>O<sub>4</sub> (M<sup>+</sup>): 232.0736, Found: 232.0745.

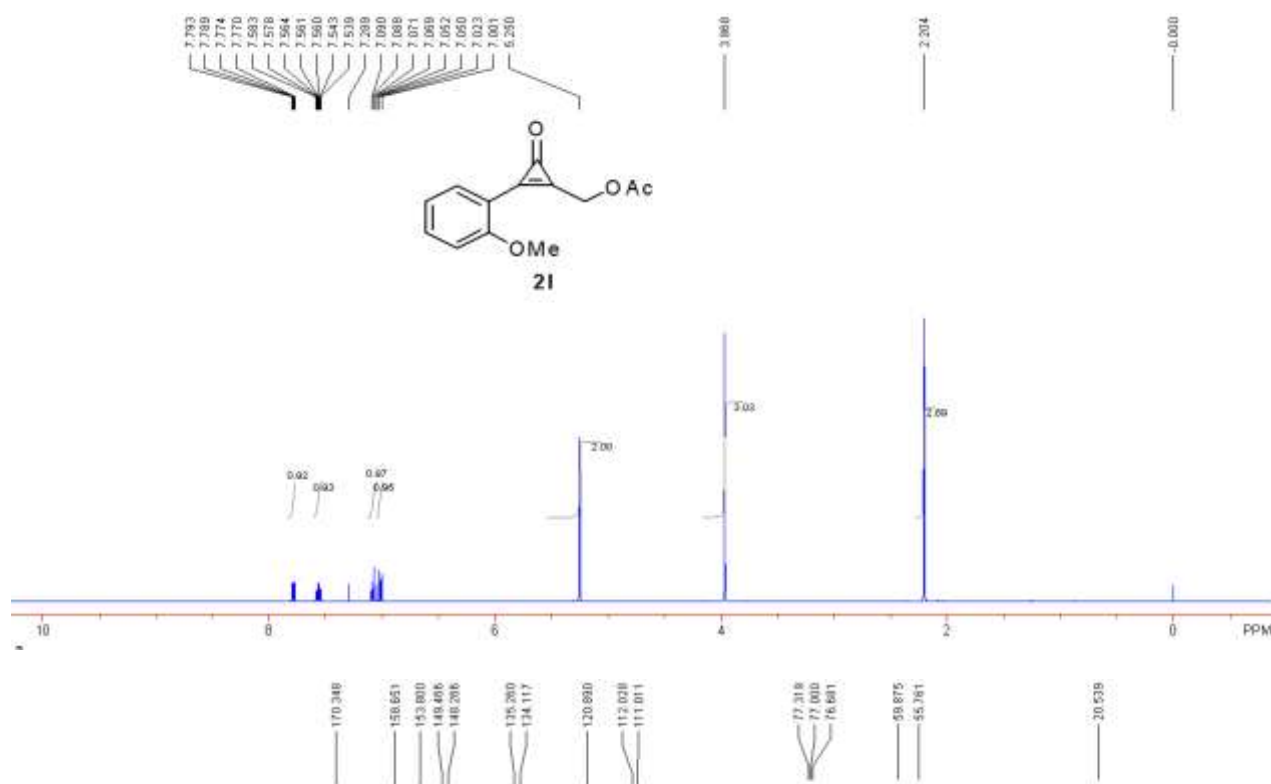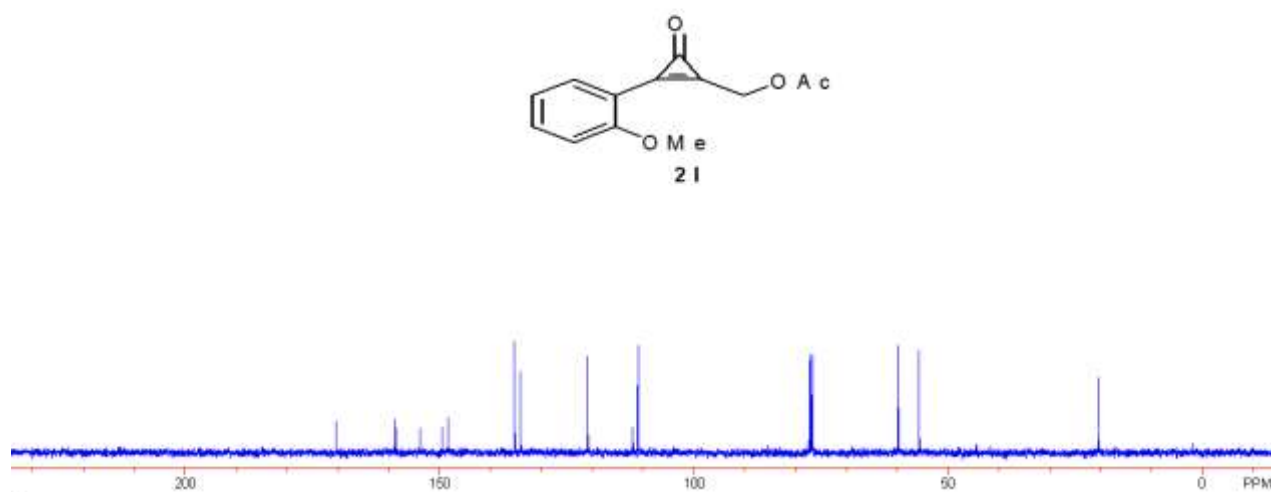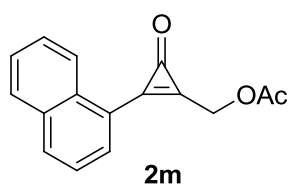

**(2-(naphthalen-1-yl)-3-oxocycloprop-1-enyl)methyl acetate **2m**:** Following the general procedure, the mixture was purified by column chromatography using silica gel to give the target product **2m** (55% yield). A yellow solid. m.p. for **2m** = 111-113 °C; IR (CH<sub>2</sub>Cl<sub>2</sub>):  $\nu$  2962, 1845, 1749, 1630, 1374, 1259, 1221, 1087, 1015, 864, 796 cm<sup>-1</sup>; <sup>1</sup>H NMR (400 MHz, CDCl<sub>3</sub>, TMS):  $\delta$  8.63 (1H, d, *J* = 8.8 Hz), 8.09 (1H, d, *J* = 8.4 Hz), 8.03 (1H, d, *J* = 6.4 Hz), 7.92 (1H, d, *J* = 8.4 Hz), 7.76-7.72 (1H,

m), 7.63-7.58 (2H, m), 5.39 (2H, s), 2.28 (3H, s);  $^{13}\text{C}$  NMR ( $\text{CDCl}_3$ , 100 MHz):  $\delta$  169.9, 154.0, 152.7, 148.1, 134.2, 133.5, 132.9, 130.9, 128.6, 128.3, 127.2, 125.8, 125.2, 120.7, 59.3, 20.7; MS (ESI)  $m/e$  253.1 ( $\text{M}^+ + \text{H}$ ); HRMS (ESI) for  $\text{C}_{16}\text{H}_{12}\text{O}_3$  ( $\text{M}^+$ ): 252.0786, Found: 252.0792.

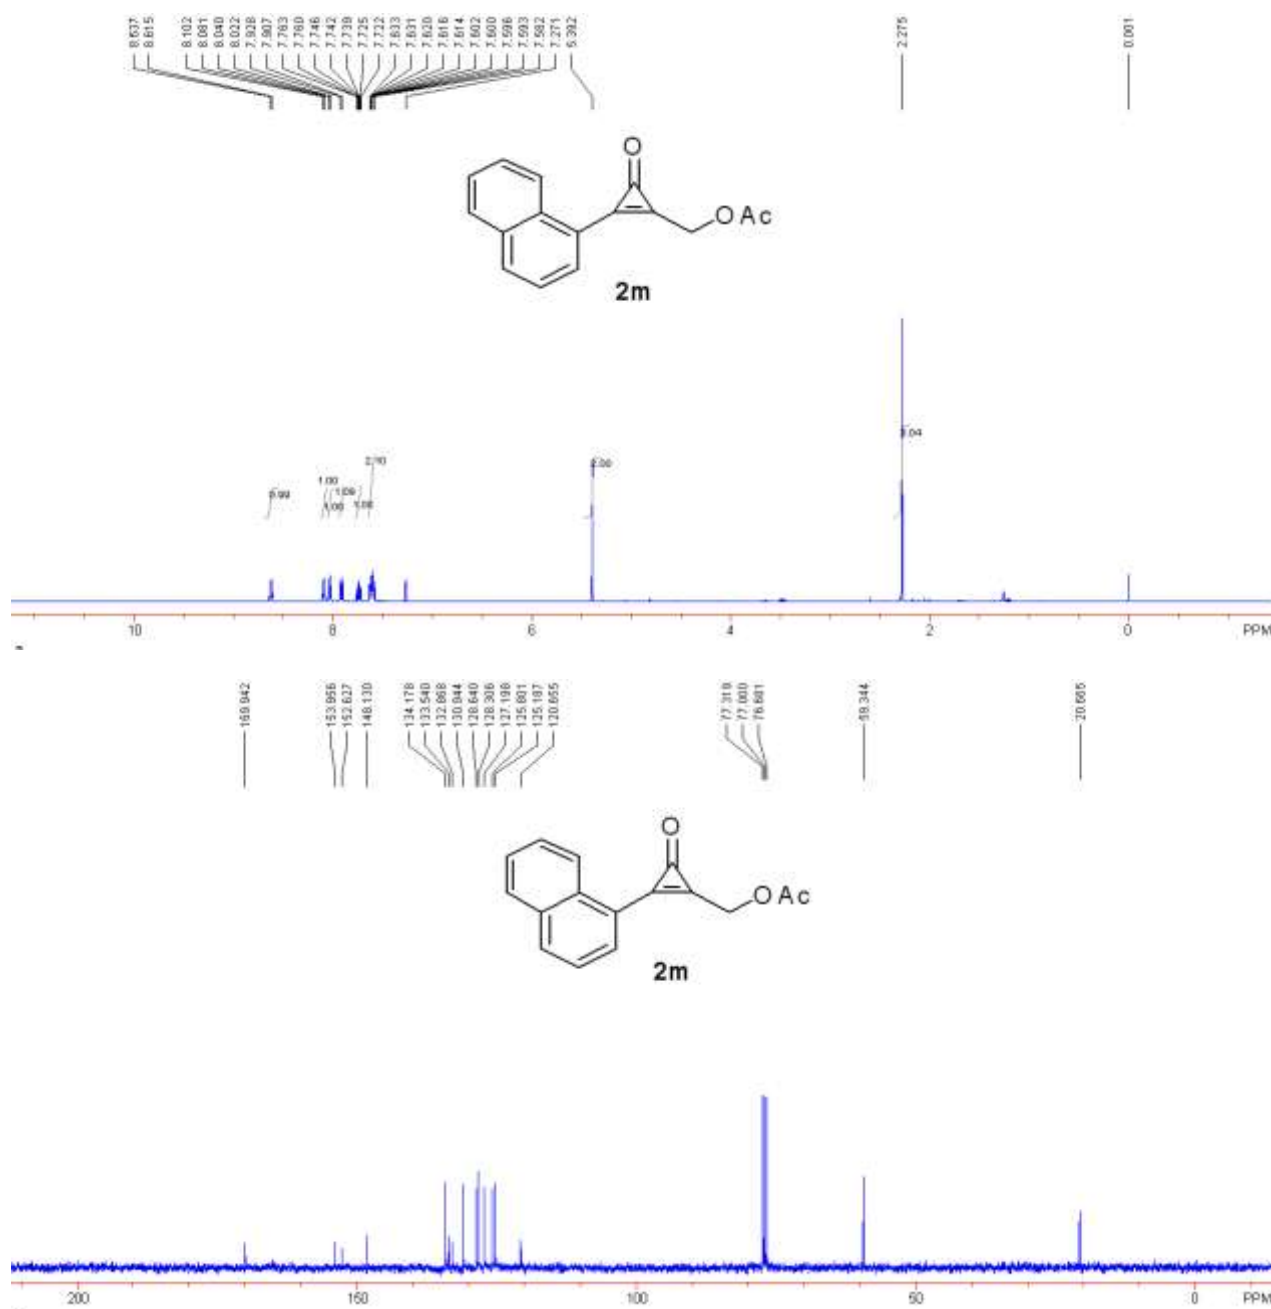

Typical procedure for preparation of **2n**:

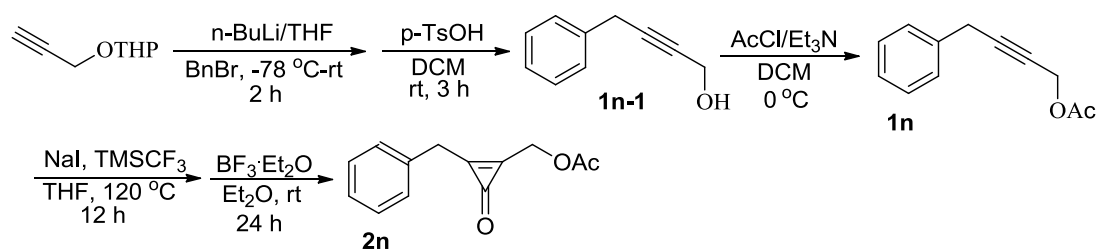

To a solution of 2-(prop-2-yn-1-yloxy)tetrahydro-2H-pyran (10.0 mmol) in 10.0 mL THF at -78 °C was added n-BuLi (2.50 M, 4.40 mL) under Ar atmosphere, the resulting mixture was stirred for 1 hour at this temperature and BnBr (11.0 mmol) was added, then the reaction was allowed to warm to room temperature for 2 hours. After the reaction completed, the reaction was quenched by addition of saturated  $\text{NH}_4\text{Cl}$  solution, extracted with  $\text{Et}_2\text{O}$ , dried over anhydrous  $\text{Na}_2\text{SO}_4$ . The solvent was concentrated under reduced pressure and the residue was further purified by silica gel column chromatography ( $\text{EtOAc/PE} = 1/20$ ) to give the target product **1n-1**.

Above **1n-1** (470 mg, 3.2 mmol) was dissolved in 10 mL of  $\text{CH}_2\text{Cl}_2$  mixed with 0.51 mL (3.86 mmol)  $\text{Et}_3\text{N}$  and 0.28 mL (3.86 mmol) of  $\text{AcCl}$  was added at 0 °C, the resulting mixture was stirred at this temperature for 1 hour. The reaction was quenched by addition of saturated  $\text{NaHCO}_3$  solution, extracted with  $\text{CH}_2\text{Cl}_2$ , dried over anhydrous  $\text{Na}_2\text{SO}_4$ . The solvent was removed under reduced pressure and the residue was purified by column chromatography on silica gel ( $\text{EtOAc/PE} = 1/8$  as eluent) to furnish product **1n** as colorless oil (300 mg, 50% yield).

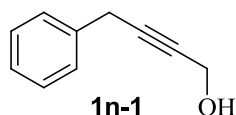

**4-phenylbut-2-yn-1-ol 1n-1:** Following the general procedure, the mixture was purified by column chromatography using silica gel to give the target product **1n-1** (29% yield). A colorless oil. IR ( $\text{CH}_2\text{Cl}_2$ ):  $\nu$  3338, 3061, 3029, 2924, 1719, 1600, 1494, 1452, 1397, 1263, 1176, 1129, 1073, 1018, 730  $\text{cm}^{-1}$ ;  $^1\text{H}$  NMR (400 MHz,  $\text{CDCl}_3$ , TMS):  $\delta$  7.37-7.23 (5H, m), 4.31 (2H, t,  $J = 2.0$  Hz), 3.64 (2H, t,  $J = 2.0$  Hz), 2.05 (1H, s);  $^{13}\text{C}$  NMR ( $\text{CDCl}_3$ , 100 MHz):  $\delta$  136.4, 128.5, 127.83, 127.82, 126.6, 83.8, 80.4, 51.2, 25.0; MS (%)  $m/e$  146 (53), 131 (14), 128 (82), 115 (100), 102 (11), 91 (35), 77 (16), 63 (14); HRMS (EI) for  $\text{C}_{10}\text{H}_{10}\text{O}$ : 146.0732; Found: 146.0729.

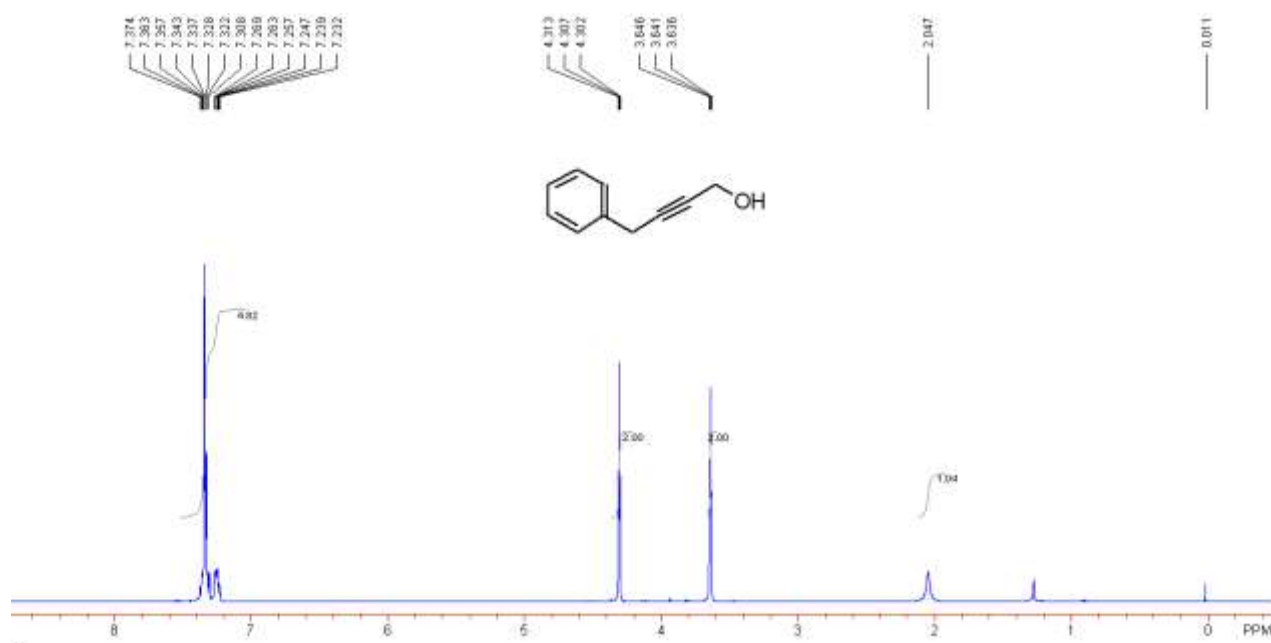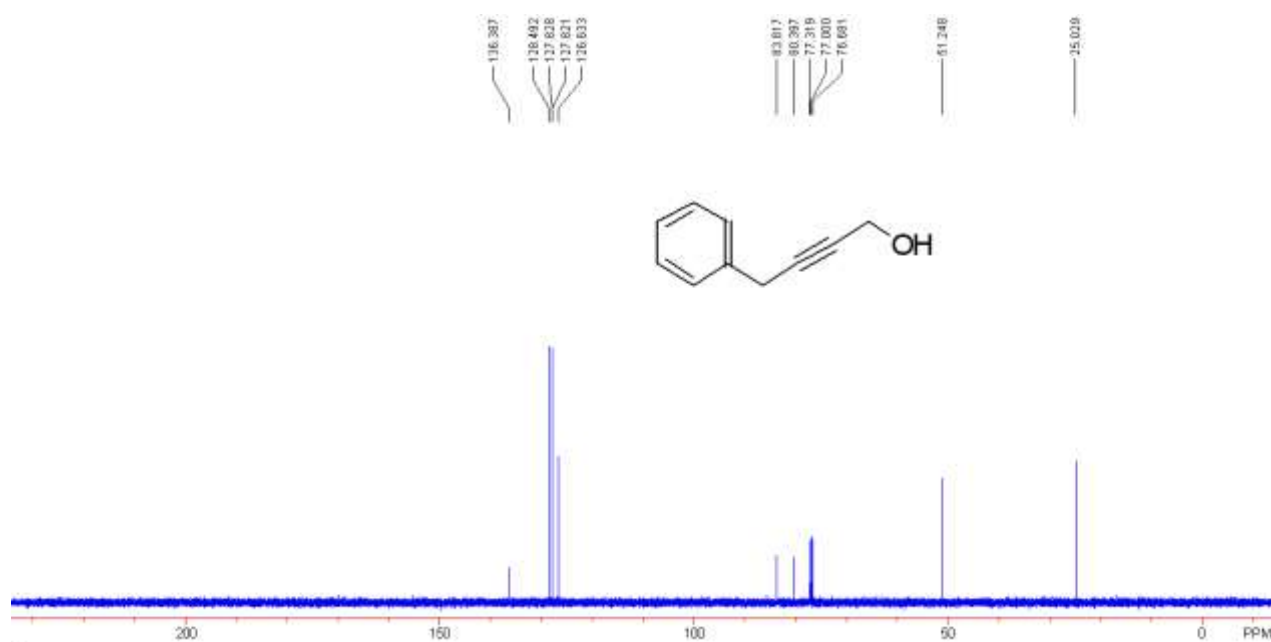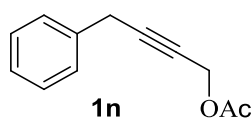

**4-phenylbut-2-ynyl acetate 1n**: Following the general procedure, the mixture was purified by column chromatography using silica gel to give the target product **1n** (50% yield). A colorless oil. IR (CH<sub>2</sub>Cl<sub>2</sub>):  $\nu$  2954, 2923, 2852, 1850, 1745, 1643, 1602, 1496, 1454, 1375, 1219, 1145, 1044, 832, 758 cm<sup>-1</sup>; <sup>1</sup>H NMR (400 MHz, CDCl<sub>3</sub>, TMS):  $\delta$  7.33-7.23 (5H, m), 4.73 (2H, t, *J* = 2.0 Hz), 3.65 (2H, t, *J* = 2.0 Hz), 2.10 (3H, s); <sup>13</sup>C NMR (CDCl<sub>3</sub>, 100 MHz):  $\delta$  170.4, 136.0, 128.5, 127.9, 126.7, 84.9, 76.1, 52.7, 25.1, 20.8; MS (%) *m/e* 188 (2), 146 (48), 128 (100), 115 (25), 102 (21), 91 (12), 77

(14), 63 (11); HRMS (EI) for  $C_{12}H_{12}O_2$ : 188.0837; Found: 188.0833.

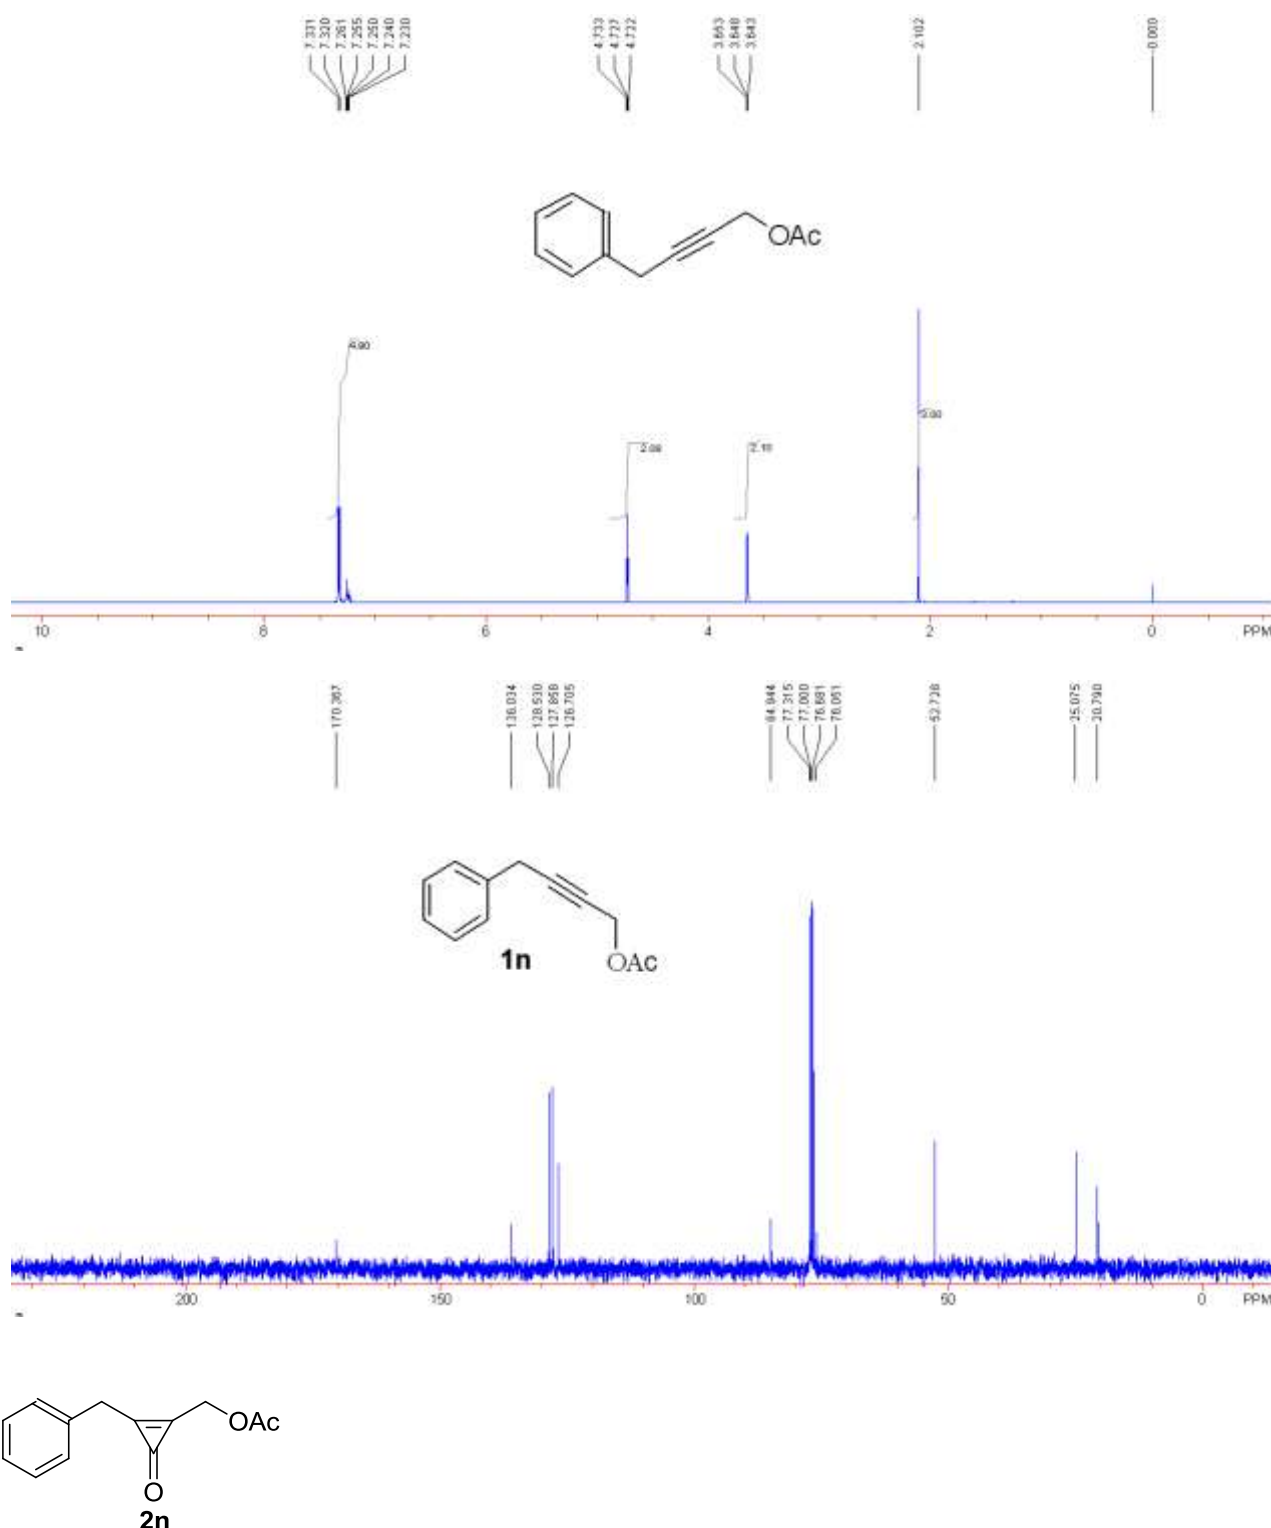

**(2-benzyl-3-oxocycloprop-1-enyl)methyl acetate 2n**: Following the general procedure, the mixture was purified by column chromatography using silica gel to give the target product **2n** (30% yield). A colorless oil. IR (CH<sub>2</sub>Cl<sub>2</sub>):  $\nu$  2962, 1850, 1744, 1641, 1496, 1454, 1414, 1258, 1219, 1016, 863, 795, 731 cm<sup>-1</sup>; <sup>1</sup>H NMR (400 MHz, CDCl<sub>3</sub>, TMS):  $\delta$  7.38 (2H, d,  $J$  = 7.2 Hz), 7.35-7.26 (3H, m), 4.99 (2H, s), 3.97 (2H, s), 1.97 (3H, s); <sup>13</sup>C NMR (CDCl<sub>3</sub>, 100 MHz):  $\delta$  170.1, 158.3, 156.4, 155.7, 133.9,



129.0, 128.4, 127.4, 58.8, 32.7, 20.2; MS (ESI)  $m/e$  217.1 ( $M^+ + H$ ); HRMS (ESI) for  $C_{13}H_{12}O_3$  ( $M^+$ ): 216.0786, Found: 216.0790.

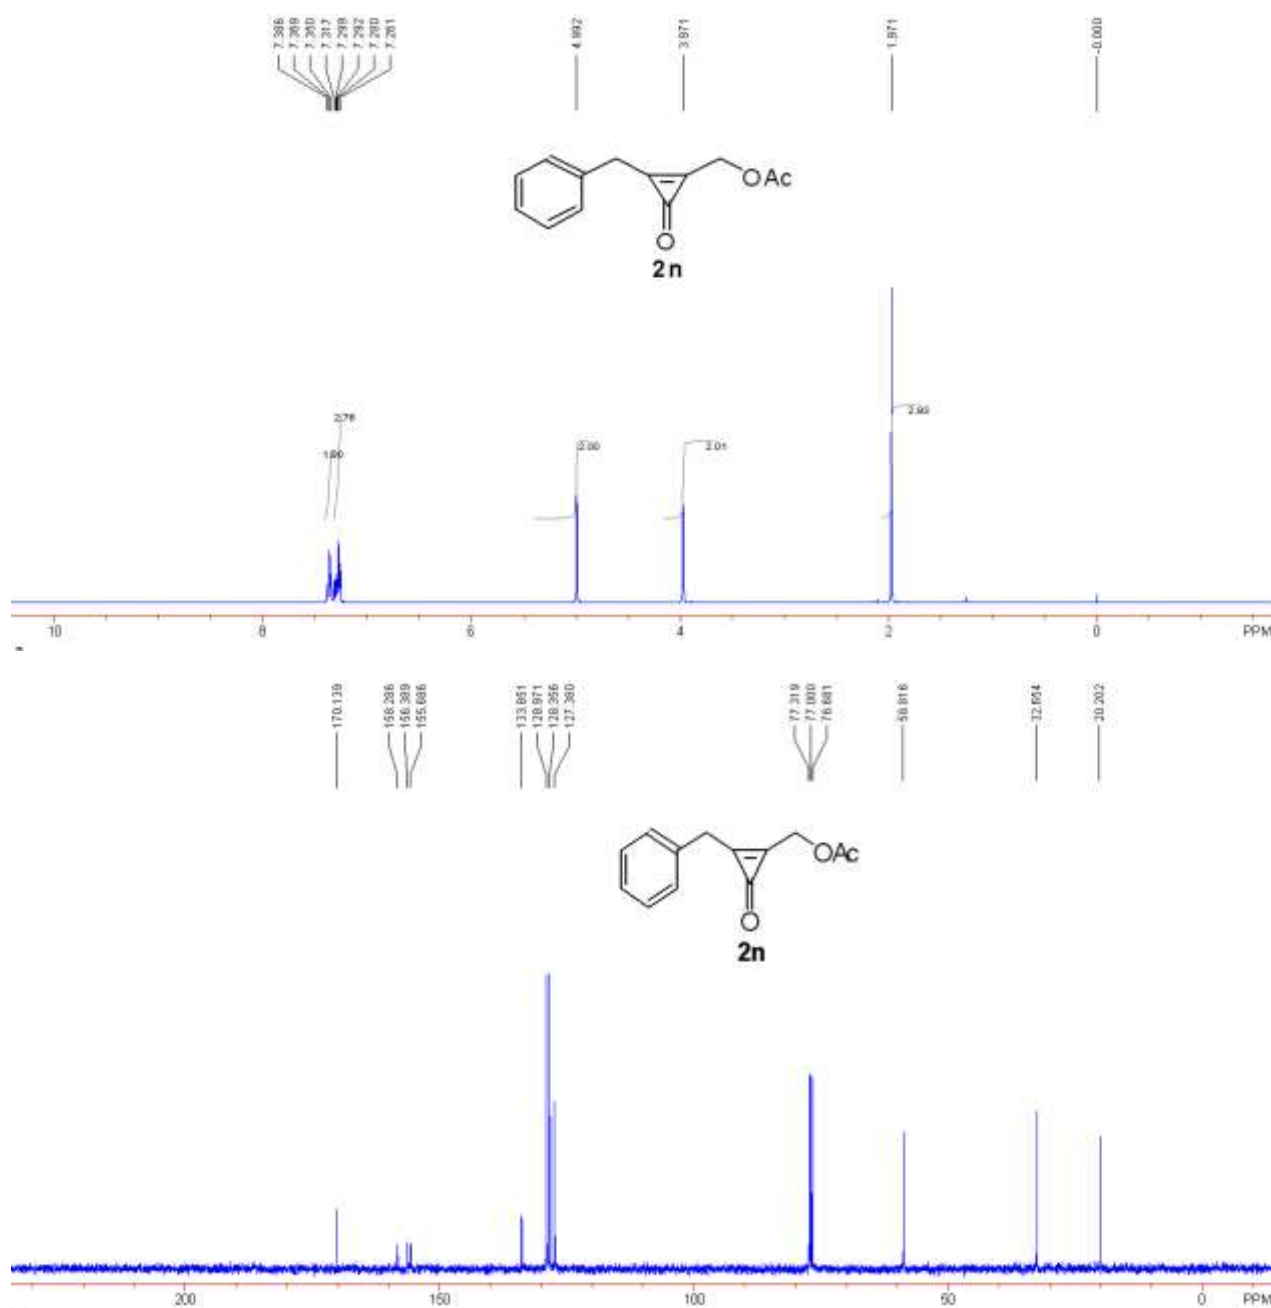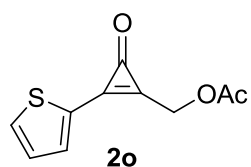

**(3-oxo-2-(thiophen-2-yl)cycloprop-1-enyl)methyl acetate 2o**: Following the general procedure, the mixture was purified by column chromatography using silica gel to give the target product **2o** (45% yield). A yellow solid. m.p. for **2o** = 109-111 °C; IR (CH<sub>2</sub>Cl<sub>2</sub>): ν 3088, 2928, 1850, 1743, 1627, 1409,

1378, 1365, 1215, 1037, 928, 853  $\text{cm}^{-1}$ ;  $^1\text{H}$  NMR (400 MHz,  $\text{CDCl}_3$ , TMS):  $\delta$  7.79 (2H, dd,  $J_1 = 8.0$  Hz,  $J_2 = 4.0$  Hz), 7.25 (1H, dd,  $J_1 = 4.8$  Hz,  $J_2 = 4.0$  Hz), 5.23 (2H, s), 2.29 (3H, s);  $^{13}\text{C}$  NMR ( $\text{CDCl}_3$ , 100 MHz):  $\delta$  170.0, 150.8, 146.4, 142.0, 136.9, 134.9, 128.8, 123.8, 59.1, 20.6; MS (ESI)  $m/e$  209.0 ( $\text{M}^+ + \text{H}$ ); HRMS (ESI) for  $\text{C}_{10}\text{H}_8\text{O}_3\text{S}$  ( $\text{M}^+$ ): 208.0194, Found: 208.0203.

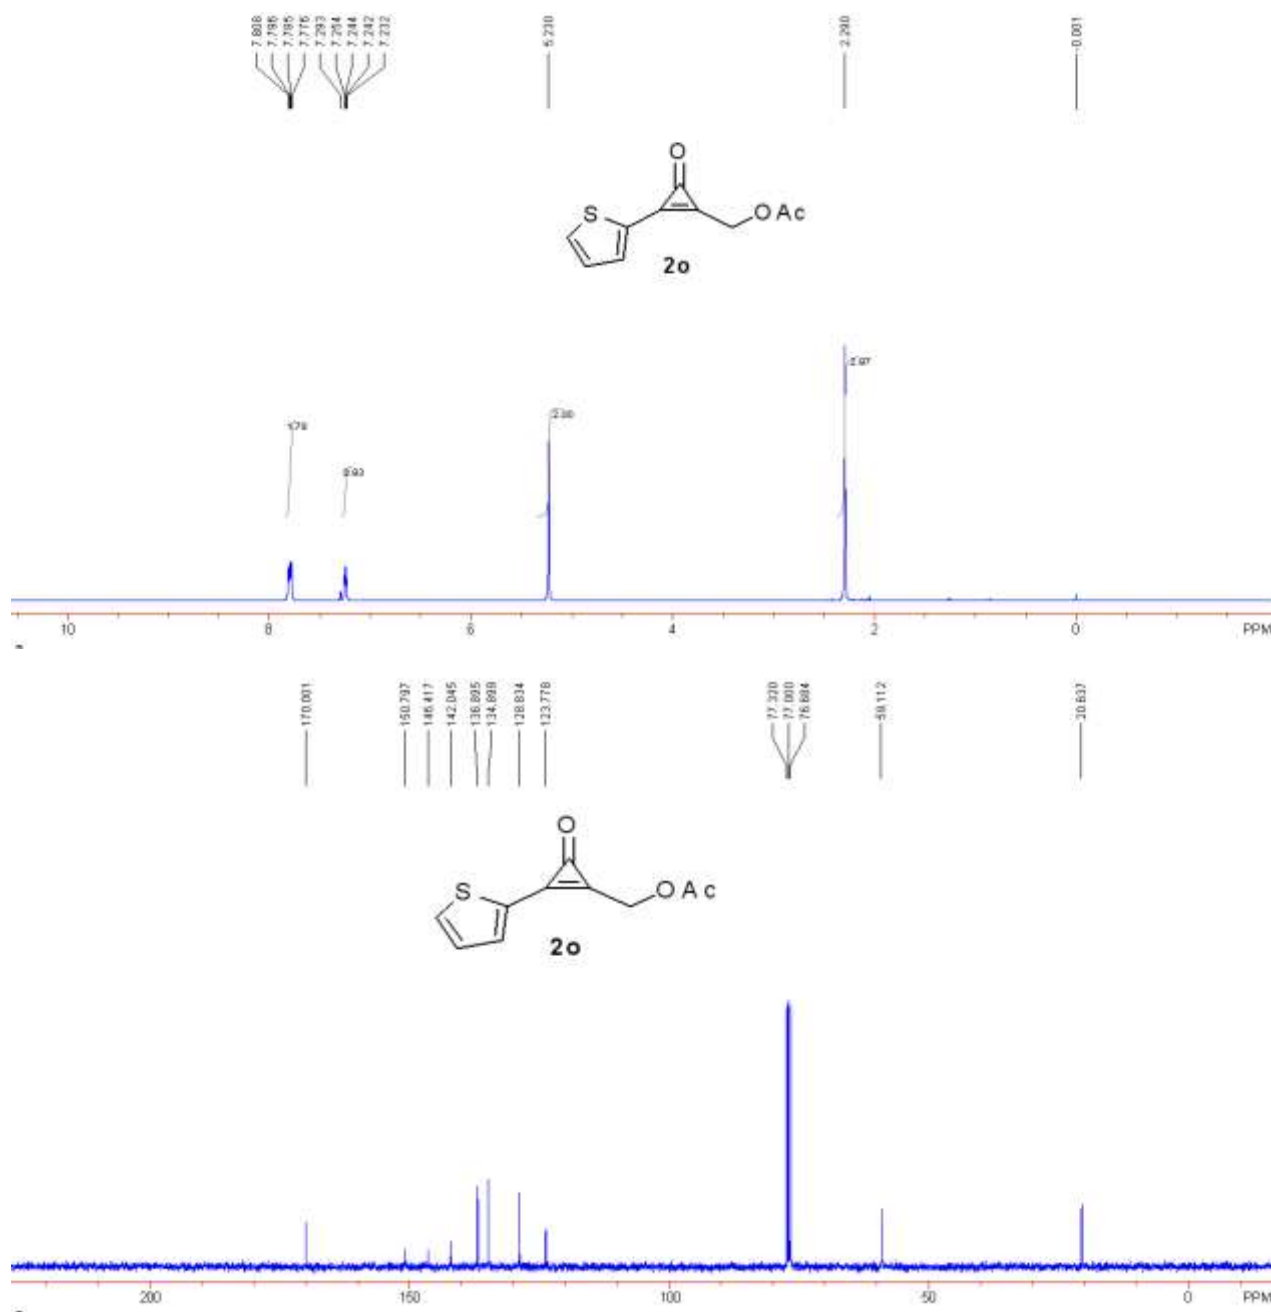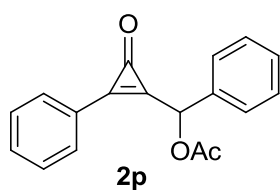

(3-oxo-2-phenylcycloprop-1-en-1-yl)(phenyl)methyl acetate **2p**: This is a known compound.<sup>[2]</sup> A

yellow solid.  $^1\text{H}$  NMR (400 MHz,  $\text{CDCl}_3$ , TMS):  $\delta$  7.76-7.73 (2H, m), 7.58-7.55 (1H, m), 7.52-7.48 (4H, m), 7.46-7.41 (3H, m), 6.91 (1H, s), 2.24 (3H, s);  $^{13}\text{C}$  NMR ( $\text{CDCl}_3$ , 100 MHz):  $\delta$  169.6, 153.8, 153.5, 151.2, 134.2, 133.2, 131.8, 129.6, 129.3, 129.26, 127.6, 122.8, 71.7, 20.9.

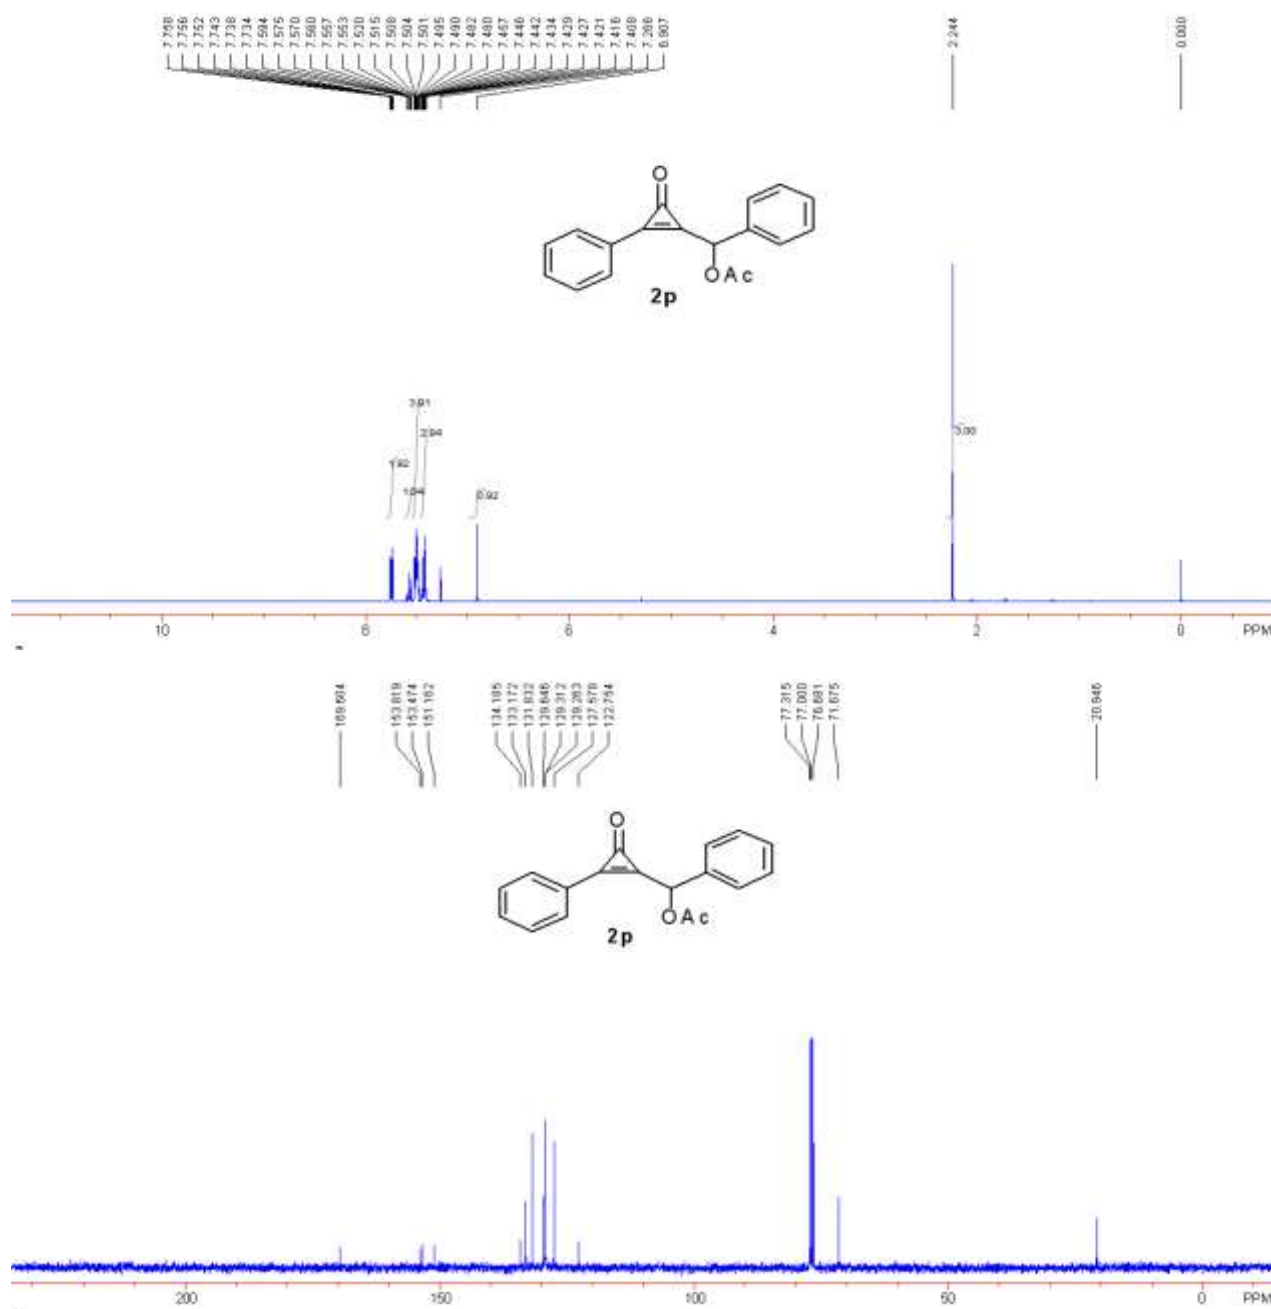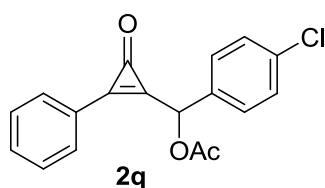

**(4-chlorophenyl)(3-oxo-2-phenylcycloprop-1-enyl)methyl acetate 2q:** This is a known compound.<sup>[2]</sup> A yellow solid.  $^1\text{H}$  NMR (400 MHz,  $\text{CDCl}_3$ , TMS):  $\delta$  7.78-7.76 (2H, m), 7.61-7.57 (1H,

m), 7.54-7.50 (2H, m), 7.46-7.39 (4H, m), 6.88 (1H, s), 2.25 (3H, s);  $^{13}\text{C}$  NMR ( $\text{CDCl}_3$ , 100 MHz):  $\delta$  169.5, 153.8, 153.6, 150.5, 135.7, 133.3, 132.7, 131.8, 129.5, 129.4, 129.0, 122.6, 70.9, 20.9.

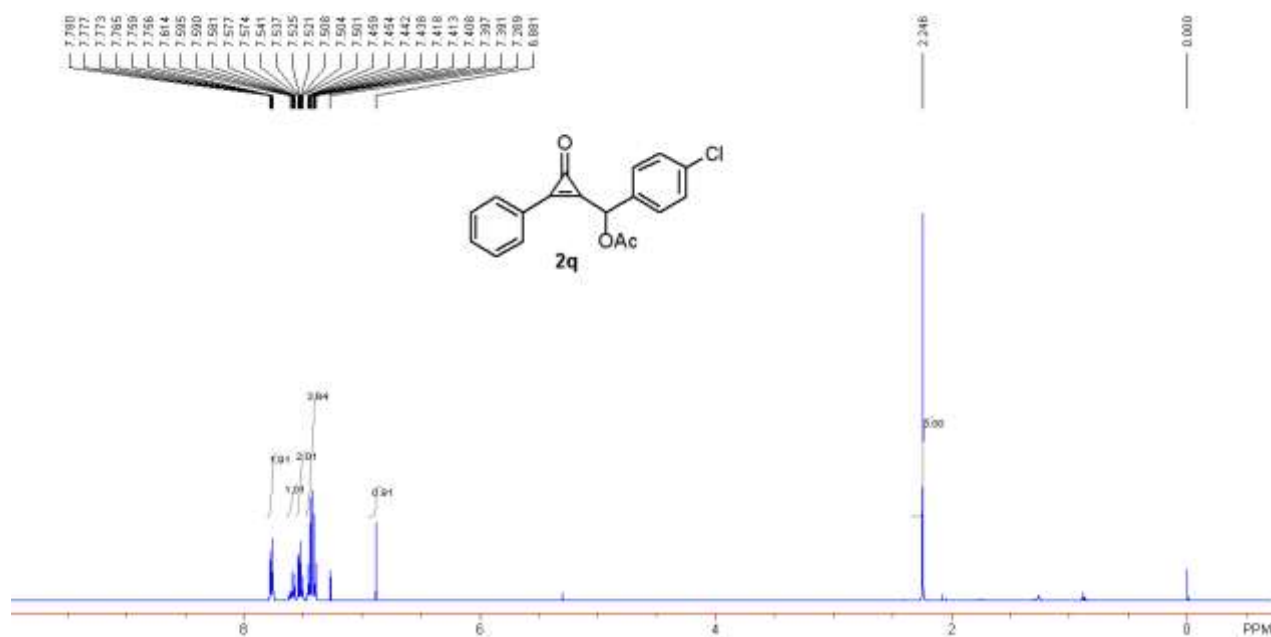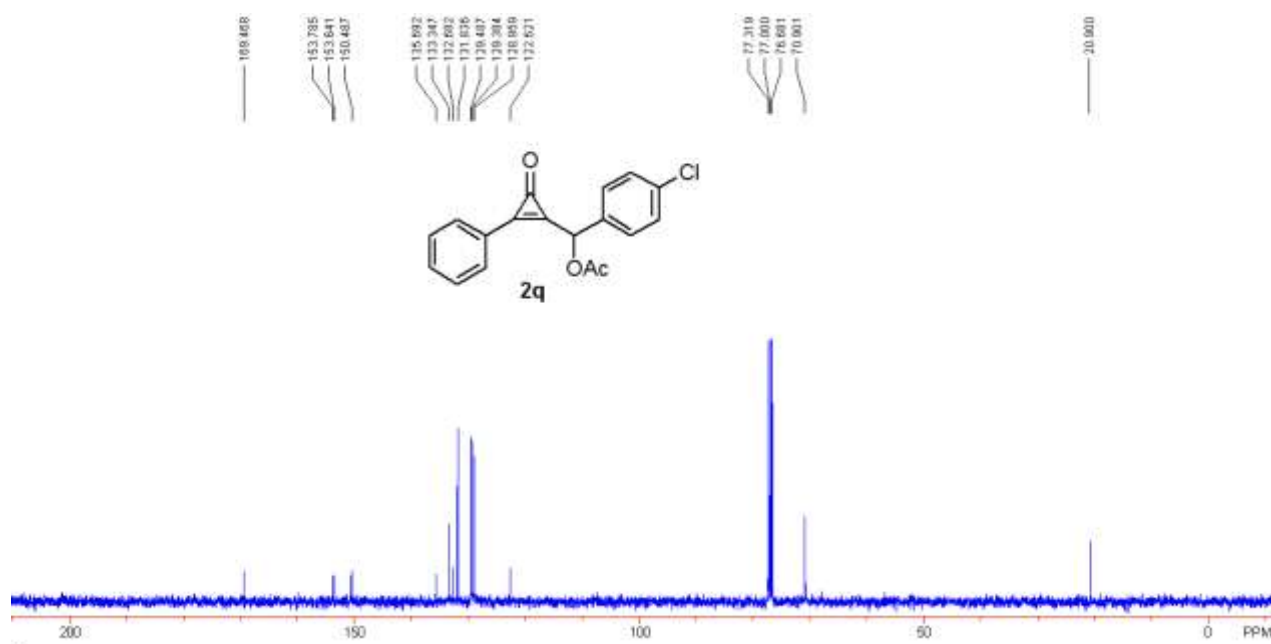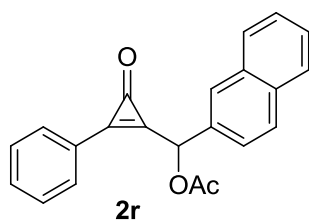

**naphthalen-2-yl(3-oxo-2-phenylcycloprop-1-enyl)methyl acetate 2r**: Following the general procedure, the mixture was purified by column chromatography using silica gel to give the target

product **2r** (52% yield). A yellow solid. m.p. for **2r** = 161-162 °C; IR (CH<sub>2</sub>Cl<sub>2</sub>):  $\nu$  3057, 2961, 1854, 1744, 1637, 1508, 1488, 1448, 1369, 1218, 1168, 1125, 1022, 934, 816, 764 cm<sup>-1</sup>; <sup>1</sup>H NMR (400 MHz, CDCl<sub>3</sub>, TMS):  $\delta$  7.98 (1H, s), 7.91-7.83 (3H, m), 7.79-7.63 (2H, m), 7.58-7.46 (6H, m), 7.08 (1H, s), 2.26 (3H, s); <sup>13</sup>C NMR (CDCl<sub>3</sub>, 100 MHz):  $\delta$  169.6, 153.8, 153.5, 151.1, 133.5, 133.2, 133.0, 131.8, 131.4, 129.3, 129.29, 128.2, 127.7, 127.3, 127.0, 126.8, 124.4, 122.7, 71.9, 20.9; MS (ESI) m/e 679.2 (2M<sup>+</sup>+Na); HRMS (ESI) for C<sub>22</sub>H<sub>16</sub>O<sub>3</sub>Na (M<sup>+</sup>+Na): 351.0992, Found: 351.0995.

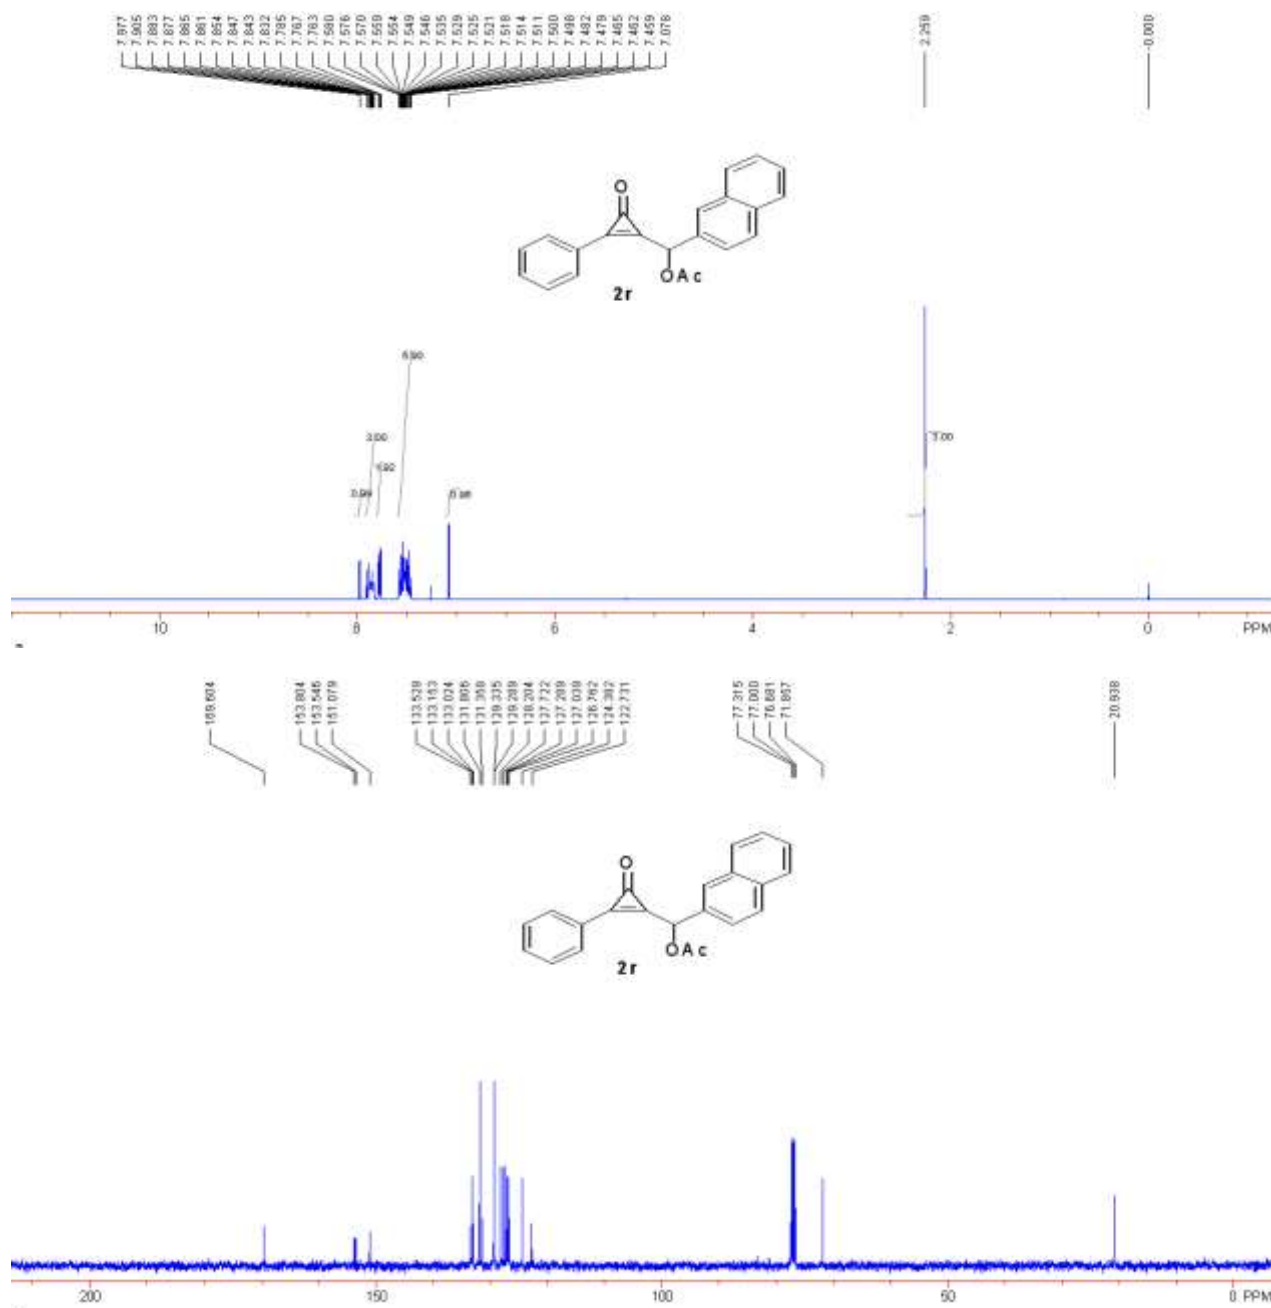

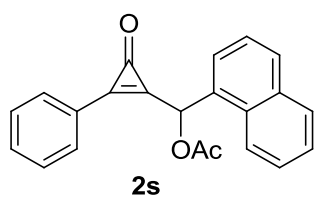

**naphthalen-1-yl(3-oxo-2-phenylcycloprop-1-enyl)methyl acetate 2s:** Following the general procedure, the mixture was purified by column chromatography using silica gel to give the target product **2s** (40% yield). A yellow solid. m.p. for **2s** = 118-120 °C; IR (CH<sub>2</sub>Cl<sub>2</sub>):  $\nu$  3062, 1853, 1731, 1640, 1508, 1488, 1446, 1366, 1285, 1218, 1168, 1123, 1077, 1015, 934, 858 cm<sup>-1</sup>; <sup>1</sup>H NMR (400 MHz, CDCl<sub>3</sub>, TMS):  $\delta$  8.16 (1H, d,  $J$  = 8.1 Hz), 7.91 (2H, t,  $J$  = 9.2 Hz), 7.71 (1H, d,  $J$  = 6.8 Hz), 7.60-7.57 (3H, m), 7.55-7.49 (4H, m), 7.43-7.39 (2H, m), 2.24 (3H, s); <sup>13</sup>C NMR (CDCl<sub>3</sub>, 100 MHz):  $\delta$  169.7, 153.8, 153.6, 151.6, 134.0, 133.0, 131.8, 130.6, 130.4, 130.0, 129.2, 129.0, 127.3, 126.9, 126.4, 125.2, 123.3, 122.7, 70.5, 20.9; MS (ESI)  $m/e$  329.1 (M<sup>+</sup>+H); HRMS (ESI) for C<sub>22</sub>H<sub>17</sub>O<sub>3</sub> (M<sup>+</sup>+H): 329.1172, Found: 329.1169.

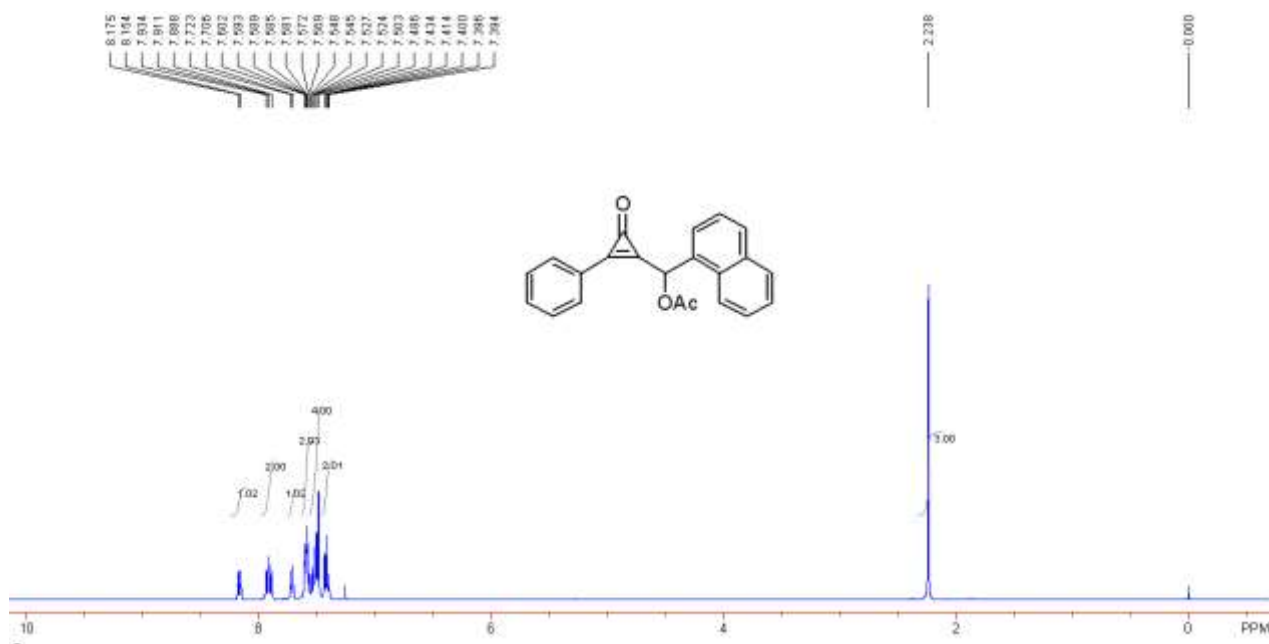

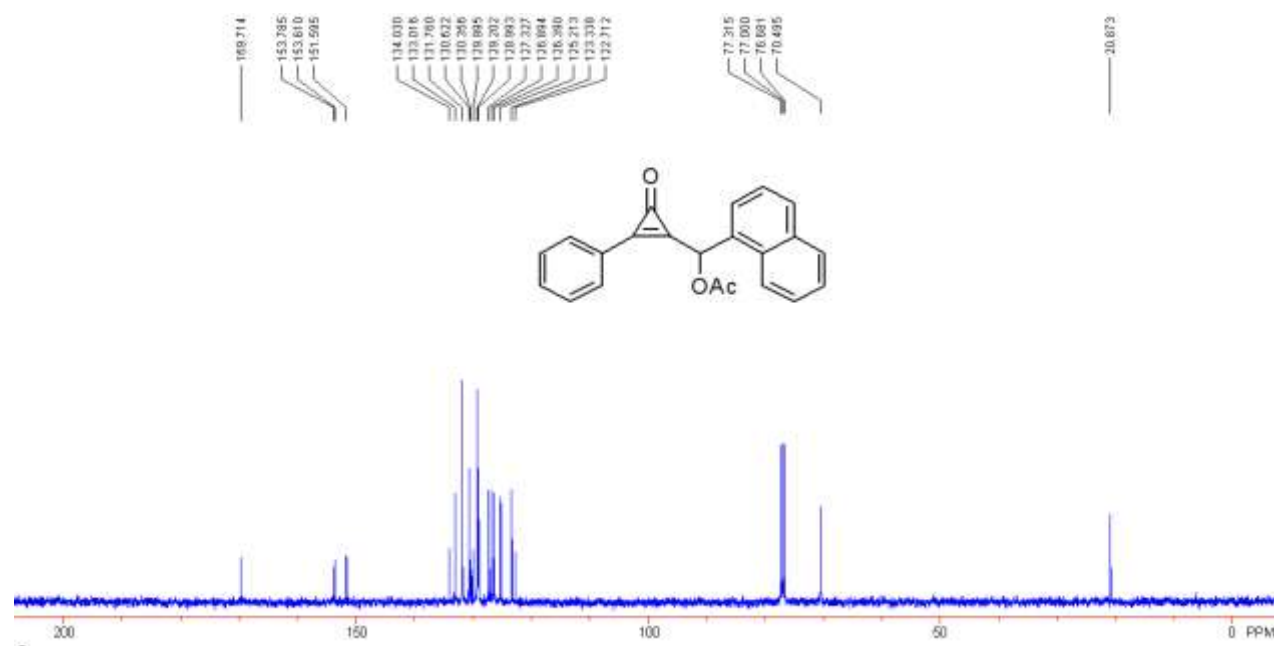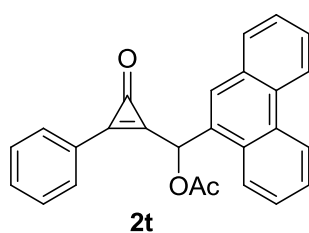

**(3-oxo-2-phenylcycloprop-1-enyl)(phenanthren-9-yl)methyl acetate 2t**: Following the general procedure, the mixture was purified by column chromatography using silica gel to give the target product **2t** (46% yield). A white solid. m.p. for **2t** = 177-179 °C; IR (CH<sub>2</sub>Cl<sub>2</sub>):  $\nu$  2924, 2853, 1854, 1746, 1636, 1530, 1488, 1448, 1370, 1260, 1217, 1175, 1094, 1019, 974, 766 cm<sup>-1</sup>; <sup>1</sup>H NMR (400 MHz, CDCl<sub>3</sub>, TMS):  $\delta$  8.76 (1H, d,  $J$  = 9.2 Hz), 8.68 (1H, d,  $J$  = 8.4 Hz), 8.20 (1H, d,  $J$  = 9.2 Hz), 8.00 (1H, s), 7.30 (1H, d,  $J$  = 7.2 Hz), 7.74-7.62 (6H, m), 7.53-7.48 (2H, m), 7.43-7.39 (2H, m), 2.27 (3H, s); <sup>13</sup>C NMR (CDCl<sub>3</sub>, 100 MHz):  $\delta$  169.8, 154.0, 151.6, 133.1, 131.9, 131.1, 131.0, 130.7, 129.3, 129.2, 128.8, 128.6, 128.5, 128.0, 127.5, 127.2, 127.1, 124.3, 123.5, 122.8, 122.6, 71.0, 21.0; MS (ESI)  $m/e$  319.1 (M-OAc); HRMS (ESI) for C<sub>24</sub>H<sub>15</sub>O (M-OAc): 319.1117, Found: 319.1120.

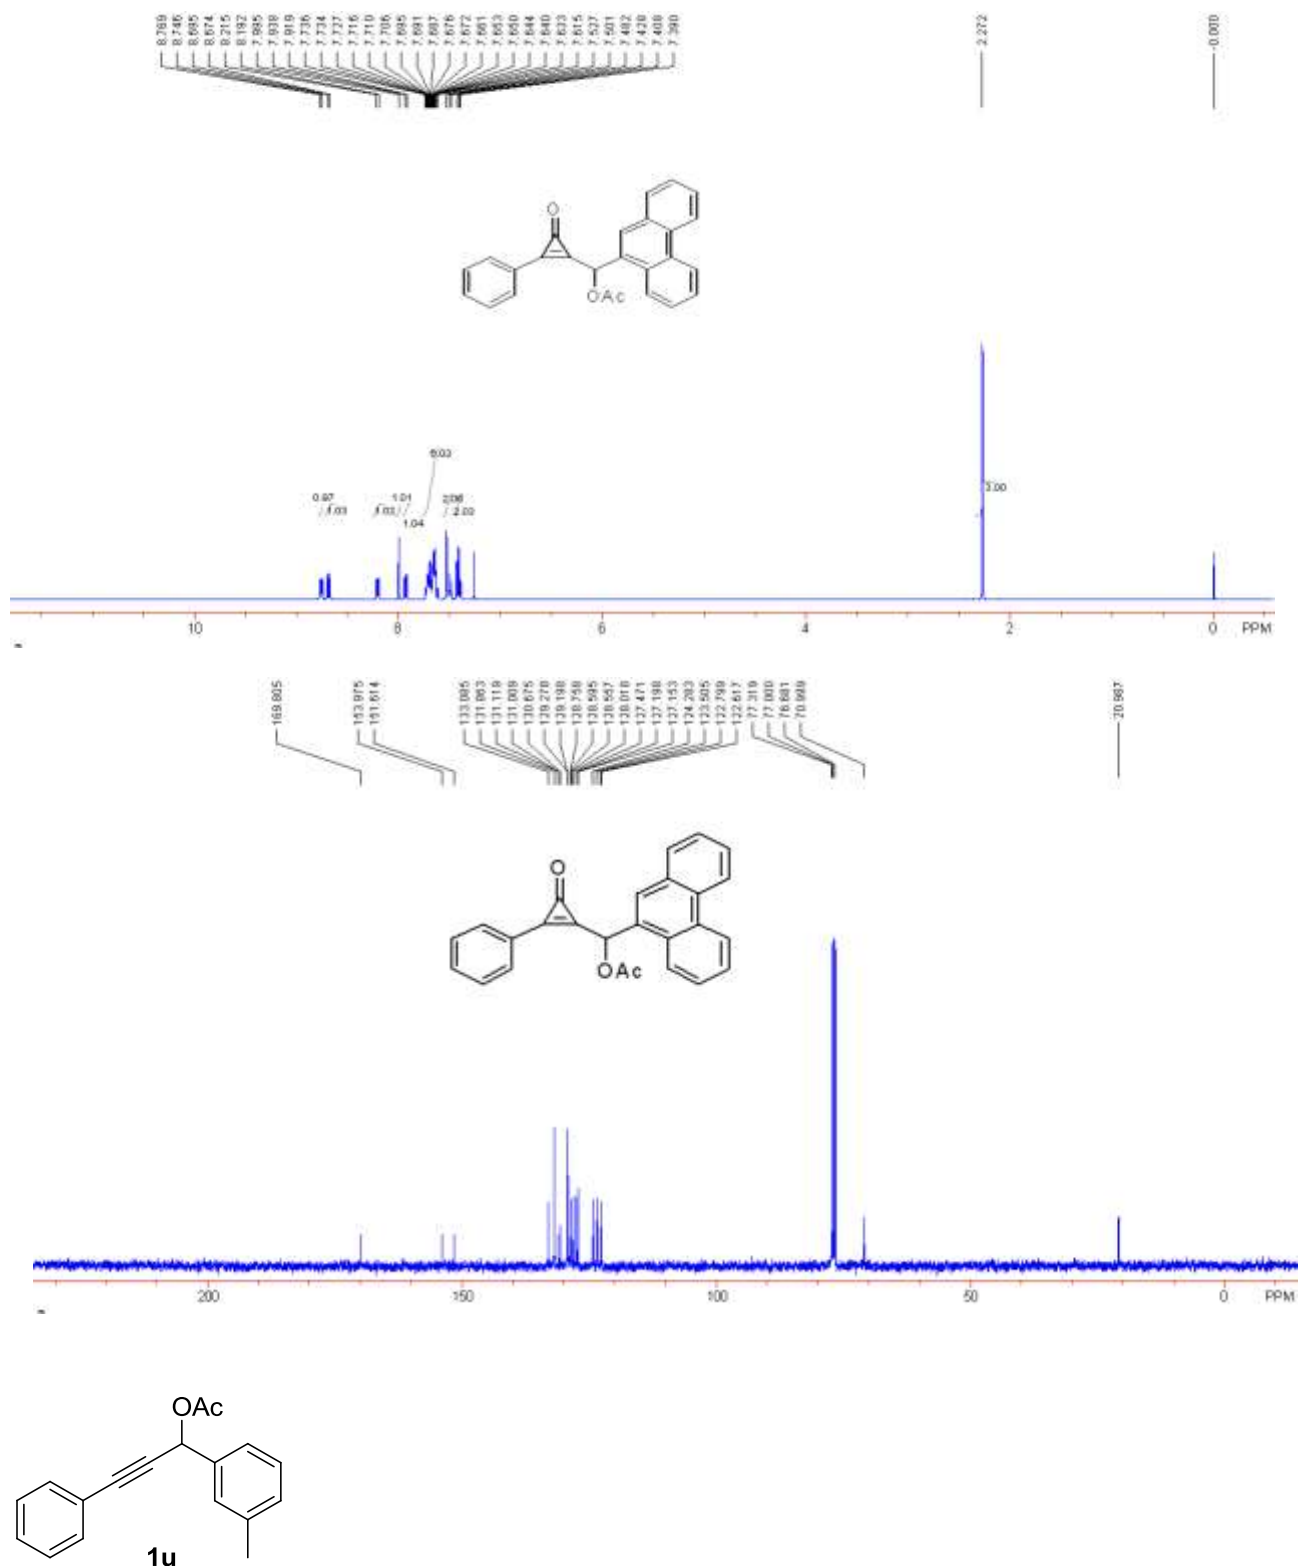

**3-phenyl-1-m-tolylprop-2-ynyl acetate 1u:** Following the general procedure, the mixture was purified by column chromatography using silica gel to give the target product **1u** (81% yield). A colorless oil. IR (CH<sub>2</sub>Cl<sub>2</sub>): ν 2923, 1739, 1608, 1490, 1443, 1368, 1332, 1259, 1218, 1153, 1012, 955, 915, 881 cm<sup>-1</sup>; <sup>1</sup>H NMR (400 MHz, CDCl<sub>3</sub>, TMS): δ 7.49-7.47 (2H, m), 7.41-7.40 (2H, m), 7.33-7.28 (4H, s), 7.18 (1H, d, *J* = 7.2 Hz), 6.67 (1H, s), 2.39 (3H, s), 2.13 (3H, s); <sup>13</sup>C NMR (CDCl<sub>3</sub>,



100 MHz):  $\delta$  169.8, 138.4, 137.0, 131.9, 129.7, 128.7, 128.6, 128.4, 128.2, 124.8, 122.1, 86.9, 85.6, 66.1, 21.4, 21.1; MS (%)  $m/e$  264 (60), 222 (100), 205 (72), 189 (39), 178 (37), 165 (9), 144 (11), 130 (13); HRMS (EI) for  $C_{18}H_{16}O_2$ : 264.1150; Found: 264.1151.

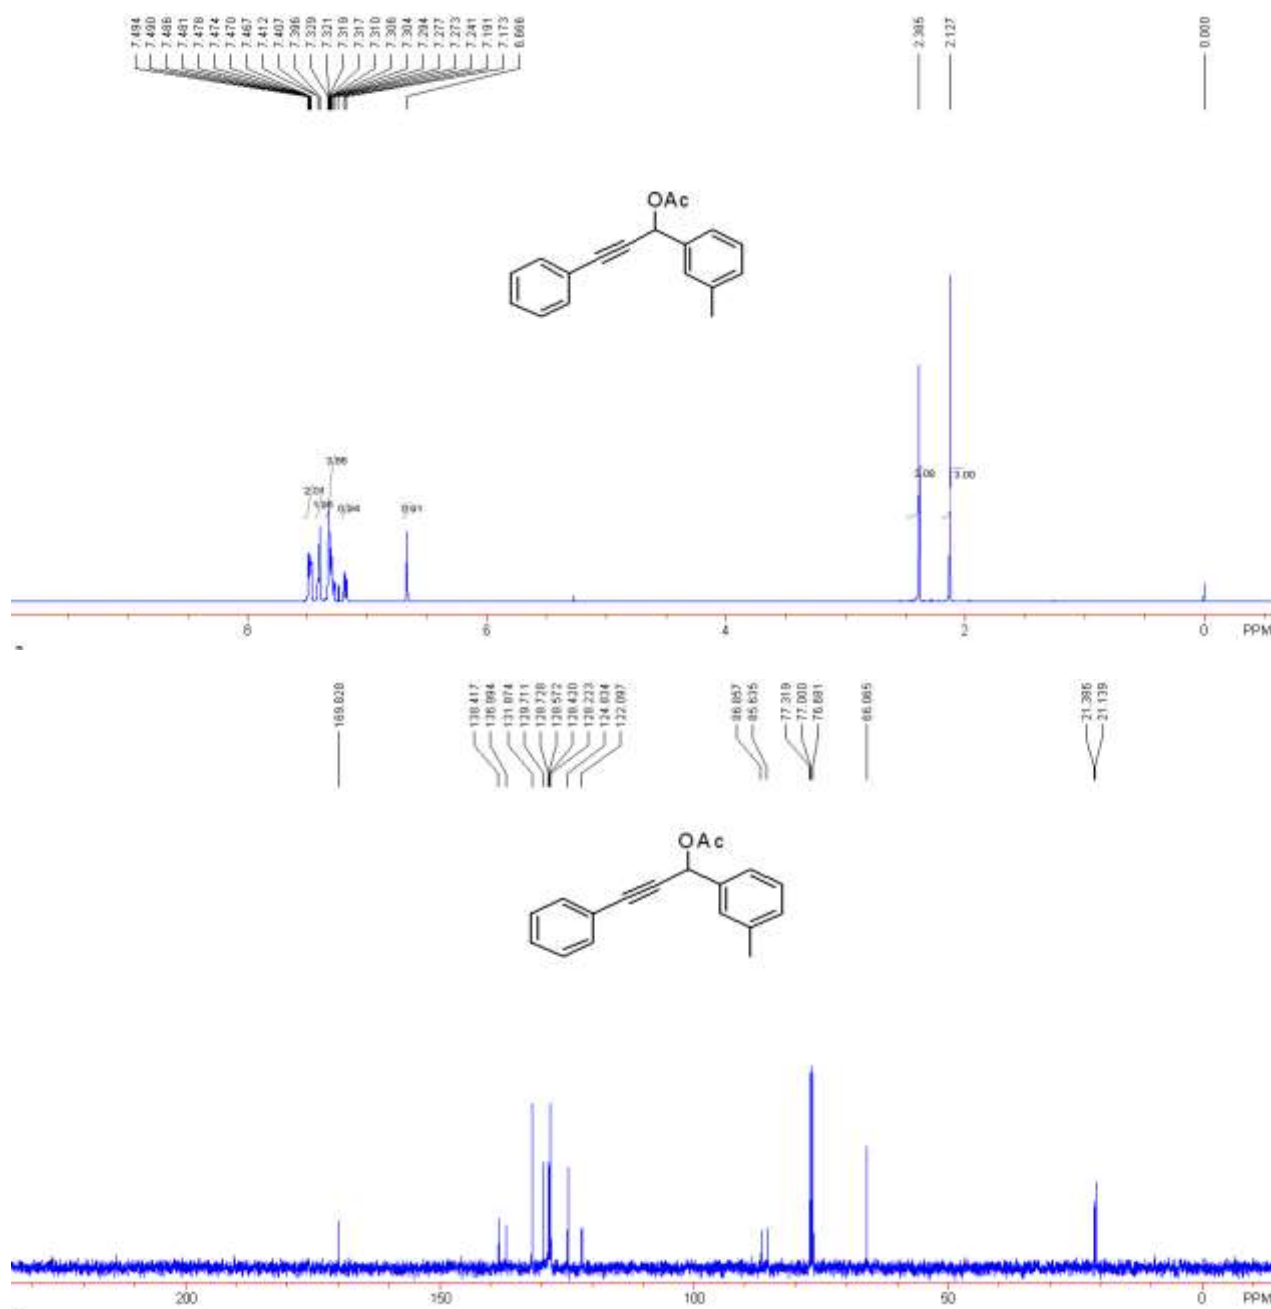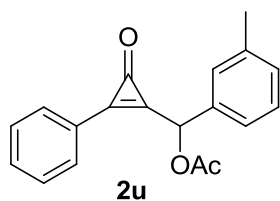

**(3-oxo-2-phenylcycloprop-1-enyl)(m-tolyl)methyl acetate 2u**: Following the general procedure, the mixture was purified by column chromatography using silica gel to give the target product **2u**.

(46% yield). A yellow solid. m.p. for **2u** = 59-61 °C; IR (CH<sub>2</sub>Cl<sub>2</sub>):  $\nu$  2923, 1851, 1743, 1636, 1488, 1448, 1370, 1175, 1156, 974, 763 cm<sup>-1</sup>; <sup>1</sup>H NMR (400 MHz, CDCl<sub>3</sub>, TMS):  $\delta$  7.77-7.74 (2H, m), 7.59-7.55 (1H, m), 7.52-7.48 (2H, m), 7.33-7.21 (4H, m), 6.87 (1H, s), 2.37 (3H, s), 2.24 (3H, s); <sup>13</sup>C NMR (CDCl<sub>3</sub>, 100 MHz):  $\delta$  169.6, 153.9, 153.3, 151.3, 139.1, 134.0, 133.1, 131.8, 130.4, 129.3, 129.1, 128.2, 124.6, 122.8, 71.8, 21.4, 21.0; MS (ESI)  $m/e$  293.1 (M<sup>+</sup>+H); HRMS (ESI) for C<sub>19</sub>H<sub>16</sub>O<sub>3</sub> (M<sup>+</sup>): 292.1099, Found: 292.1108.

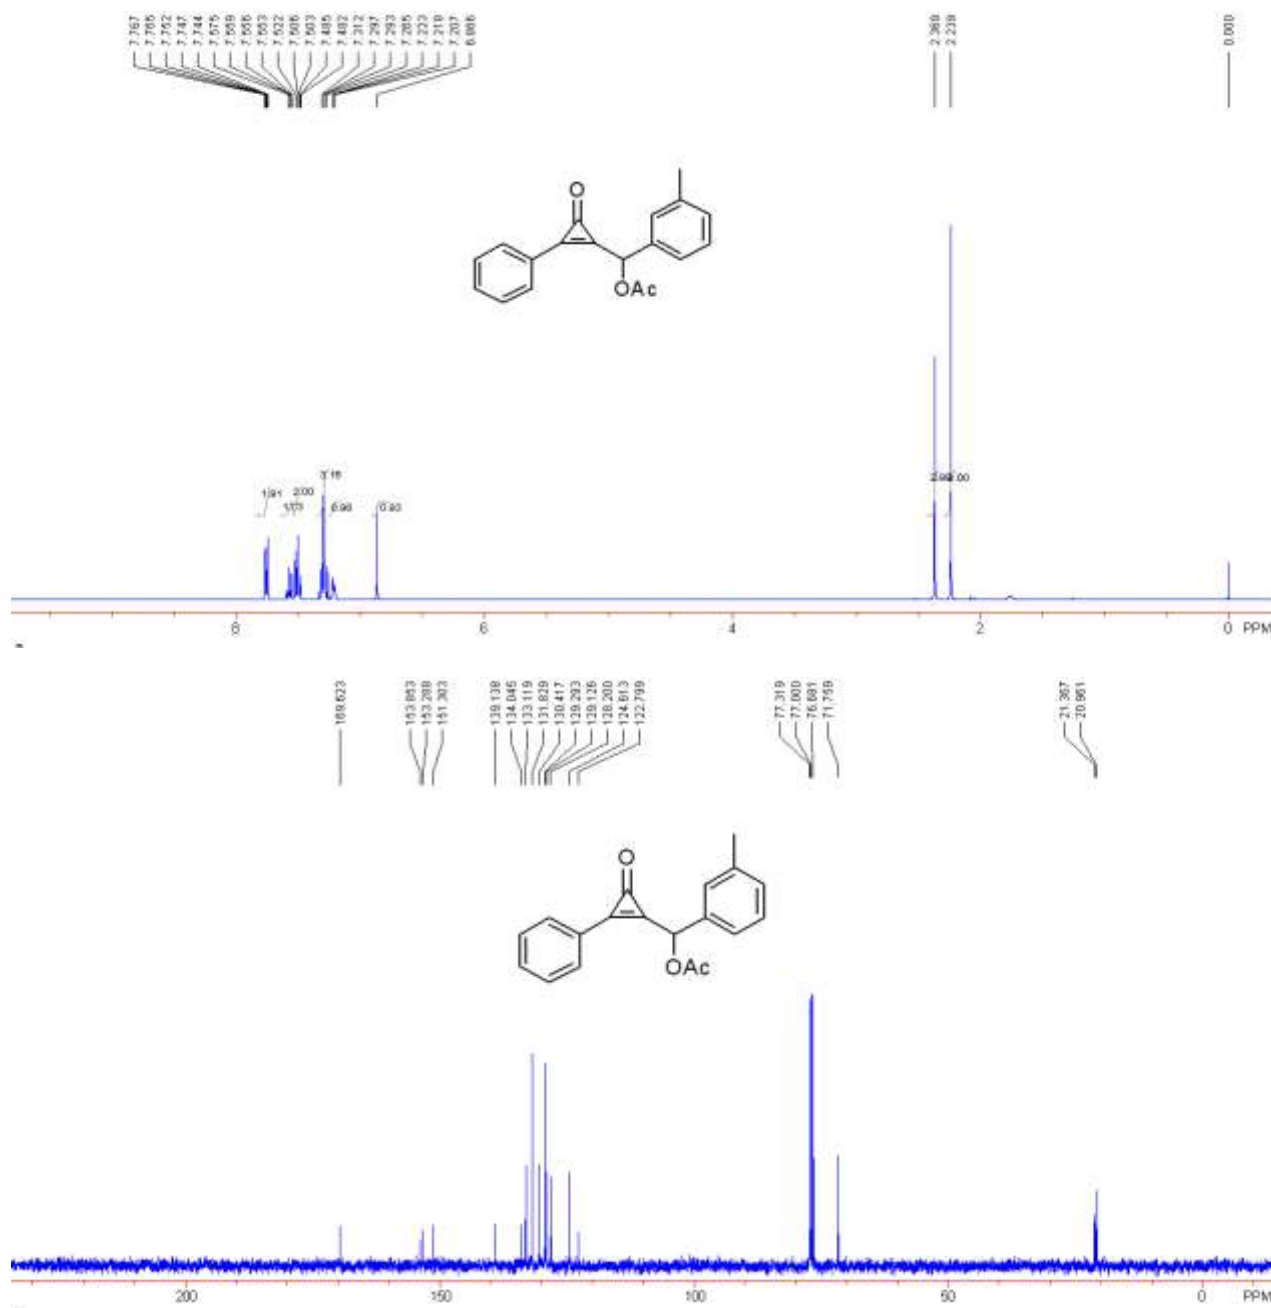

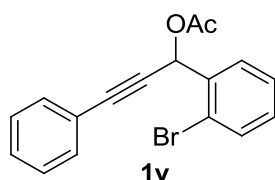

**1-(2-bromophenyl)-3-phenylprop-2-ynyl acetate 1v:** Following the general procedure, the mixture was purified by column chromatography using silica gel to give the target product **1v** (80% yield). A colorless oil. IR (CH<sub>2</sub>Cl<sub>2</sub>):  $\nu$  3061, 2228, 1741, 1570, 1490, 1470, 1441, 1368, 1334, 1213, 1120, 1070, 1014, 954, 912 cm<sup>-1</sup>; <sup>1</sup>H NMR (400 MHz, CDCl<sub>3</sub>, TMS):  $\delta$  7.86 (1H, dd,  $J_1$  = 8.0 Hz,  $J_2$  = 1.6 Hz), 7.60 (1H, dd,  $J_1$  = 8.0 Hz,  $J_2$  = 1.2 Hz), 7.50-7.47 (2H, m), 7.41-7.37 (1H, m), 7.34-7.29 (3H, m), 7.26-7.22 (1H, m), 6.92 (1H, s), 2.15 (3H, s); <sup>13</sup>C NMR (CDCl<sub>3</sub>, 100 MHz):  $\delta$  169.4, 136.1, 133.1, 131.9, 130.5, 129.7, 128.9, 128.2, 127.7, 123.4, 121.9, 87.4, 84.6, 65.6, 20.9; MS (%)  $m/e$  328 (31), 288 (40), 269 (27), 259 (10), 207 (89), 189 (100), 178 (61); HRMS (EI) for C<sub>17</sub>H<sub>13</sub>O<sub>2</sub>Br: 328.0099; Found: 328.0102.

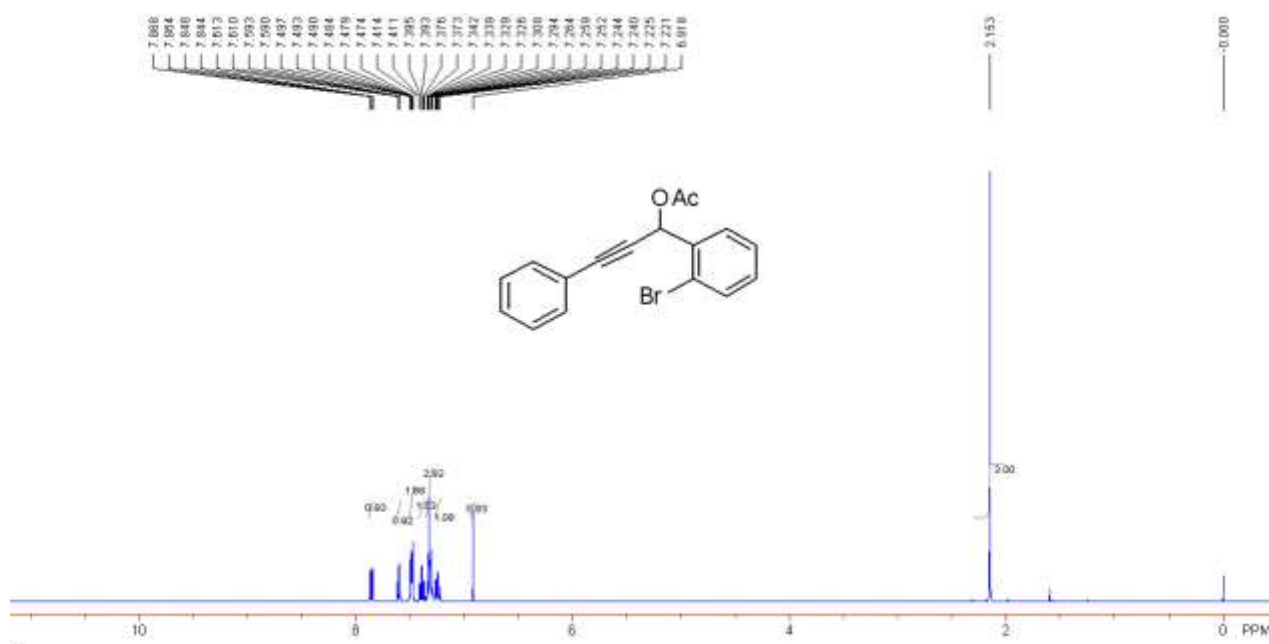

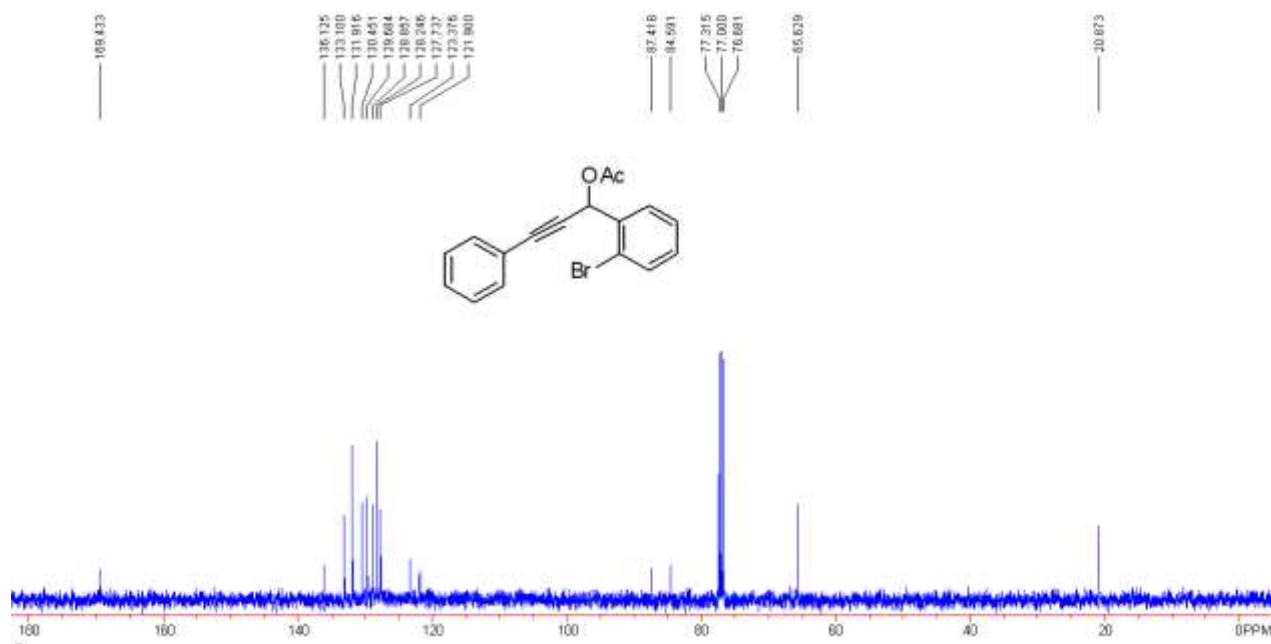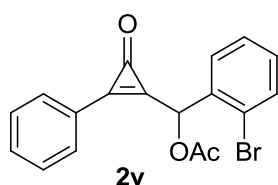

**(2-bromophenyl)(3-oxo-2-phenylcycloprop-1-enyl)methyl acetate 2v**: Following the general procedure, the mixture was purified by column chromatography using silica gel to give the target product **2v** (51% yield). A yellow solid. m.p. for **2v** = 102-104 °C; IR (CH<sub>2</sub>Cl<sub>2</sub>): ν 3058, 1854, 1746, 1636, 1488, 1448, 1370, 1265, 1213, 1122, 1022, 927 cm<sup>-1</sup>; <sup>1</sup>H NMR (400 MHz, CDCl<sub>3</sub>, TMS): δ 7.75 (2H, d, *J* = 7.2 Hz), 7.66 (1H, d, *J* = 7.2 Hz), 7.59-7.55 (2H, m), 7.50 (2H, t, *J* = 7.2 Hz), 7.39 (1H, t, *J* = 7.2 Hz), 7.31-7.27 (1H, m), 7.19 (1H, s), 2.25 (3H, s); <sup>13</sup>C NMR (CDCl<sub>3</sub>, 100 MHz): δ 169.3, 154.2, 153.7, 149.8, 133.7, 133.5, 133.2, 131.8, 131.0, 129.4, 129.3, 128.2, 123.0, 122.7, 70.8, 20.7; MS (ESI) *m/e* 357.0 (M<sup>+</sup>+H); HRMS (ESI) for C<sub>18</sub>H<sub>13</sub>O<sub>3</sub>Br (M<sup>+</sup>): 356.0048, Found: 356.0055.

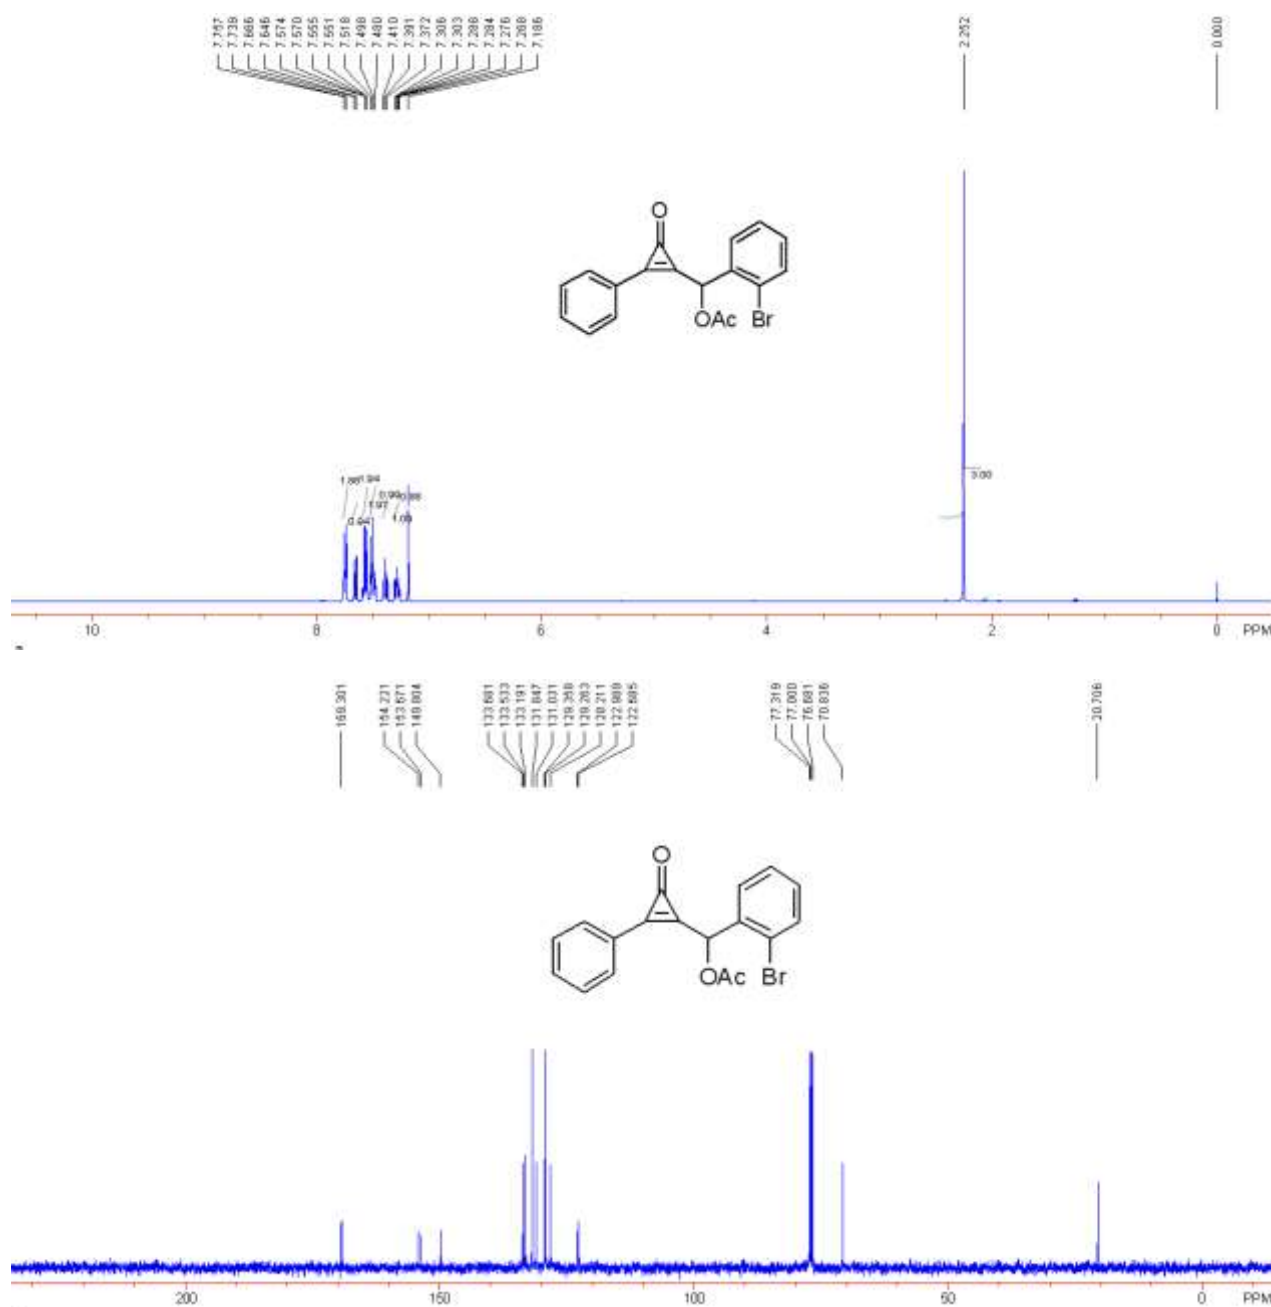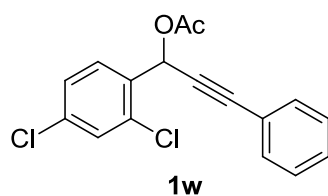

**1-(2,4-dichlorophenyl)-3-phenylprop-2-ynyl acetate 1w:** Following the general procedure, the mixture was purified by column chromatography using silica gel to give the target product **1w** (95% yield). A yellow oil. IR (CH<sub>2</sub>Cl<sub>2</sub>):  $\nu$  2962, 2230, 1746, 1589, 1563, 1490, 1471, 1368, 1216, 1139, 1102, 1057, 954, 913 cm<sup>-1</sup>; <sup>1</sup>H NMR (400 MHz, CDCl<sub>3</sub>, TMS):  $\delta$  7.77 (1H, d,  $J$  = 8.4 Hz), 7.47 (2H, dd,  $J_1$  = 6.0 Hz,  $J_2$  = 2.0 Hz), 7.42 (1H, d,  $J$  = 2.0 Hz), 7.34-7.29 (4H, m), 6.92 (1H, s), 2.14 (3H, s);

$^{13}\text{C}$  NMR ( $\text{CDCl}_3$ , 100 MHz):  $\delta$  169.3, 135.3, 134.1, 133.2, 131.9, 130.4, 129.6, 129.0, 128.3, 127.4, 121.7, 87.6, 84.0, 62.7, 20.8; MS (%)  $m/e$  318 (65), 276 (66), 259 (79), 247 (30), 241 (100), 223 (55), 212 (36), 189 (50); HRMS (EI) for  $\text{C}_{17}\text{H}_{12}\text{O}_2\text{Cl}_2$ : 318.0214; Found: 318.0218.

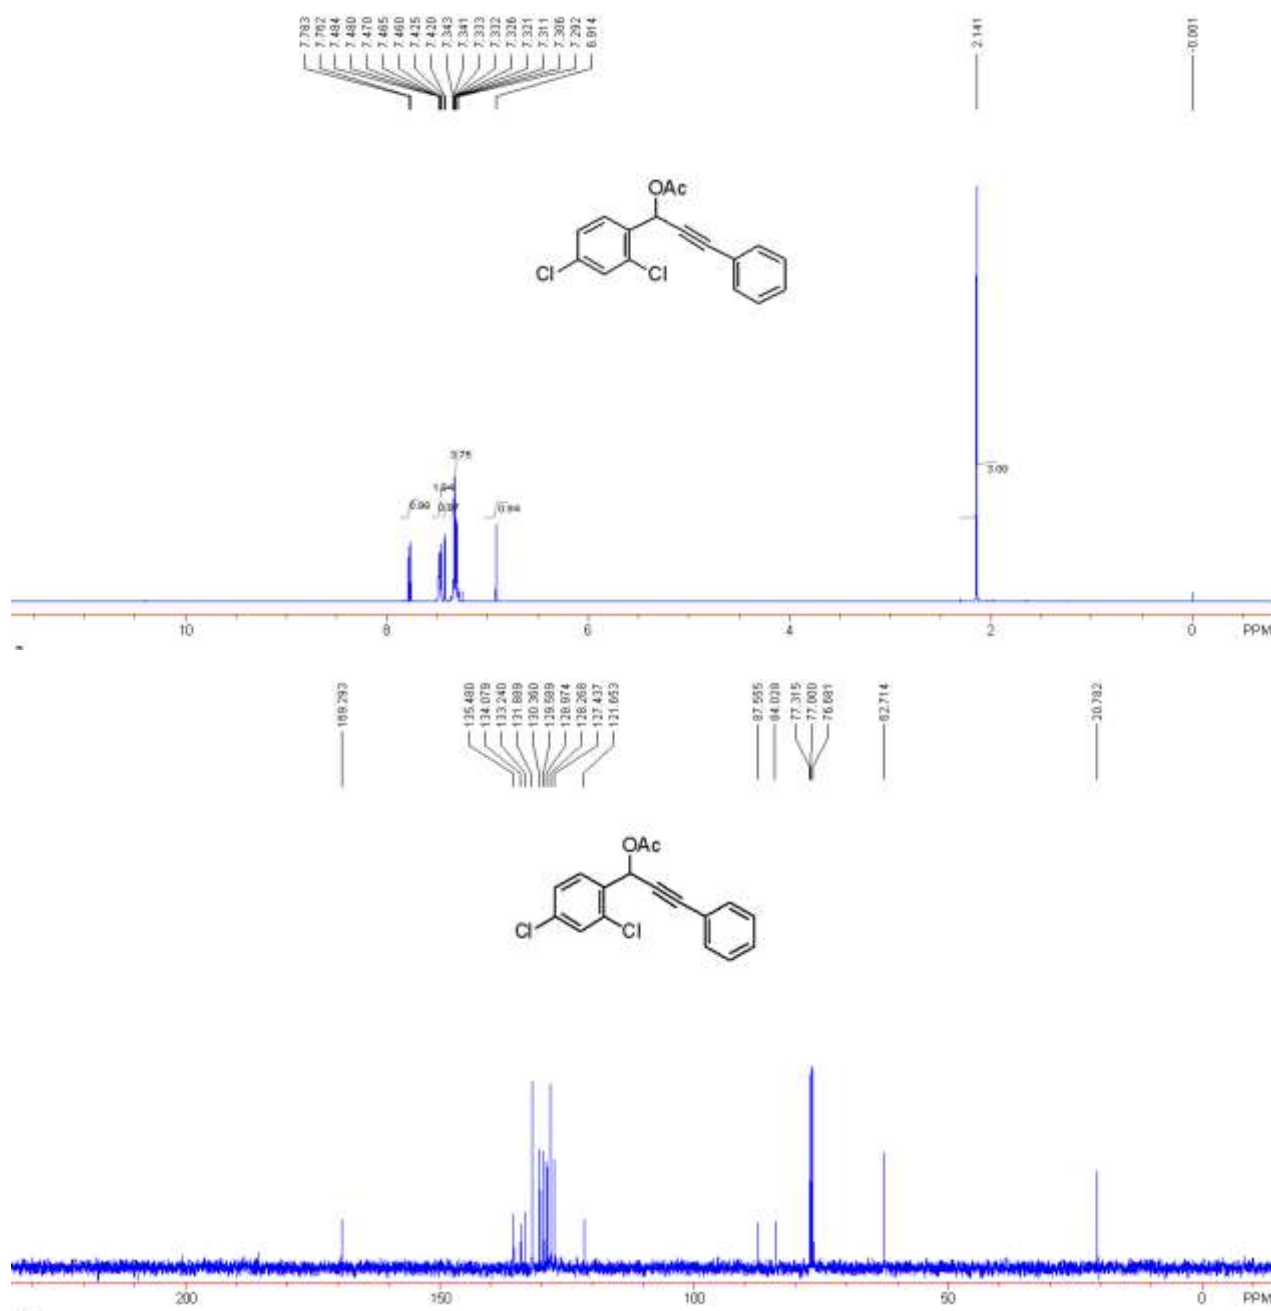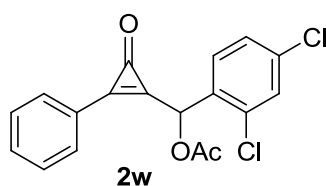

**(2,4-dichlorophenyl)(3-oxo-2-phenylcycloprop-1-enyl)methyl acetate 2w:** Following the general procedure, the mixture was purified by column chromatography using silica gel to give the target

product **2w** (58% yield). A yellow solid. m.p. for **2w** = 85-86 °C; IR (CH<sub>2</sub>Cl<sub>2</sub>):  $\nu$  2962, 1854, 1746, 1637, 1588, 1473, 1448, 1370, 1259, 1212, 1089, 1020, 866 cm<sup>-1</sup>; <sup>1</sup>H NMR (400 MHz, CDCl<sub>3</sub>, TMS):  $\delta$  7.77 (2H, d,  $J$  = 8.4 Hz), 7.61-7.58 (1H, m), 7.54-7.48 (4H, m), 7.33 (1H, dd,  $J_1$  = 8.4 Hz,  $J_2$  = 2.0 Hz), 7.15 (1H, s), 2.25 (3H, s); <sup>13</sup>C NMR (CDCl<sub>3</sub>, 100 MHz):  $\delta$  169.3, 154.4, 153.5, 149.2, 136.3, 134.0, 133.4, 131.9, 130.6, 130.2, 129.4, 128.0, 122.6, 68.2, 20.7; MS (ESI)  $m/e$  347.0 (M<sup>+</sup>+H); HRMS (ESI) for C<sub>18</sub>H<sub>12</sub>O<sub>3</sub>Cl<sub>2</sub> (M<sup>+</sup>): 346.0163, Found: 346.0169.

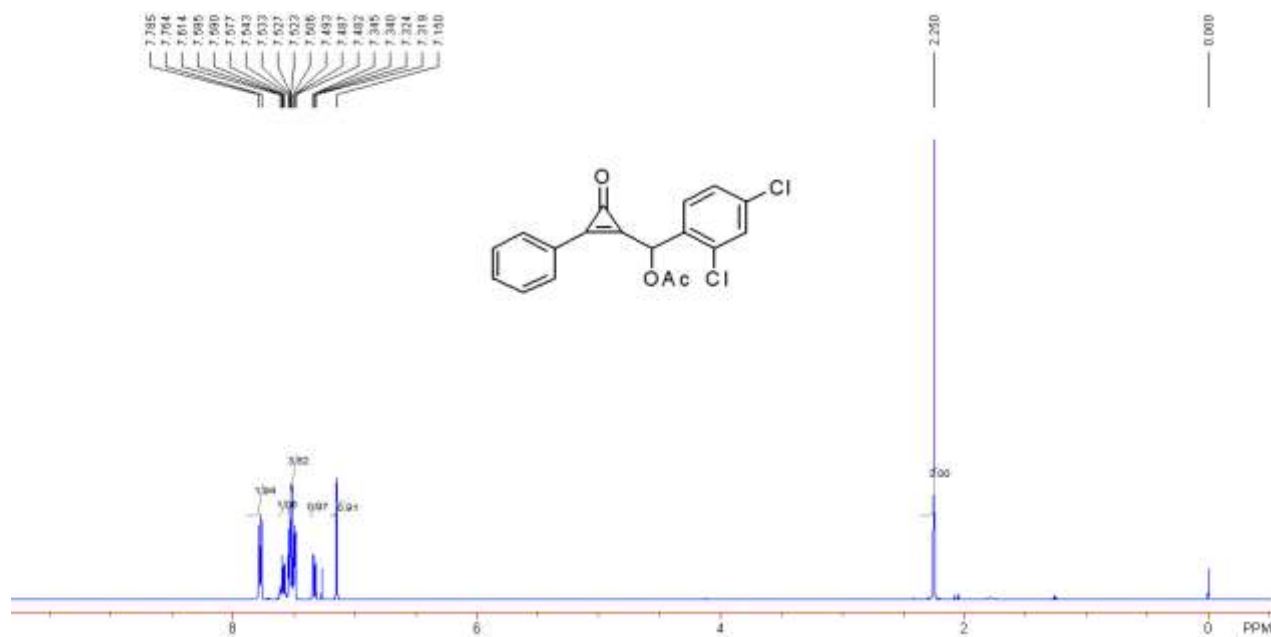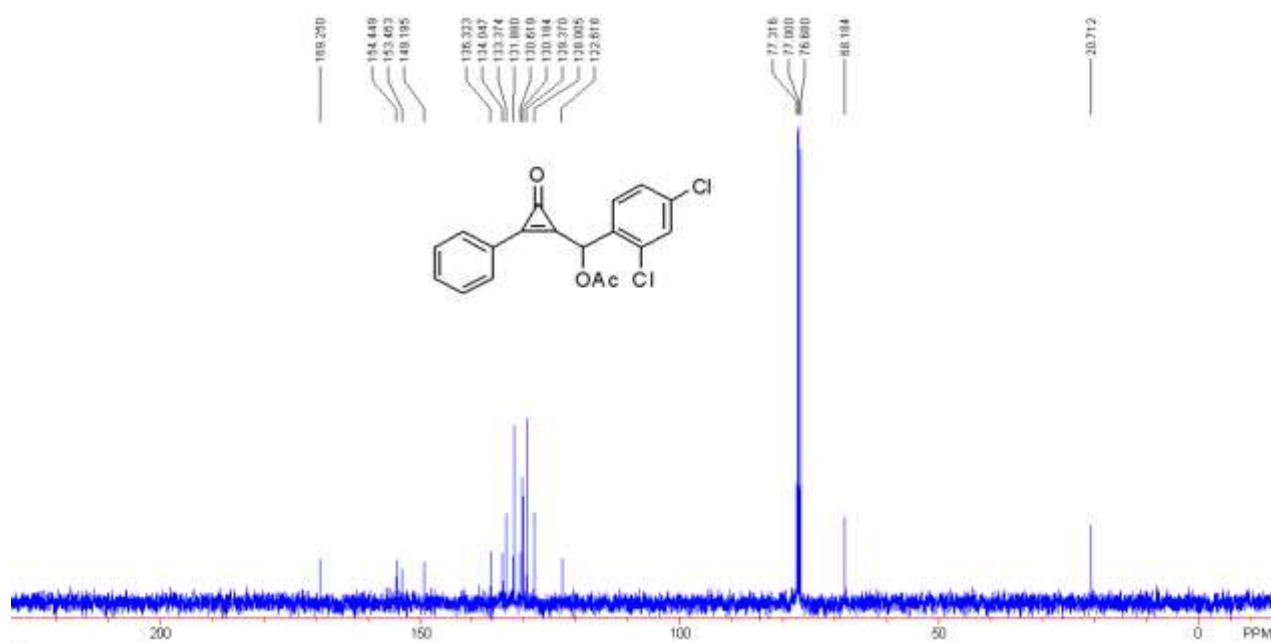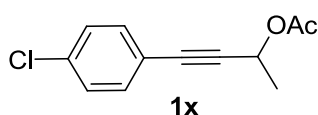

**4-(4-chlorophenyl)but-3-yn-2-yl acetate 1x:** Following the general procedure, the mixture was purified by column chromatography using silica gel to give the target product **1x** (87% yield). A yellow oil. IR (CH<sub>2</sub>Cl<sub>2</sub>):  $\nu$  2962, 1743, 1488, 1448, 1370, 1339, 1259, 1225, 1083, 1030, 1014, 952 cm<sup>-1</sup>; <sup>1</sup>H NMR (400 MHz, CDCl<sub>3</sub>, TMS):  $\delta$  7.37 (2H, d,  $J$  = 8.4 Hz), 7.28 (2H, d,  $J$  = 8.4 Hz), 5.66 (1H, q,  $J$  = 2.8 Hz), 2.11 (3H, s), 1.58 (3H, d,  $J$  = 6.4 Hz); <sup>13</sup>C NMR (CDCl<sub>3</sub>, 100 MHz):  $\delta$  169.9, 134.6, 133.1, 128.6, 120.7, 88.3, 83.4, 60.7, 21.4, 21.1; MS (%)  $m/e$  222 (18), 207 (45), 180 (45), 162 (100), 145 (63), 136 (19), 127 (91), 115 (24), 101 (24); HRMS (EI) for C<sub>12</sub>H<sub>11</sub>O<sub>2</sub>Cl: 222.0448; Found: 222.0447.

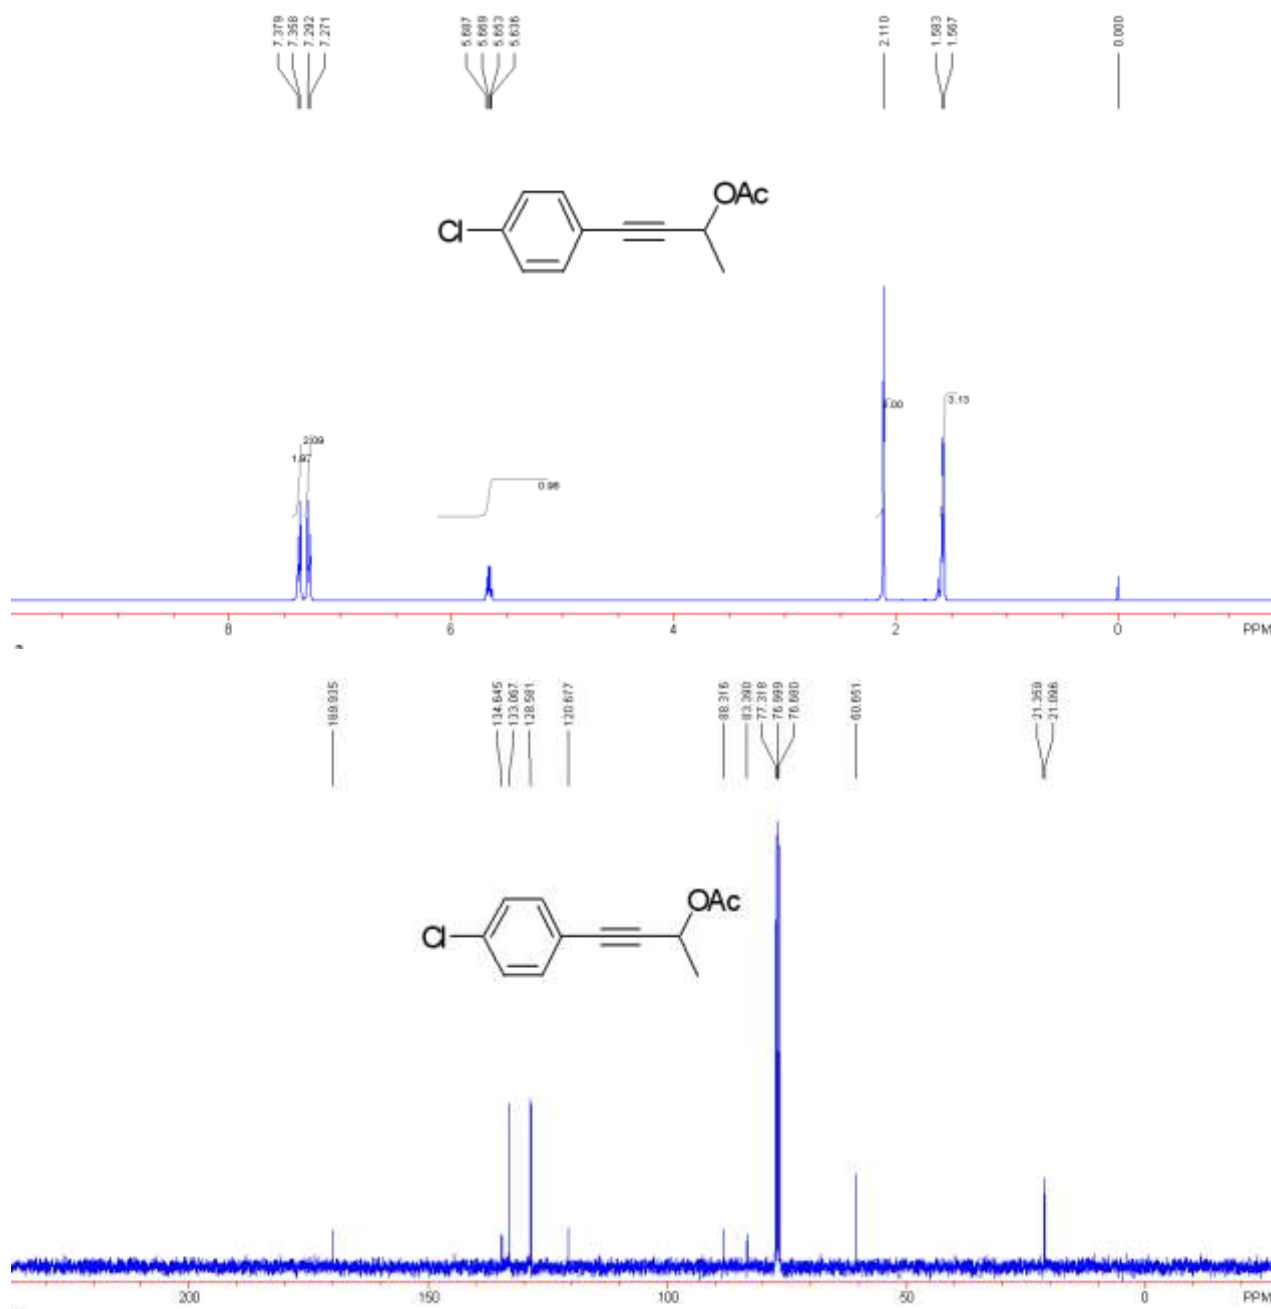



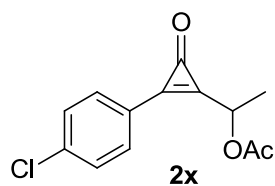

**1-(2-(4-chlorophenyl)-3-oxocycloprop-1-enyl)ethyl acetate 2x:** Following the general procedure, the mixture was purified by column chromatography using silica gel to give the target product **2x** (53% yield). A yellow solid. m.p. for **2x** = 50-52 °C; IR (CH<sub>2</sub>Cl<sub>2</sub>):  $\nu$  2936, 1850, 1741, 1639, 1589, 1485, 1444, 1402, 1371, 1222, 1033, 1014, 948 cm<sup>-1</sup>; <sup>1</sup>H NMR (400 MHz, CDCl<sub>3</sub>, TMS):  $\delta$  7.77 (2H, dd,  $J_1$  = 8.8 Hz,  $J_2$  = 2.0 Hz), 7.52 (2H, dd,  $J_1$  = 8.8 Hz,  $J_2$  = 2.0 Hz), 5.97 (1H, q,  $J$  = 6.8 Hz), 2.21 (3H, s), 1.66 (3H, d,  $J$  = 7.2 Hz); <sup>13</sup>C NMR (CDCl<sub>3</sub>, 100 MHz):  $\delta$  169.6, 153.6, 153.3, 151.8, 139.5, 132.9, 129.7, 121.1, 66.5, 20.9, 18.0; MS (ESI)  $m/e$  251.0 (M<sup>+</sup>+H); HRMS (ESI) for C<sub>13</sub>H<sub>11</sub>O<sub>3</sub>Cl (M<sup>+</sup>): 250.0397, Found: 250.0404.

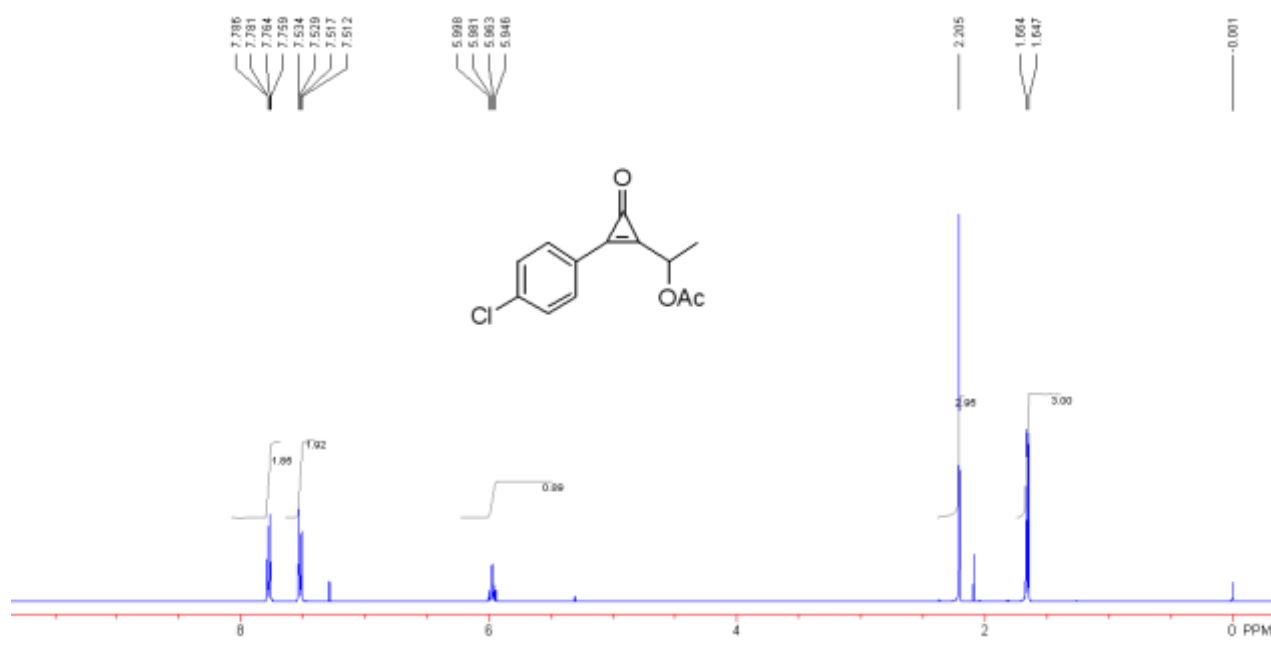

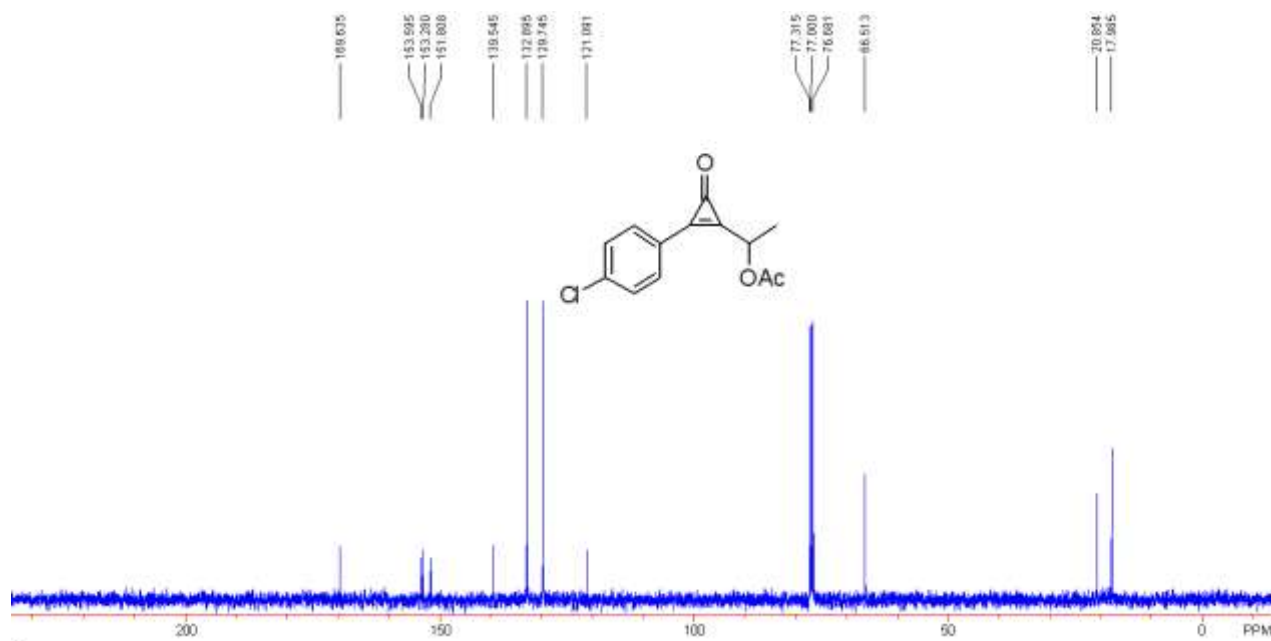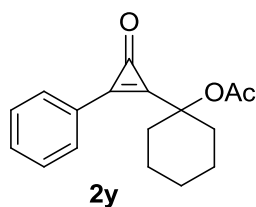

**1-(3-oxo-2-phenylcycloprop-1-en-1-yl)cyclohexyl acetate **2y**:** Following the general procedure, the mixture was purified by column chromatography using silica gel to give the target product **2y** (80% yield). A yellow solid. m.p. for **2y** = 83-85 °C; IR (CH<sub>2</sub>Cl<sub>2</sub>):  $\nu$  2939, 2862, 1854, 1739, 1633, 1489, 1448, 1369, 1259, 1228, 1089, 1013, 970, 929, 796, 770, 734 cm<sup>-1</sup>; <sup>1</sup>H NMR (400 MHz, CDCl<sub>3</sub>, TMS):  $\delta$  7.76 (2H, dd,  $J_1$  = 8.0 Hz,  $J_2$  = 1.6 Hz), 7.56-7.49 (3H, m), 2.28-2.21 (2H, m), 2.12-2.06 (5H, m), 1.77-1.53 (6H, m); <sup>13</sup>C NMR (CDCl<sub>3</sub>, 100 MHz):  $\delta$  169.2, 155.7, 154.4, 150.6, 132.6, 131.6, 129.3, 123.1, 79.3, 34.2, 25.0, 21.9, 21.1; MS (ESI)  $m/e$  271.1 (M<sup>+</sup>+H); HRMS (ESI) for C<sub>17</sub>H<sub>18</sub>O<sub>3</sub> (M<sup>+</sup>): 270.1256, Found: 270.1251.

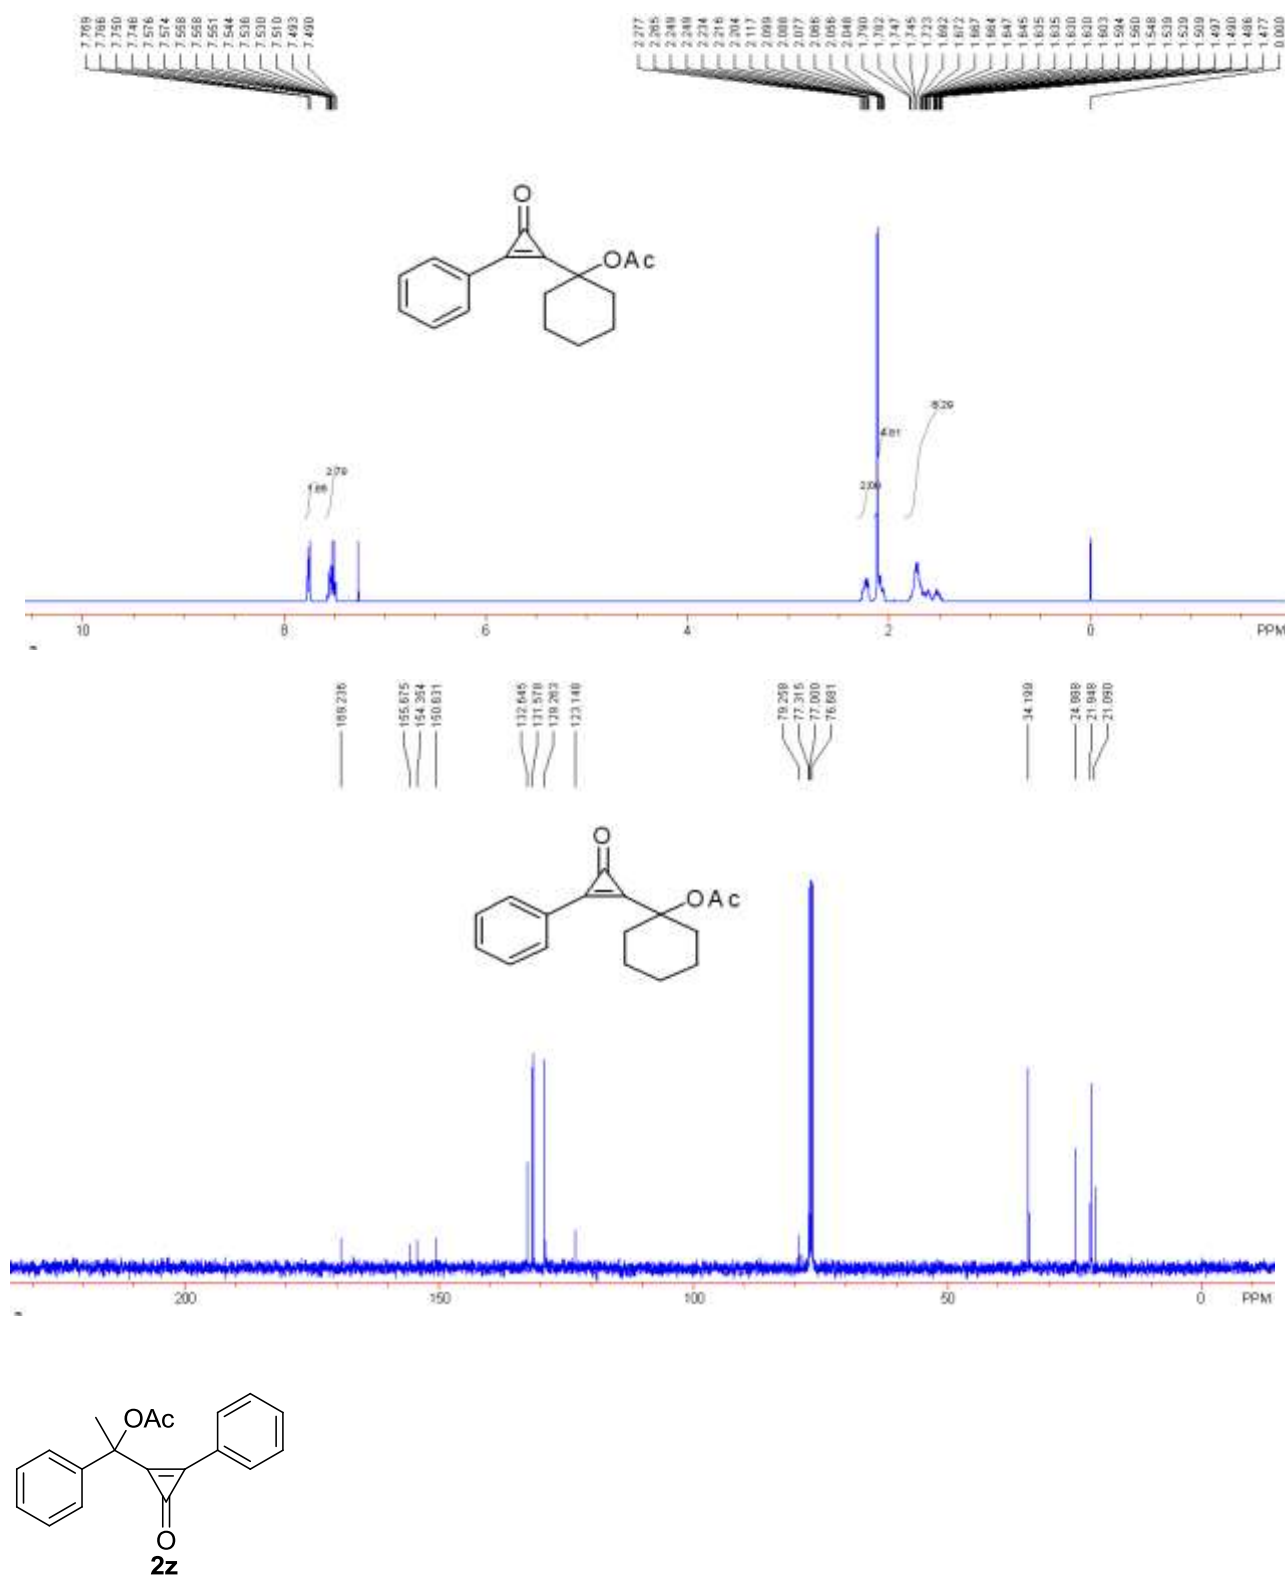

**1-(3-oxo-2-phenylcycloprop-1-enyl)-1-phenylethyl acetate **2z**:** Following the general procedure, the mixture was purified by column chromatography using silica gel to give the target product **2z** (45% yield). A yellow oil; IR (CH<sub>2</sub>Cl<sub>2</sub>): ν 2962, 2849, 1857, 1742, 1635, 1490, 1447, 1403, 1369, 1261, 1225, 1093, 1012, 940, 799, 769 cm<sup>-1</sup>; <sup>1</sup>H NMR (400 MHz, CDCl<sub>3</sub>, TMS): δ 7.80 (2H, d, *J* = 8.4 Hz), 7.60 (2H, d, *J* = 8.4 Hz), 7.57-7.51 (3H, m), 7.40 (2H, d, *J* = 8.8 Hz), 2.15 (3H, s), 1.97 (3H,

s);  $^{13}\text{C}$  NMR ( $\text{CDCl}_3$ , 100 MHz):  $\delta$  168.6, 153.9, 152.8, 150.0, 138.8, 134.2, 133.0, 131.7, 129.3, 129.1, 126.4, 122.5, 79.7, 27.7, 20.8; MS (ESI)  $m/e$  239.1 (M-OAc-CO); HRMS (ESI) for  $\text{C}_{16}\text{H}_{12}\text{Cl}$  (M-OAc-CO): 239.0622, Found: 239.0626.

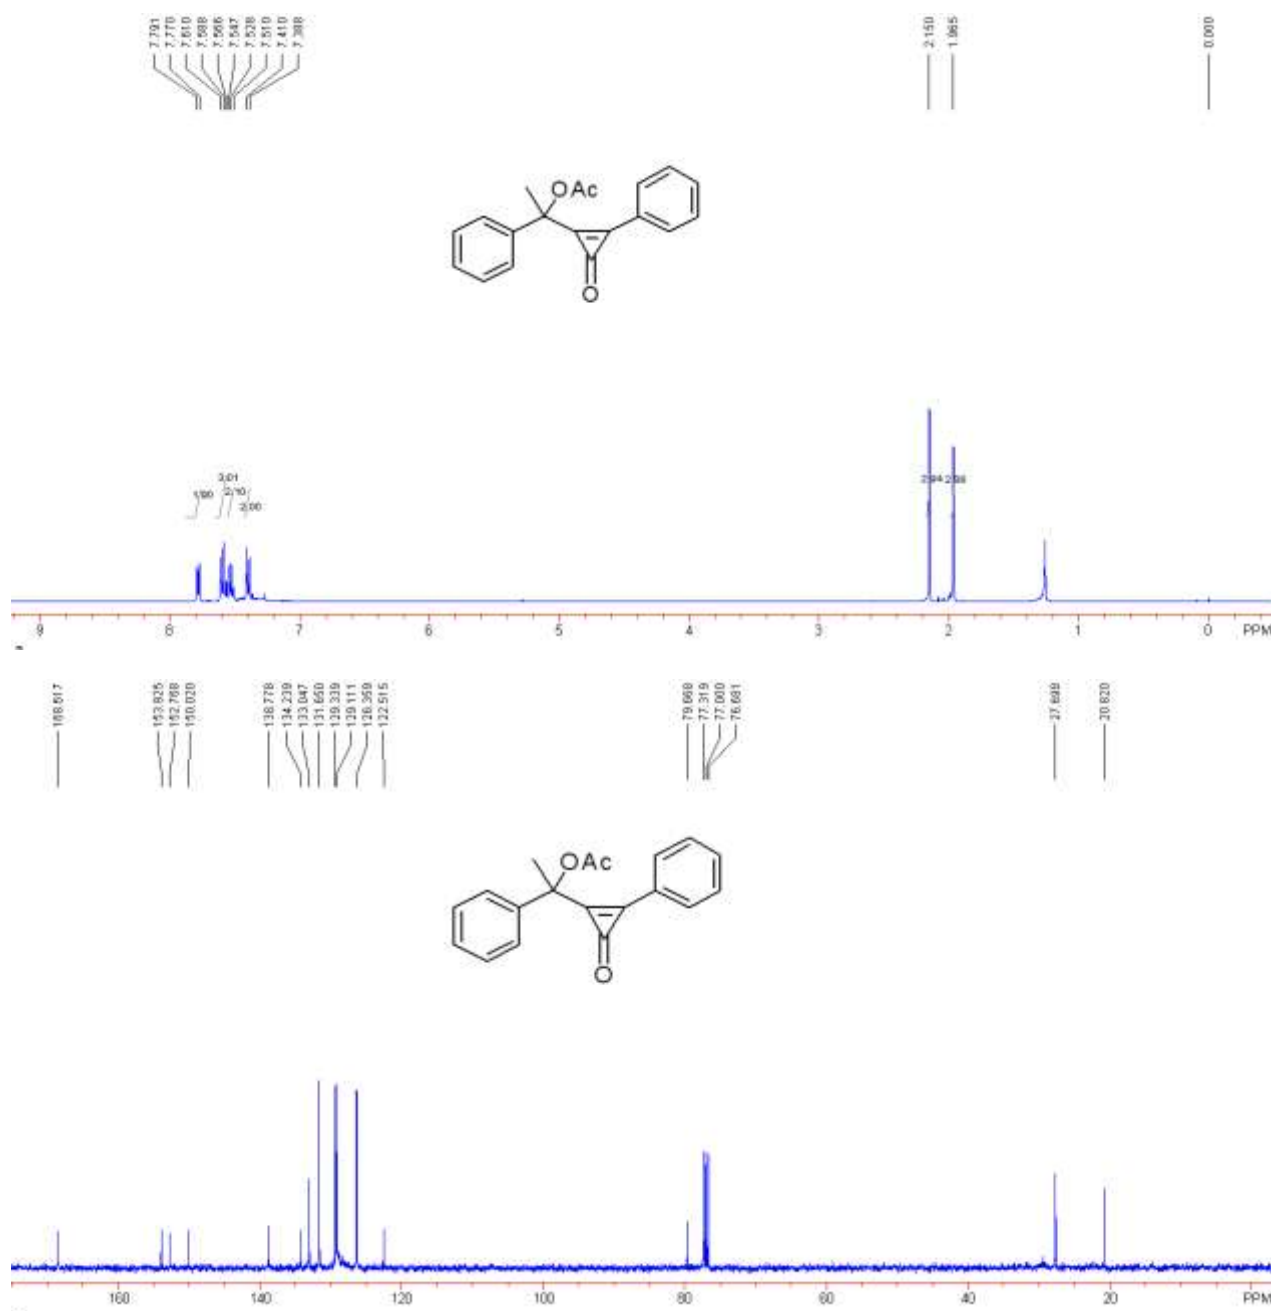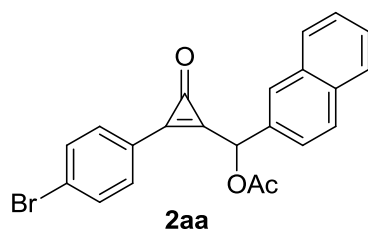

(2-(4-bromophenyl)-3-oxocycloprop-1-enyl)(naphthalen-2-yl)methyl acetate **2aa**: Following the

general procedure, the mixture was purified by column chromatography using silica gel to give the target product **2aa** (38% yield). A yellow solid. m.p. for **2aa** = 165-168 °C; IR (CH<sub>2</sub>Cl<sub>2</sub>):  $\nu$  3062, 1850, 1736, 1637, 1583, 1478, 1397, 1366, 1215, 1207, 1103, 1016, 948, 829 cm<sup>-1</sup>; <sup>1</sup>H NMR (400 MHz, CDCl<sub>3</sub>, TMS):  $\delta$  7.96 (1H, s), 7.91 (1H, d, *J* = 8.4 Hz), 7.88-7.85 (2H, m), 7.64-7.59 (4H, m), 7.56-7.53 (3H, m), 7.05 (1H, s), 2.26 (3H, s); <sup>13</sup>C NMR (CDCl<sub>3</sub>, 100 MHz):  $\delta$  169.6, 153.4, 152.7, 151.7, 133.6, 133.0, 132.8, 131.2, 129.5, 128.4, 128.2, 127.8, 127.4, 127.2, 126.9, 124.3, 121.5, 71.9, 21.0; MS (ESI) *m/e* 429.9 (M<sup>+</sup>+Na); HRMS (ESI) for C<sub>22</sub>H<sub>15</sub>O<sub>3</sub>BrNa (M<sup>+</sup>+Na): 429.0107, Found: 429.0097.

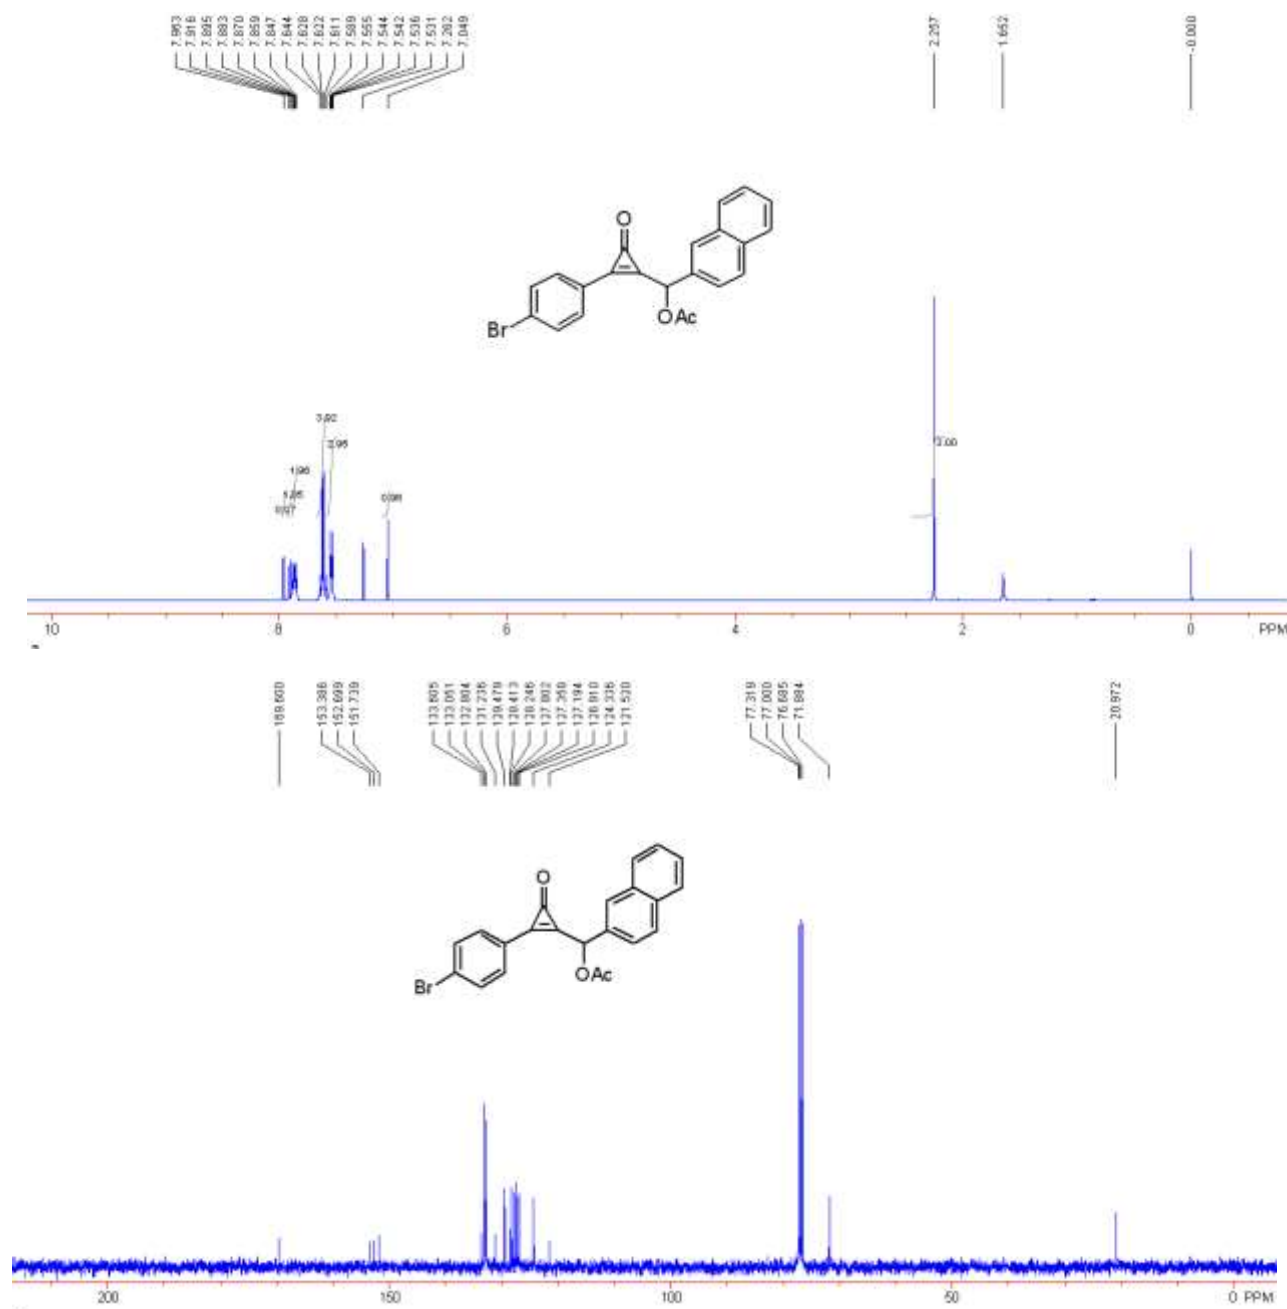

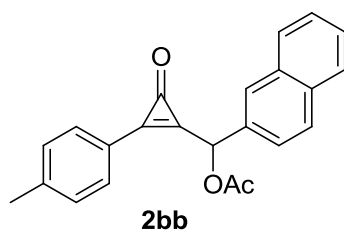

**naphthalen-2-yl(3-oxo-2-p-tolylcycloprop-1-enyl)methyl acetate 2bb:** Following the general procedure, the mixture was purified by column chromatography using silica gel to give the target product **2bb** (39% yield). A yellow solid. m.p. for **2bb** = 180-182 °C; IR (CH<sub>2</sub>Cl<sub>2</sub>):  $\nu$  3060, 1850, 1789, 1735, 1631, 1504, 1426, 1366, 1306, 1219, 1207, 1172, 1123, 970, 827 cm<sup>-1</sup>; <sup>1</sup>H NMR (400 MHz, CDCl<sub>3</sub>, TMS):  $\delta$  7.97 (1H, s), 7.90-7.83 (3H, m), 7.66 (2H, d,  $J$  = 8.0 Hz), 7.58-7.51 (3H, m), 7.28 (2H, d,  $J$  = 8.0 Hz), 7.06 (1H, s), 2.41 (3H, s), 2.26 (3H, s); <sup>13</sup>C NMR (CDCl<sub>3</sub>, 100 MHz):  $\delta$  169.7, 153.8, 153.4, 149.3, 144.3, 133.5, 133.0, 131.9, 131.5, 130.0, 129.3, 128.2, 127.7, 127.3, 127.0, 126.8, 124.5, 120.1, 71.9, 21.9, 21.0; MS (%) m/e 342 (25), 300 (100), 281 (4), 253 (6), 239 (12), 228 (10), 207 (2), 43 (11); HRMS (EI) for C<sub>23</sub>H<sub>18</sub>O<sub>3</sub>: 342.1256; Found: 342.1258.

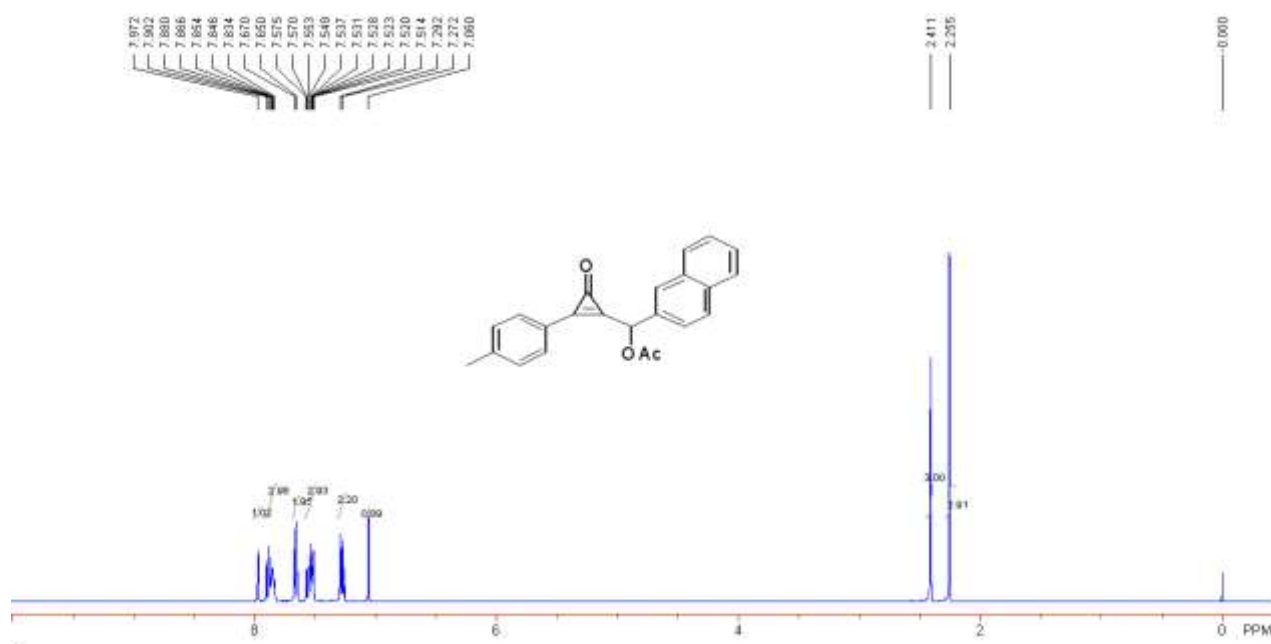

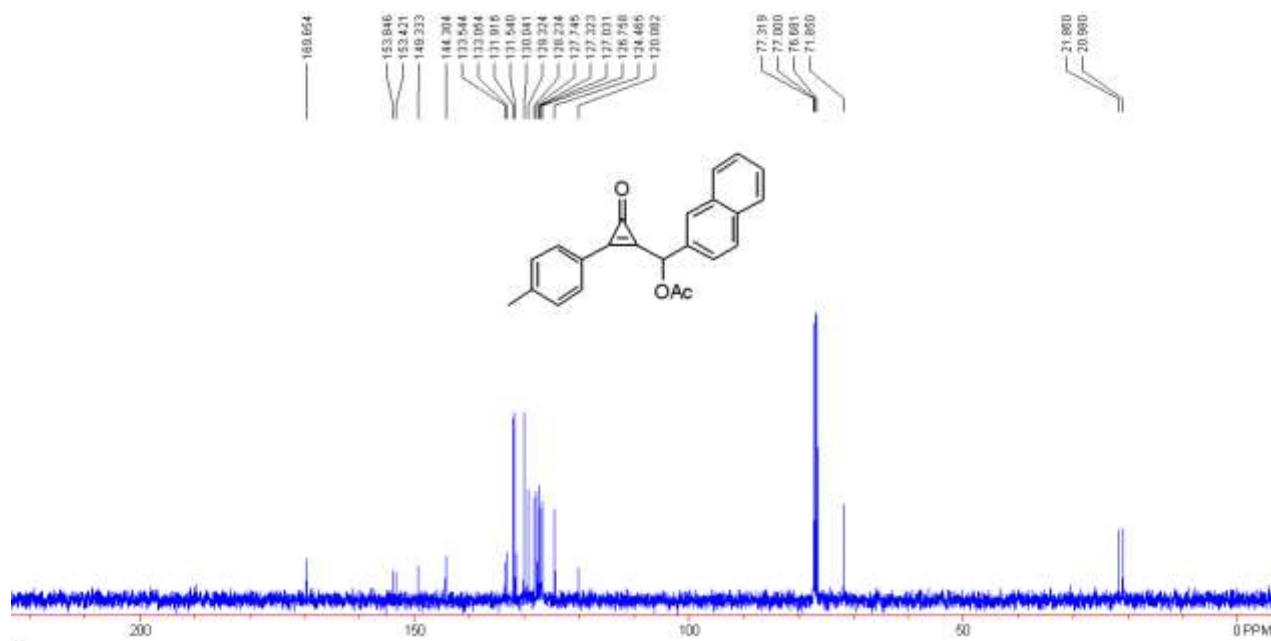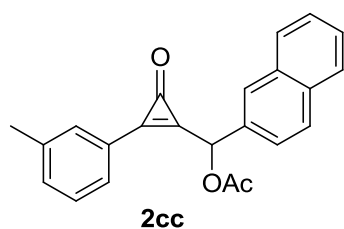

**naphthalen-2-yl(3-oxo-2-m-tolylcycloprop-1-enyl)methyl acetate **2cc**:** Following the general procedure, the mixture was purified by column chromatography using silica gel to give the target product **2cc** (30% yield). A yellow solid. m.p. for **2cc** = 126-128 °C; IR (CH<sub>2</sub>Cl<sub>2</sub>):  $\nu$  3025, 1848, 1736, 1636, 1599, 1365, 1218, 1207, 1195, 1016, 971, 867 cm<sup>-1</sup>; <sup>1</sup>H NMR (400 MHz, CDCl<sub>3</sub>, TMS):  $\delta$  7.98 (1H, s), 7.91-7.84 (3H, m), 7.58-7.51 (5H, m), 7.37-7.36 (2H, m), 7.06 (1H, s), 2.33 (3H, s), 2.27 (3H, s); <sup>13</sup>C NMR (CDCl<sub>3</sub>, 100 MHz):  $\delta$  169.6, 154.0, 153.9, 150.8, 139.2, 134.0, 133.6, 133.1, 132.6, 131.6, 129.4, 129.2, 128.9, 128.2, 127.8, 127.3, 127.1, 126.8, 124.5, 122.6, 71.9, 21.1, 21.0; MS (ESI)  $m/e$  685.1 (2M<sup>+</sup>+H); HRMS (ESI) for C<sub>23</sub>H<sub>18</sub>O<sub>3</sub>Na (M<sup>+</sup>+Na): 365.1150, Found: 365.1148.

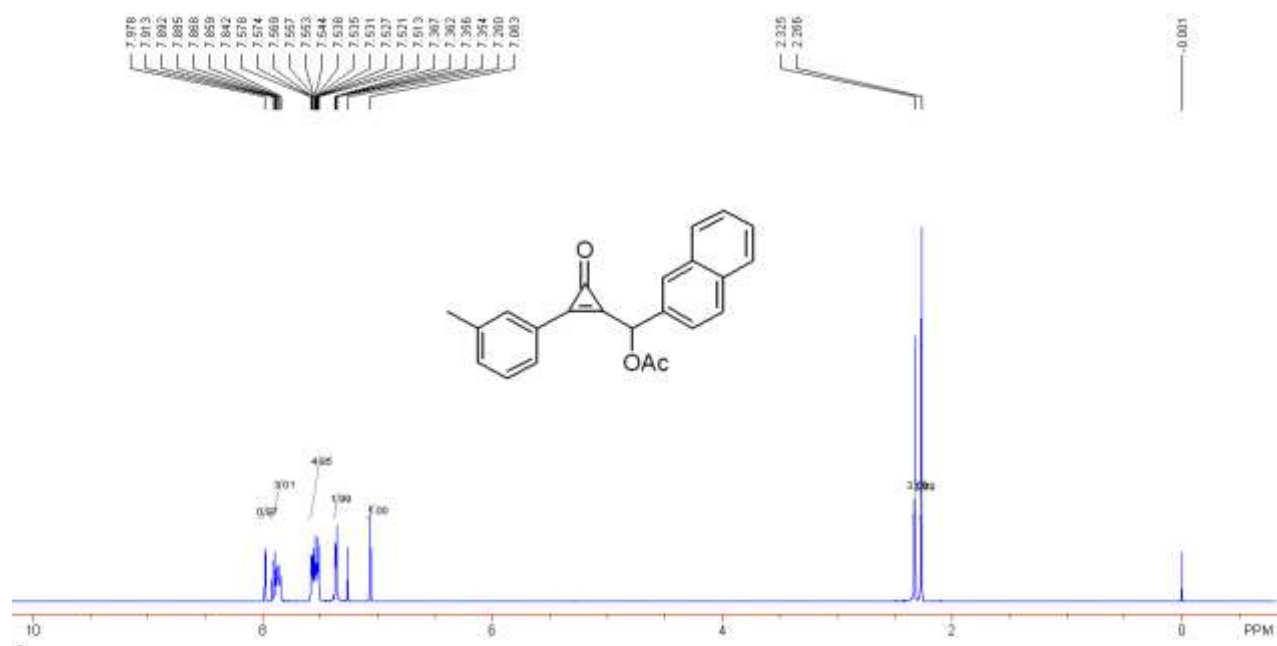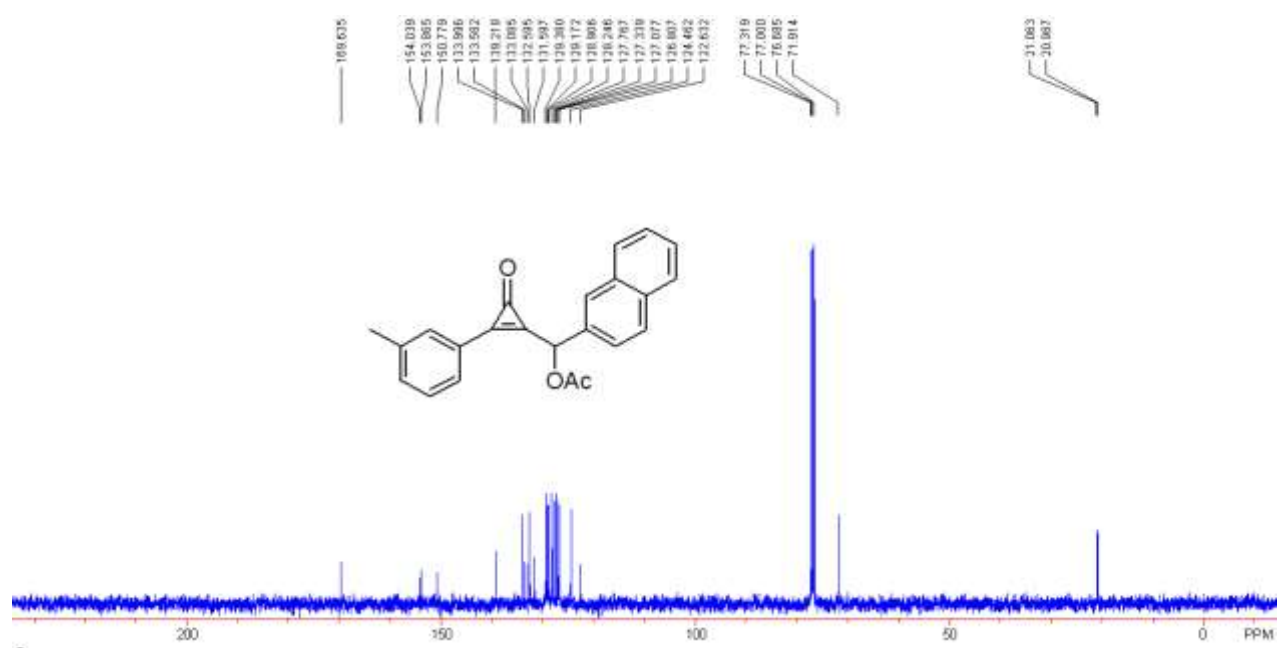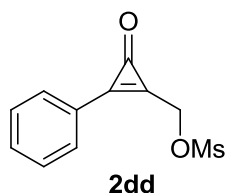

(3-oxo-2-phenylcycloprop-1-enyl)methyl methanesulfonate **2ab**: Following the general procedure, the mixture was purified by column chromatography using silica gel to give the target product **2ab** (59% yield). A white solid. m.p. for **2ab** = 122-124 °C; IR (CH<sub>2</sub>Cl<sub>2</sub>): ν 2961, 2922, 1861, 1841, 1630, 1449, 1356, 1260, 1167, 1094, 982, 893 cm<sup>-1</sup>; <sup>1</sup>H NMR (400 MHz, CDCl<sub>3</sub>, TMS): δ 7.88 (2H, d, *J* =



7.2 Hz), 7.62 (1H, t,  $J = 7.2$  Hz), 7.58-7.54 (2H, m), 5.46 (2H, s), 3.22 (3H, s);  $^{13}\text{C}$  NMR ( $\text{CDCl}_3$ , 100 MHz):  $\delta$  154.4, 153.0, 147.3, 133.6, 132.1, 129.4, 122.2, 63.9, 38.0; MS (ESI)  $m/e$  239.0 ( $\text{M}^+ + \text{H}$ ); HRMS (ESI) for  $\text{C}_{11}\text{H}_{11}\text{O}_4\text{S}$  ( $\text{M}^+ + \text{H}$ ): 239.0373, Found: 239.0378.

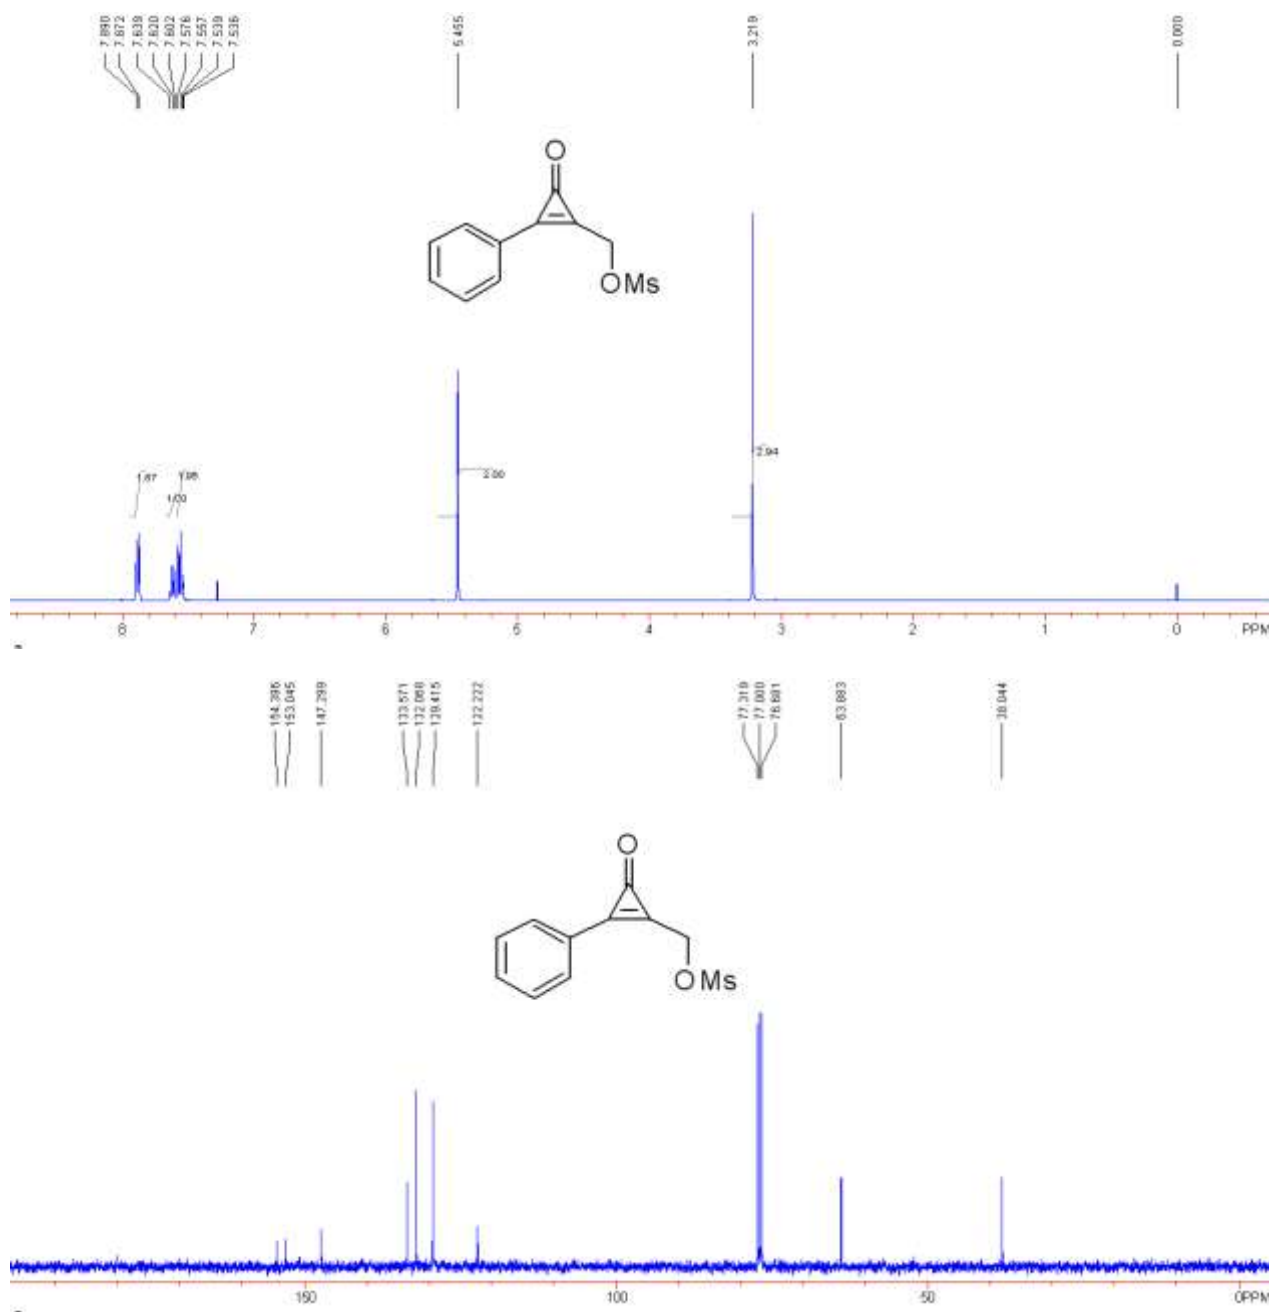

## Reference:

- [1] Wang, F.; Luo, T.; Hu, J. B.; Wang, Y.; Krishnan, H. S.; Jog, P. V.; Ganesh, S. K.; Prakash, G. K. S. Olah, G. A. *Angew. Chem., Int. Ed.* **2011**, *50*, 7153-7157.
- [2] Cheng, Z.-L.; Chen, Q.-Y. *Chin. J. Chem.* **2006**, *24*, 1219-1224.
- [3] Peng, C.; Wang, Y.; Wang, J. D. *J. Am. Chem. Soc.* **2008**, *130*, 1566-1567.

- [4] Nishikado, H.; Nakatsuji, H.; Ueno, K.; Nagase, R.; Tanabe, Y. *Synlett* **2010**, 2087-2092.
- [5] Poeylaunt-Palena, A. A.; Testero, S. A.; Mata, E. G. *Chem. Commun.* **2011**, 47, 1565-1467.

## General Procedure for the Preparation of 3 from the Reaction of 2a with MeOH Using 3a as an Example in the Presence of DABCO

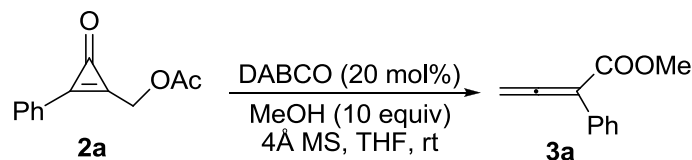

To a mixture of **2a** (0.20 mmol, 46 mg), MeOH (10.0 mmol), DABCO (0.04 mmol, 5.0 mg) and 50 mg 4Å MS was added 2.0 mL of THF at room temperature (25 °C) under argon. The reaction solution was monitored by TLC. After the reaction was completed, the solution was concentrated under reduced pressure and the residue was further purified by silica gel column chromatography (EtOAc/PE = 1/16) to give the target product **3a**.

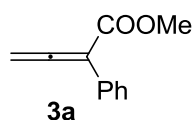

**methyl 2-phenylbuta-2,3-dienoate 3a:** Following the general procedure, the mixture was purified by column chromatography using silica gel to give the target product **3a** (33 mg, 95% yield). A yellow oil. This is a known compound.<sup>[2]</sup> <sup>1</sup>H NMR (400 MHz, CDCl<sub>3</sub>, TMS): δ 7.50 (2H, d, *J* = 7.2 Hz), 7.37-7.33 (2H, m), 7.29 (1H, d, *J* = 7.2 Hz), 5.42 (2H, s), 3.83 (3H, s); <sup>13</sup>C NMR (CDCl<sub>3</sub>, 100 MHz): δ 215.6, 166.4, 131.9, 128.4, 128.3, 127.7, 102.8, 80.1, 52.4.

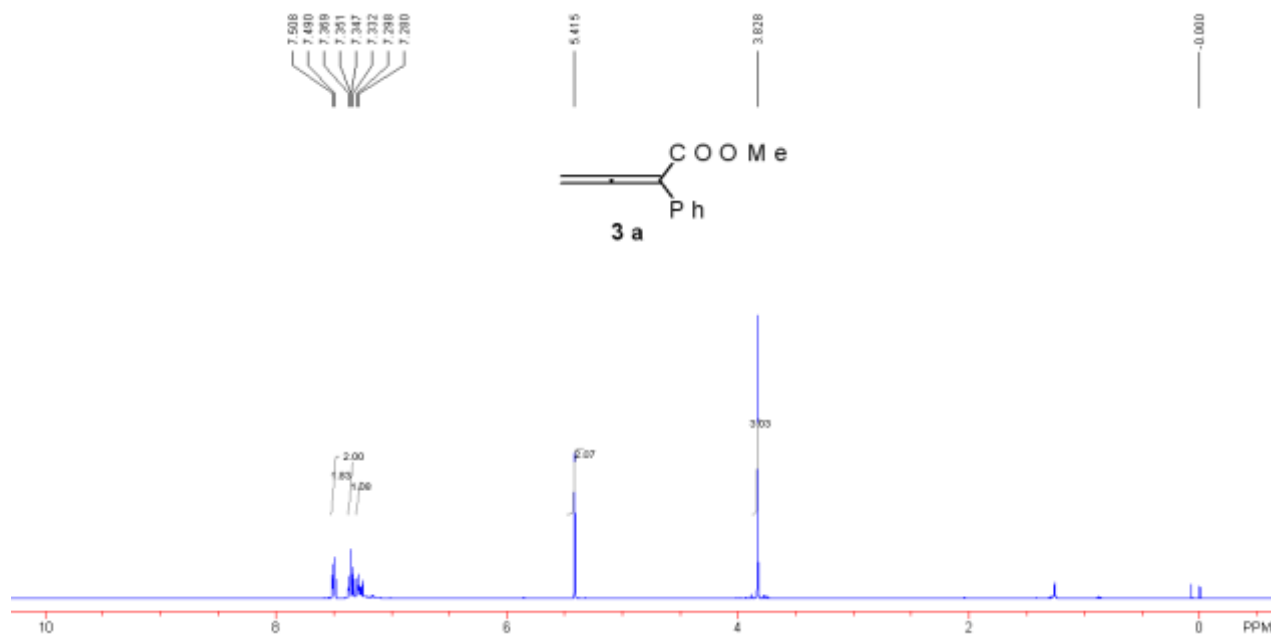

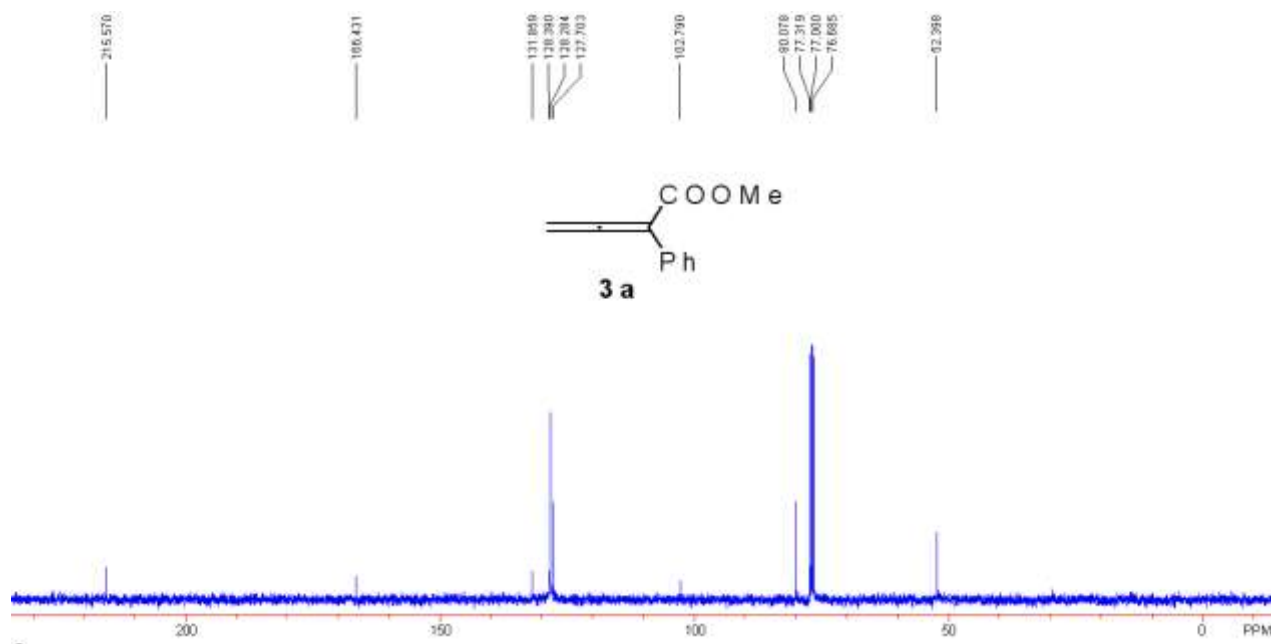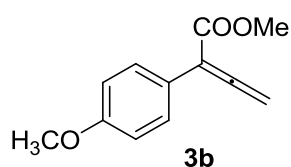

**methyl 2-(4-methoxyphenyl)buta-2,3-dienoate 3b**: Following the general procedure, the mixture was purified by column chromatography using silica gel to give the target product **3b** (38 mg, 93% yield). A white solid. m.p. for **3b** = 72-73 °C; IR (CH<sub>2</sub>Cl<sub>2</sub>):  $\nu$  2962, 1717, 1607, 1511, 1257, 1085, 1011, 859, 792 cm<sup>-1</sup>; <sup>1</sup>H NMR (400 MHz, CDCl<sub>3</sub>, TMS):  $\delta$  7.43 (2H, d,  $J$  = 8.8 Hz), 6.89 (2H, d,  $J$  = 8.8 Hz), 5.40 (2H, s), 3.83 (3H, s), 3.82 (3H, s); <sup>13</sup>C NMR (CDCl<sub>3</sub>, 100 MHz):  $\delta$  215.3, 166.7, 159.1, 129.6, 123.9, 113.7, 102.3, 80.0, 55.2, 52.4; MS (%)  $m/e$  204 (96), 189 (4), 175 (9), 145 (92), 133 (100), 102 (47), 76 (19), 63 (8); HRMS (EI) for C<sub>12</sub>H<sub>12</sub>O<sub>3</sub>: 204.0786; Found: 204.0787.

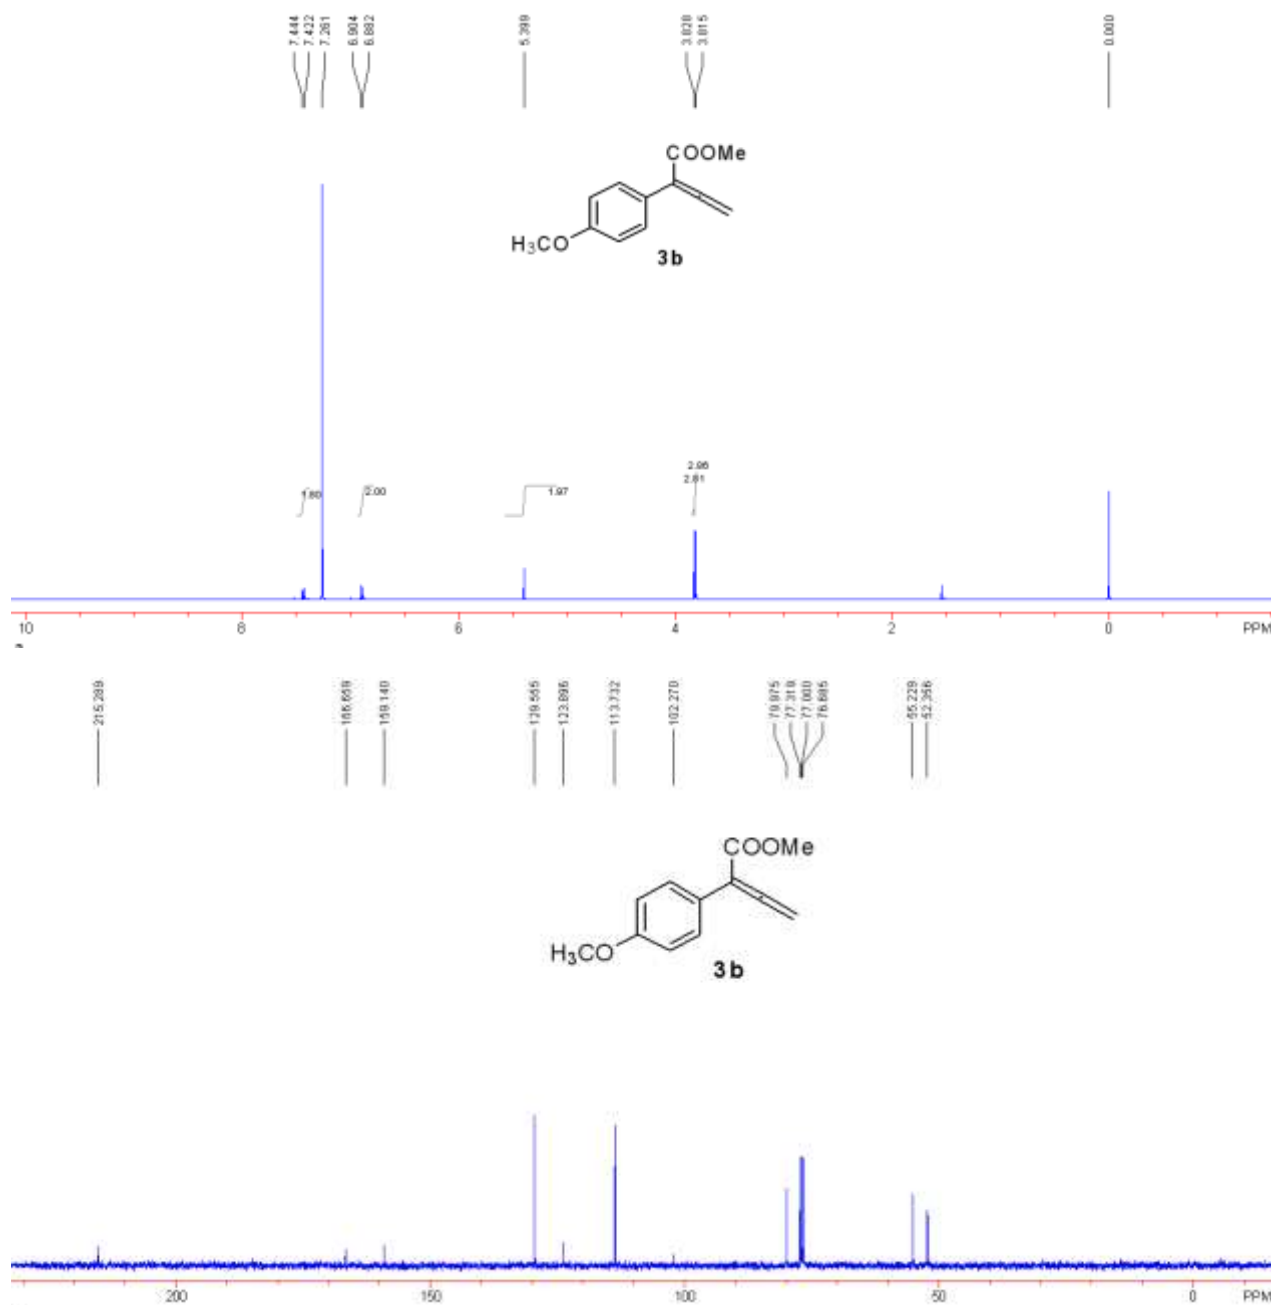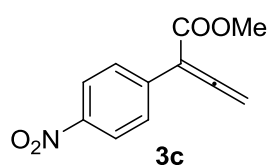

**methyl 2-(4-nitrophenyl)buta-2,3-dienoate **3c**:** Following the general procedure, the mixture was purified by column chromatography using silica gel to give the target product **3c** (41 mg, 94% yield). A yellow solid. m.p. for **3c** = 92-93 °C; IR (CH<sub>2</sub>Cl<sub>2</sub>): ν 2960, 2925, 1953, 1721, 1594, 1515, 1343, 1294, 1093, 1023, 854, 796 cm<sup>-1</sup>; <sup>1</sup>H NMR (400 MHz, CDCl<sub>3</sub>, TMS): δ 8.20 (2H, d, *J* = 8.8 Hz), 7.73 (2H, d, *J* = 8.8 Hz), 5.57 (2H, s), 3.86 (3H, s); <sup>13</sup>C NMR (CDCl<sub>3</sub>, 100 MHz): δ 216.3, 165.5, 147.0, 138.8, 129.1, 123.4, 101.6, 81.4, 52.7; MS (%) *m/e* 219 (100), 202 (10), 189 (11), 160 (22),

148 (20), 114 (60), 102 (57), 88 (30); HRMS (EI) for  $C_{11}H_9NO_4$ : 219.0532; Found: 219.0529.

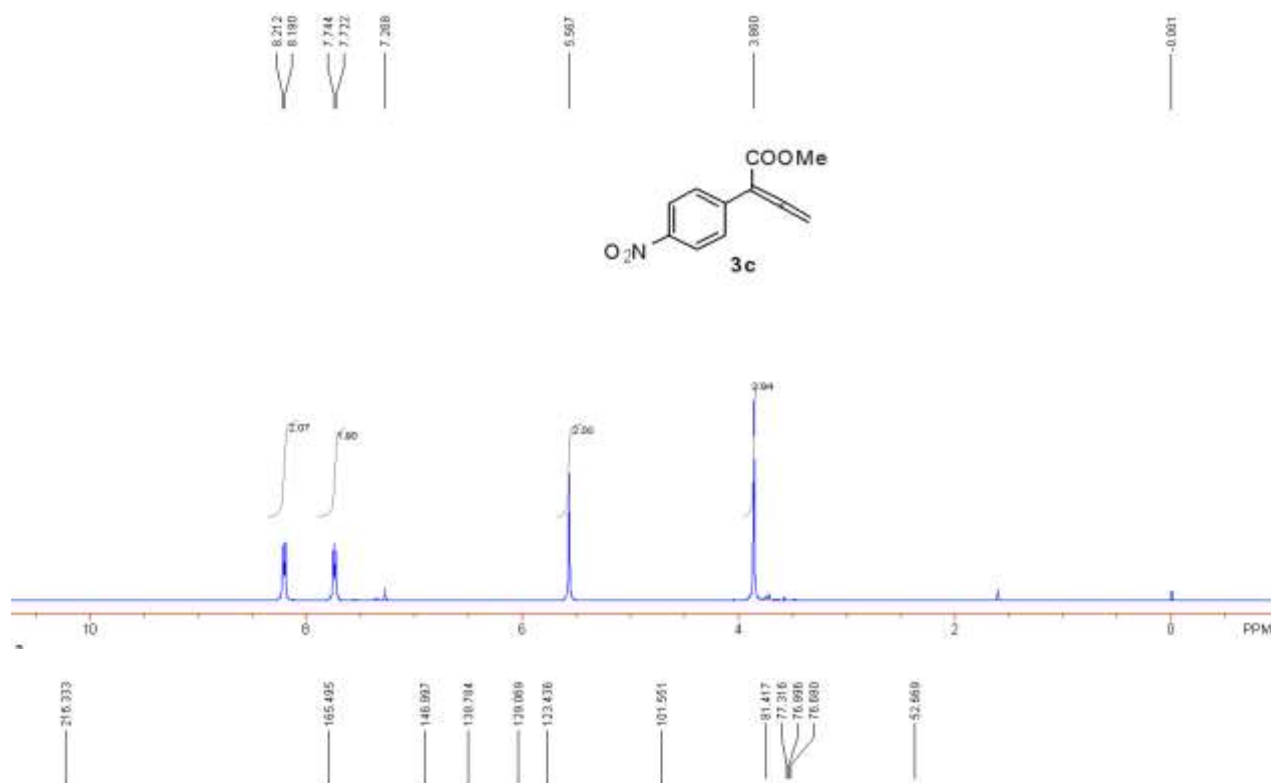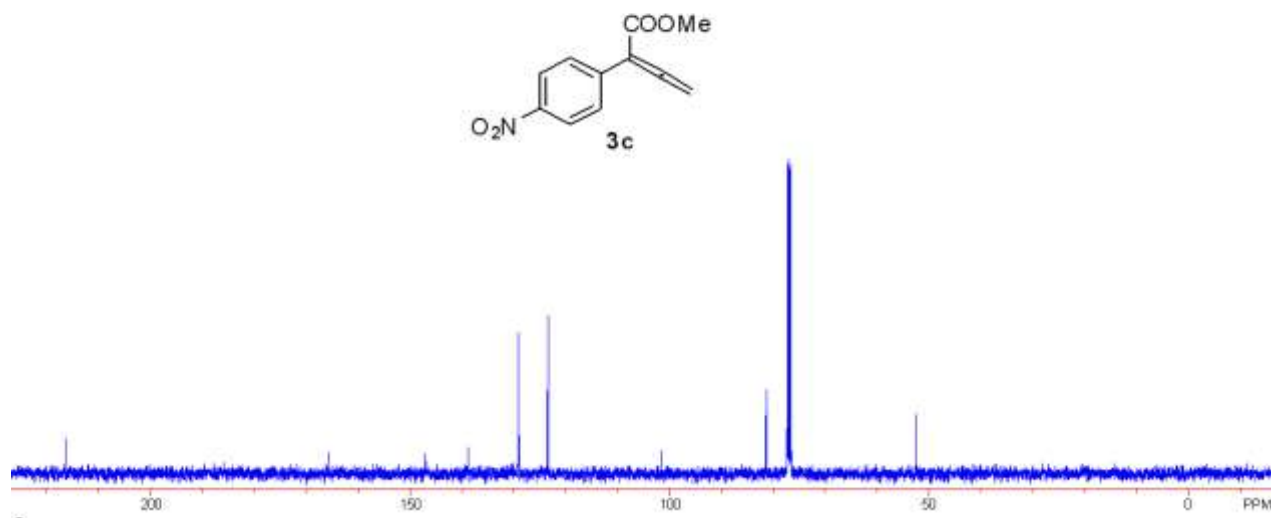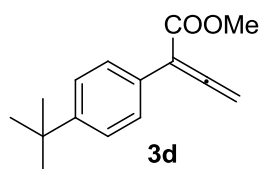

**methyl 2-(4-tert-butylphenyl)buta-2,3-dienoate 3d:** Following the general procedure, the mixture was purified by column chromatography using silica gel to give the target product **3d** (42 mg, 91% yield). A yellow oil. IR ( $CH_2Cl_2$ ):  $\nu$  2962, 2868, 1720, 1512, 1434, 1363, 1263, 1149, 1108, 1014, 906, 798  $cm^{-1}$ ;  $^1H$  NMR (400 MHz,  $CDCl_3$ , TMS):  $\delta$  7.43 (2H, d,  $J$  = 8.8 Hz), 7.38 (2H, d,  $J$  = 8.8

Hz), 5.39 (2H, s), 3.82 (3H, s), 1.32 (9H, s);  $^{13}\text{C}$  NMR ( $\text{CDCl}_3$ , 100 MHz):  $\delta$  215.5, 166.5, 150.7, 128.8, 128.0, 125.3, 102.6, 79.9, 52.4, 34.5, 31.2; MS (%)  $m/e$  230 (41), 215 (100), 183 (11), 173 (14), 155 (21), 141 (19), 128 (16), 115 (21); HRMS (EI) for  $\text{C}_{15}\text{H}_{18}\text{O}_2$ : 230.1307; Found: 230.1311.

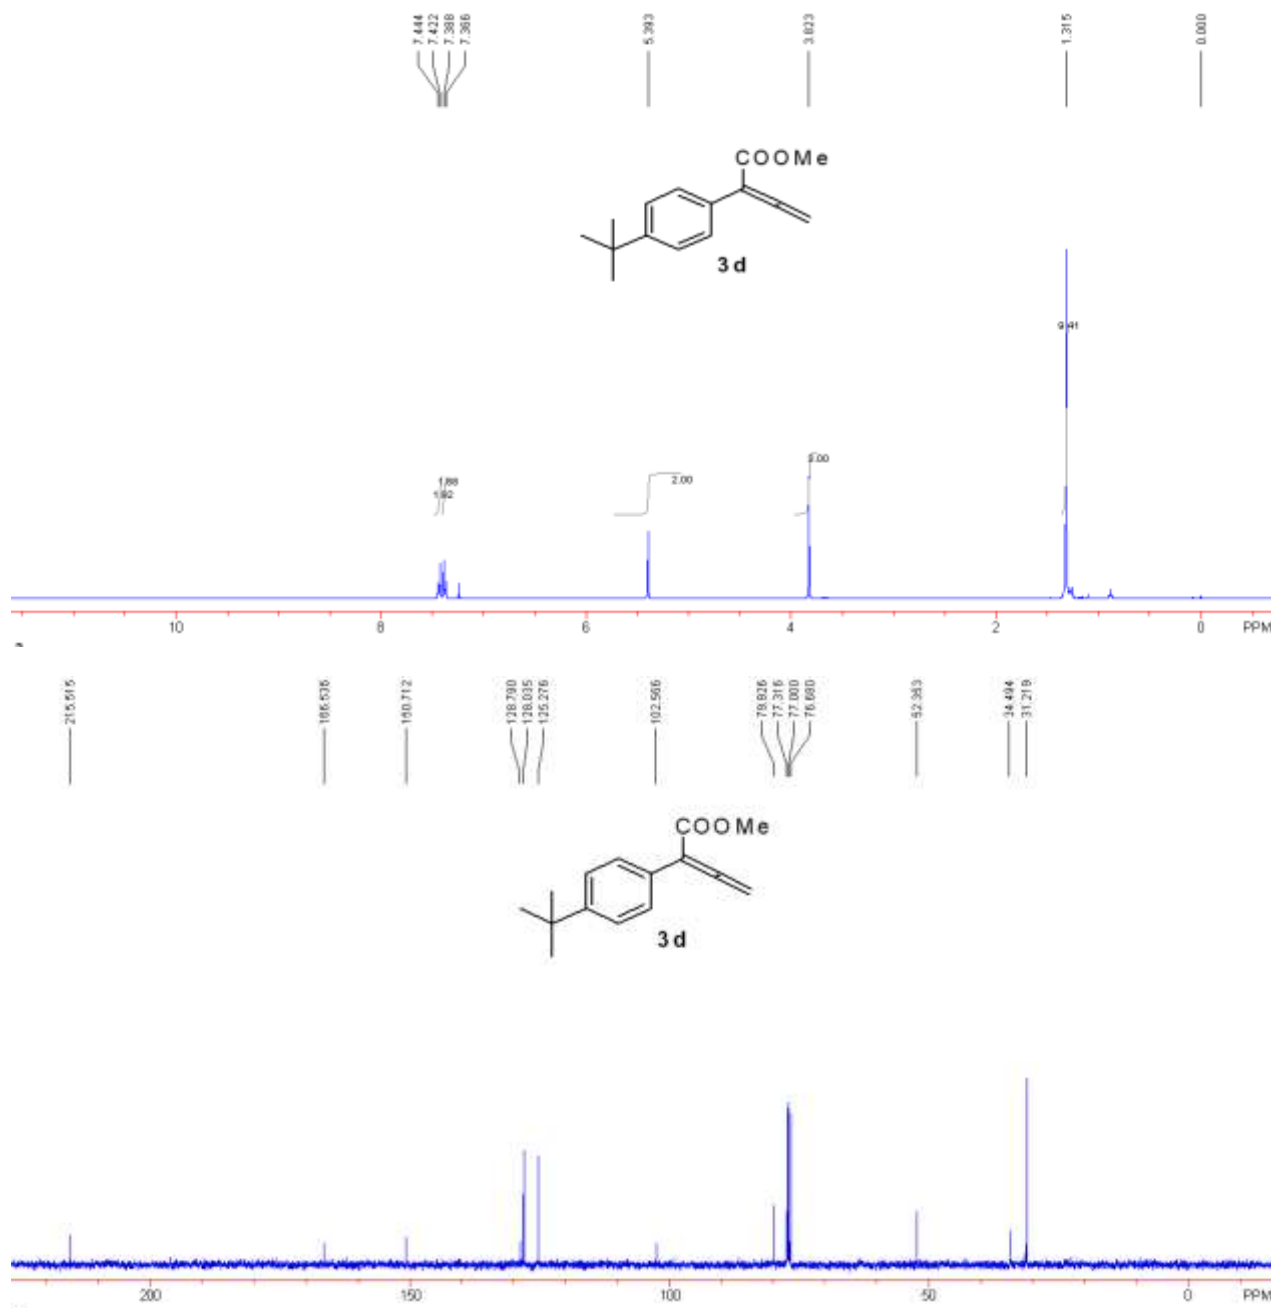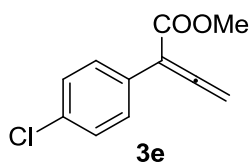

**methyl 2-(4-chlorophenyl)buta-2,3-dienoate **3e**:** Following the general procedure, the mixture was purified by column chromatography using silica gel to give the target product **3e** (40 mg, 96% yield). A yellow oil. IR ( $\text{CH}_2\text{Cl}_2$ ):  $\nu$  2951, 1954, 1924, 1717, 1490, 1434, 1398, 1240, 1140, 1093, 1027,

1012, 904, 852, 830, 780  $\text{cm}^{-1}$ ;  $^1\text{H}$  NMR (400 MHz,  $\text{CDCl}_3$ , TMS):  $\delta$  7.46 (2H, dd,  $J_1 = 6.8$  Hz,  $J_2 = 2.0$  Hz), 7.32 (2H, dd,  $J_1 = 6.8$  Hz,  $J_2 = 2.0$  Hz), 5.44 (2H, s), 3.83 (3H, s);  $^{13}\text{C}$  NMR ( $\text{CDCl}_3$ , 100 MHz):  $\delta$  215.5, 166.1, 133.6, 130.3, 129.7, 128.4, 101.9, 80.6, 52.5; MS (%)  $m/e$  208 (78), 179 (7), 165 (8), 149 (100), 145 (7), 137 (54), 114 (43), 102 (9); HRMS (EI) for  $\text{C}_{11}\text{H}_9\text{O}_2\text{Cl}$ : 208.0291; Found: 208.0296.

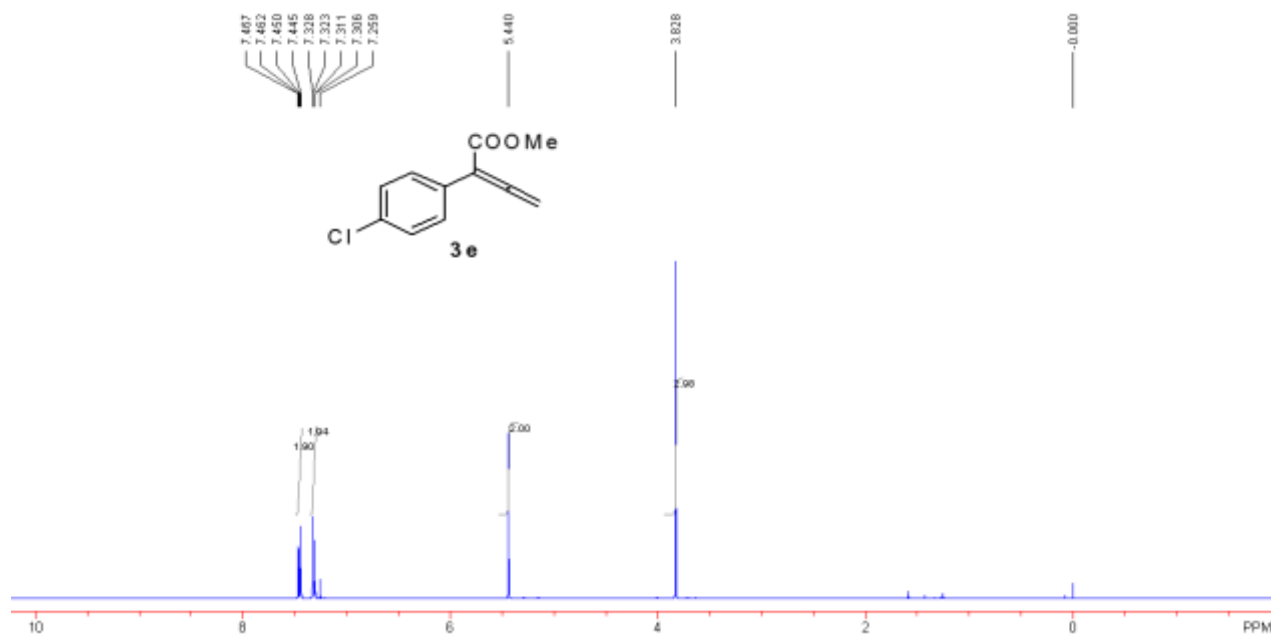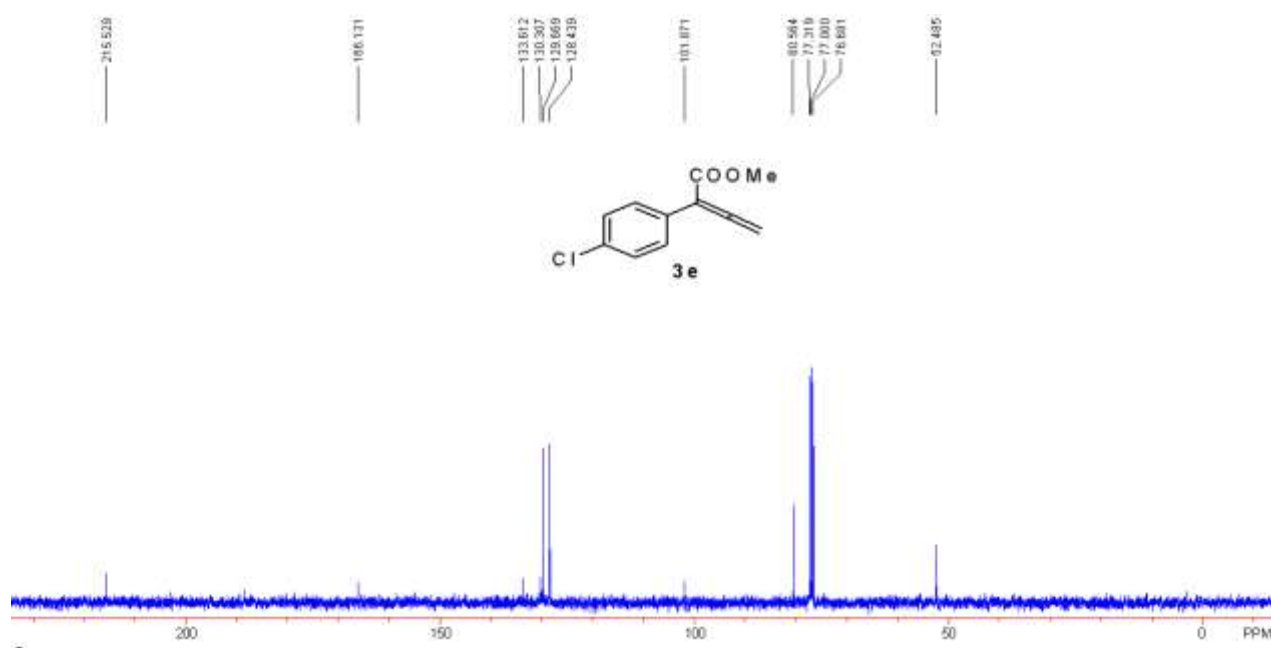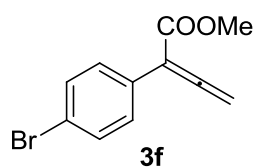

**methyl 2-(4-bromophenyl)buta-2,3-dienoate 3f:** Following the general procedure, the mixture was  
S56



purified by column chromatography using silica gel to give the target product **3f** (42 mg, 83% yield). A yellow oil. IR (CH<sub>2</sub>Cl<sub>2</sub>):  $\nu$  2961, 2854, 1957, 1921, 1720, 1487, 1434, 1398, 1260, 1145, 1096, 1019, 1010, 904, 797 cm<sup>-1</sup>; <sup>1</sup>H NMR (400 MHz, CDCl<sub>3</sub>, TMS):  $\delta$  7.47 (2H, dd,  $J_1$  = 6.8 Hz,  $J_2$  = 2.0 Hz), 7.32 (2H, dd,  $J_1$  = 6.8 Hz,  $J_2$  = 2.0 Hz), 5.43 (2H, s), 3.82 (3H, s); <sup>13</sup>C NMR (CDCl<sub>3</sub>, 100 MHz):  $\delta$  215.5, 166.0, 131.4, 130.8, 130.0, 121.8, 101.9, 80.6, 52.5; MS (%)  $m/e$  251 (16), 195 (95), 183 (67), 145 (17), 128 (20), 114 (100), 102 (27), 88 (41), 75 (15); HRMS (EI) for C<sub>11</sub>H<sub>9</sub>O<sub>2</sub>Br: 251.9786; Found: 251.9789.

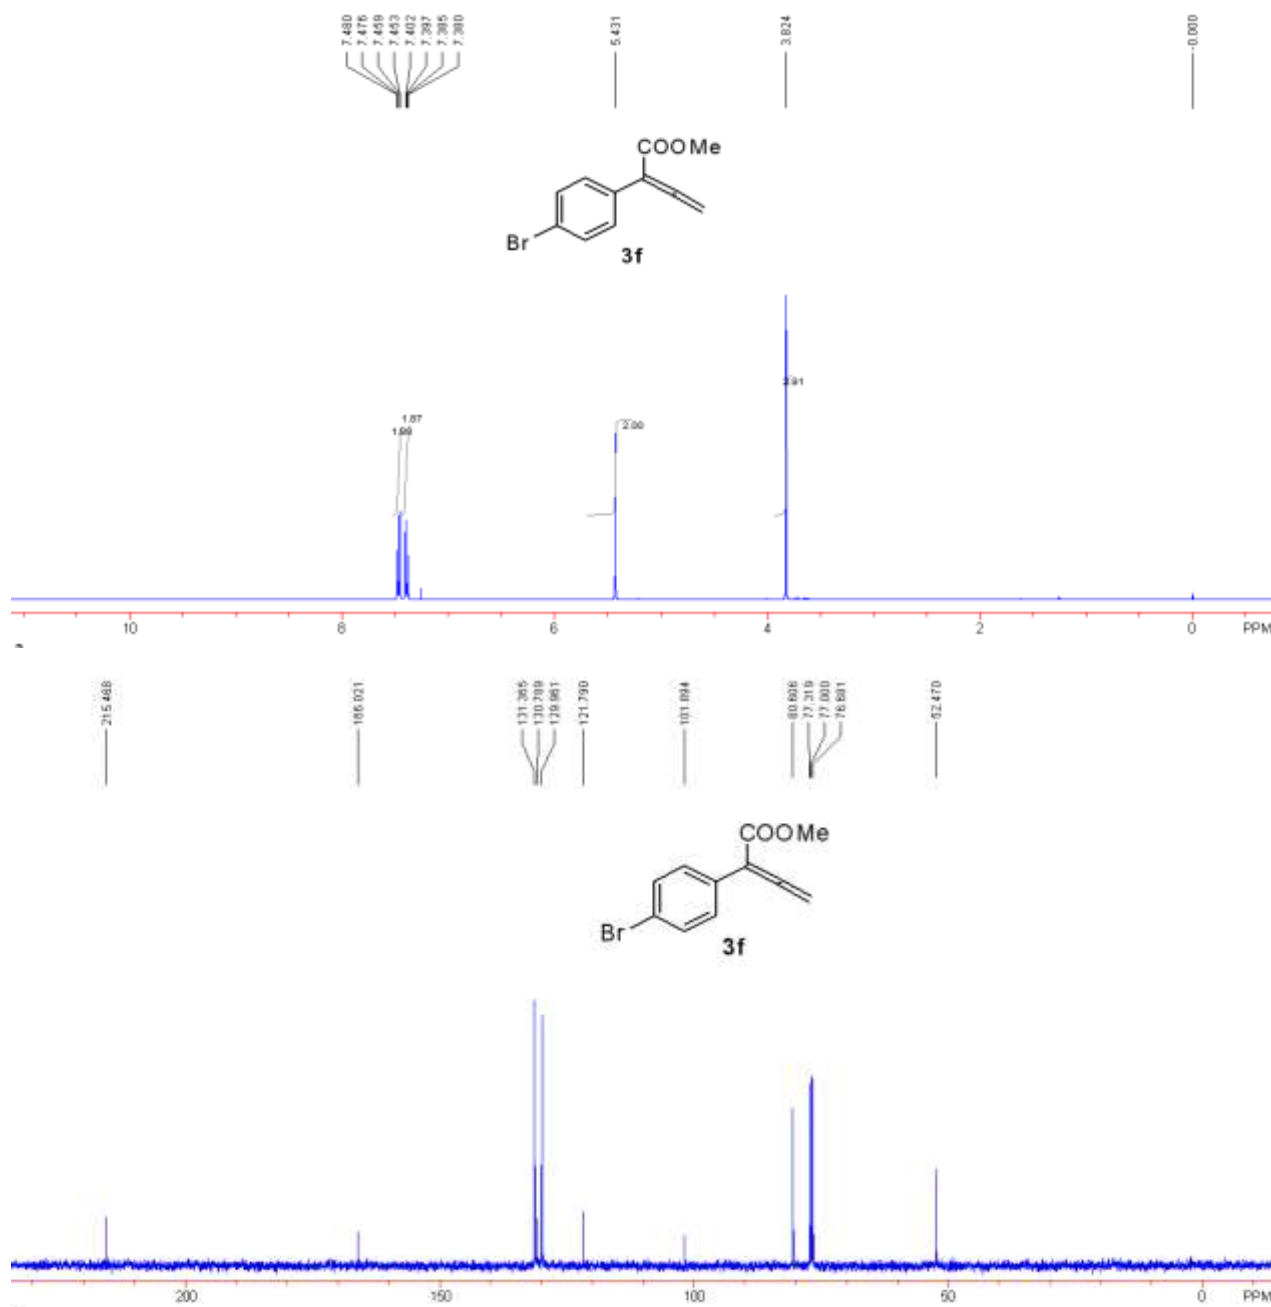

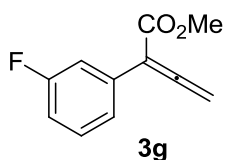

**methyl 2-(3-fluorophenyl)buta-2,3-dienoate 3g:** Following the general procedure, the mixture was purified by column chromatography using silica gel to give the target product **3g** (52 mg, 90% yield). A yellow oil. IR (CH<sub>2</sub>Cl<sub>2</sub>):  $\nu$  2953, 2256, 1955, 1717, 1613, 1585, 1486, 1435, 1277, 1248, 1130, 1036, 905, 853, 790 cm<sup>-1</sup>; <sup>1</sup>H NMR (400 MHz, CDCl<sub>3</sub>, TMS):  $\delta$  7.32-7.26 (4H, m), 7.00-6.96 (1H, m), 5.47 (2H, s), 3.84 (3H, s); <sup>13</sup>C NMR (CDCl<sub>3</sub>, 100 MHz):  $\delta$  215.7, 166.0, 163.8, 161.4, 134.0 (d,  $J_{C-F}$  = 8.1 Hz), 129.6 (d,  $J_{C-F}$  = 8.1 Hz), 124.0 (d,  $J_{C-F}$  = 2.9 Hz), 115.4 (d,  $J_{C-F}$  = 23.1 Hz), 114.7 (d,  $J_{C-F}$  = 21.2 Hz), 102.0 (d,  $J_{C-F}$  = 2.6 Hz), 80.7, 52.5; <sup>19</sup>F NMR (376 MHz, CDCl<sub>3</sub>, CFCl<sub>3</sub>):  $\delta$  -113.2- -113.3 (m); MS (%)  $m/e$  192 (54), 177 (4), 163 (5), 146 (9), 133 (100), 121 (26), 107 (22), 83 (18), 59 (30); HRMS (EI) for C<sub>11</sub>H<sub>9</sub>O<sub>2</sub>F: 192.0587; Found: 192.0585.

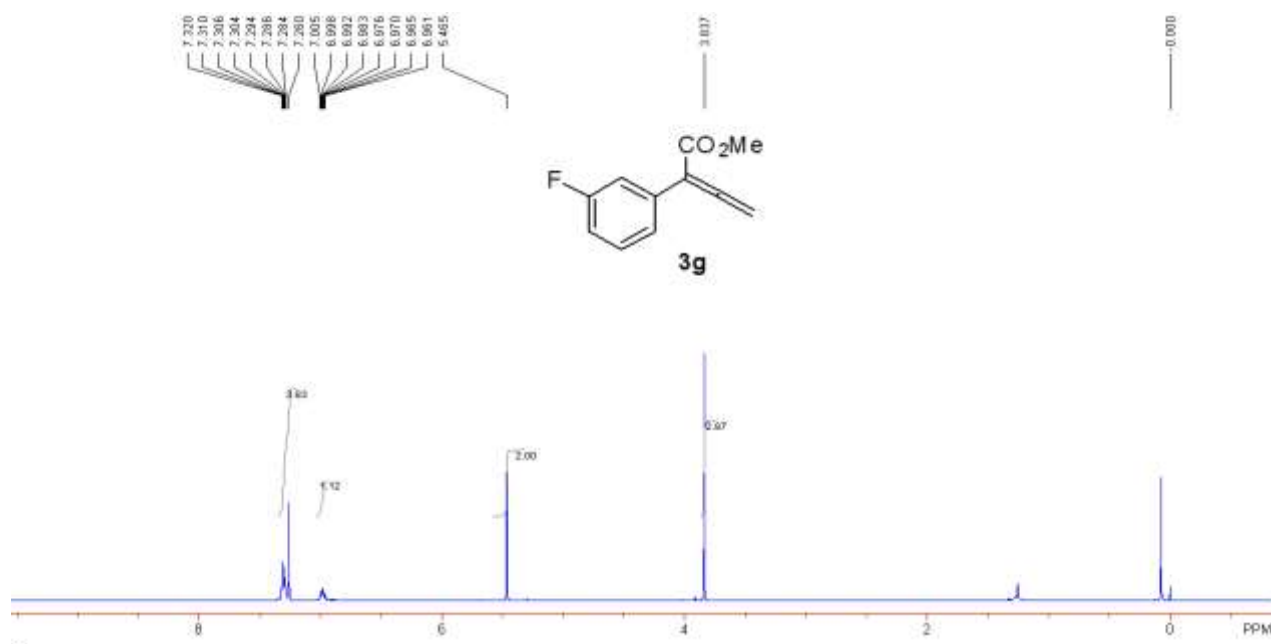

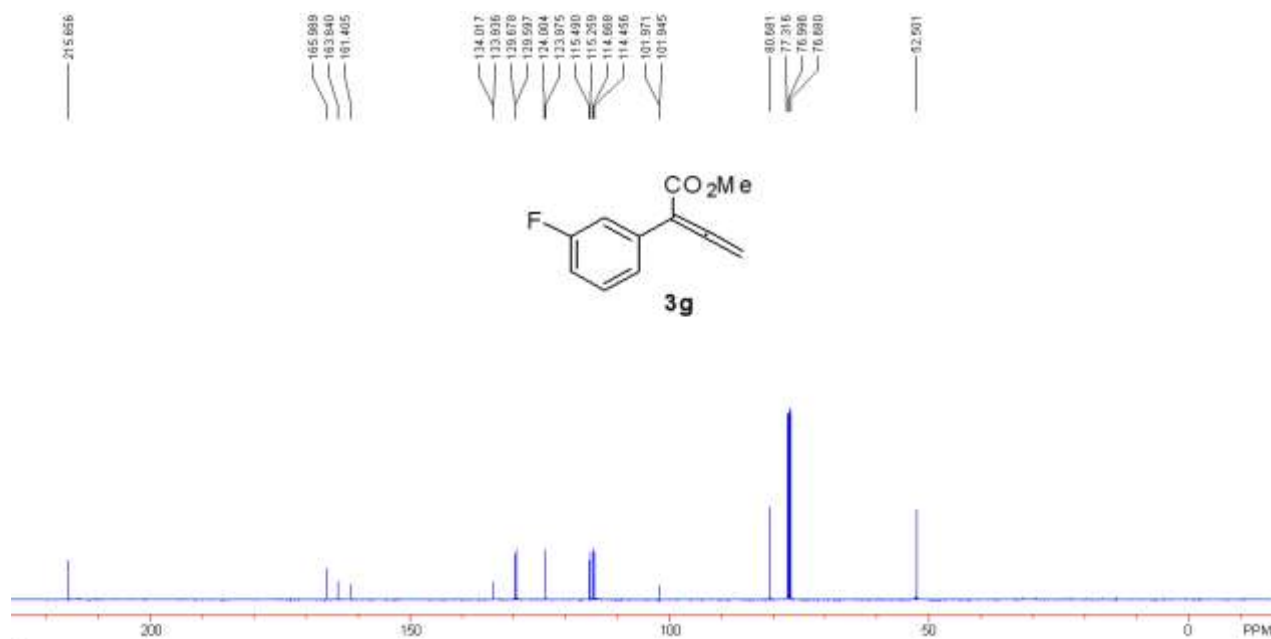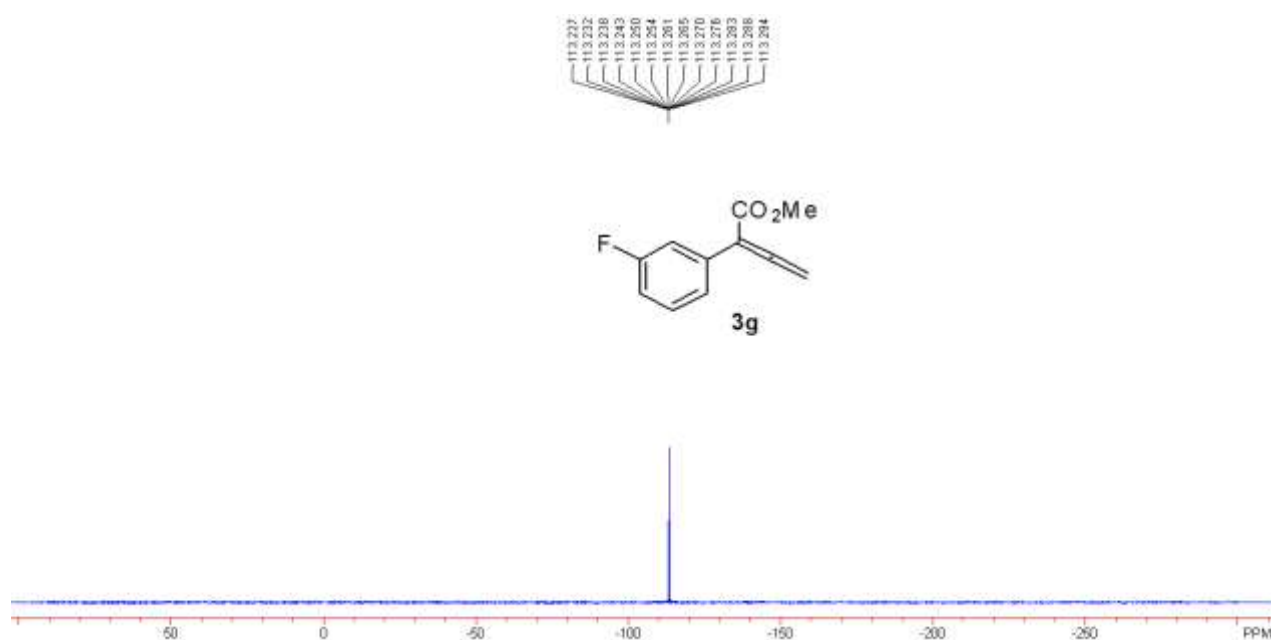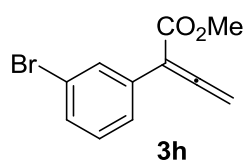

**methyl 2-(3-bromophenyl)buta-2,3-dienoate 3h:** Following the general procedure, the mixture was purified by column chromatography using silica gel to give the target product **3h** (45 mg, 89% yield). A yellow oil. IR (CH<sub>2</sub>Cl<sub>2</sub>):  $\nu$  2952, 2924, 2853, 1954, 1923, 1719, 1591, 1560, 1473, 1433, 1261, 1146, 1075, 918, 852, 789 cm<sup>-1</sup>; <sup>1</sup>H NMR (400 MHz, CDCl<sub>3</sub>, TMS):  $\delta$  7.67 (1H, d,  $J$  = 1.2 Hz), 7.46 (1H, d,  $J$  = 8.0 Hz), 7.30 (1H, d,  $J$  = 8.4 Hz), 7.26-7.20 (1H, m), 5.47 (2H, s), 3.83 (3H, s); <sup>13</sup>C NMR (CDCl<sub>3</sub>, 100 MHz):  $\delta$  215.6, 165.9, 133.9, 131.2, 130.7, 129.7, 127.0, 122.3, 101.7, 80.7, 52.5;

MS (%)  $m/e$  251 (13), 195 (72), 183 (24), 153 (18), 128 (30), 117 (48), 114 (100), 102 (29), 88 (43), 43 (82); HRMS (EI) for  $C_{11}H_9O_2Br$ : 251.9786; Found: 251.9788.

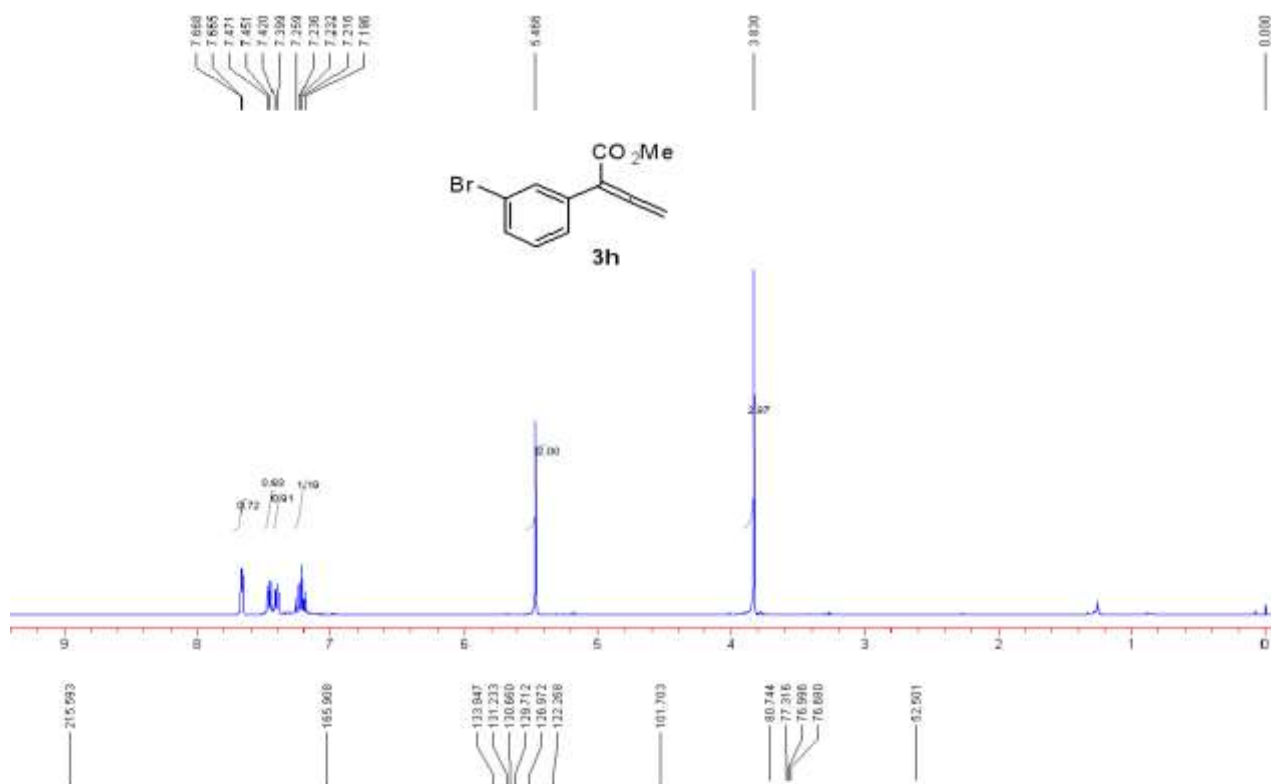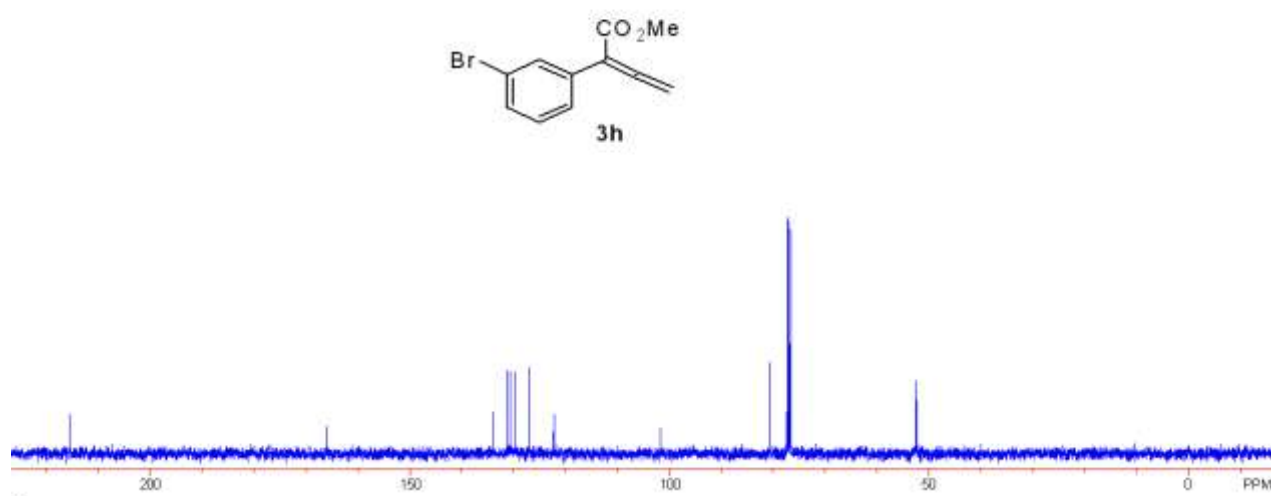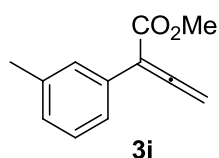

**methyl 2-m-tolylbuta-2,3-dienoate 3i:** Following the general procedure, the mixture was purified by column chromatography using silica gel to give the target product **3i** (34 mg, 90% yield). A yellow oil. IR ( $CH_2Cl_2$ ):  $\nu$  2961, 1953, 1924, 1720, 1605, 1487, 1434, 1258, 1137, 1090, 1017, 855, 794  $cm^{-1}$ ;  $^1H$  NMR (400 MHz,  $CDCl_3$ , TMS):  $\delta$  7.29 (2H, d,  $J$  = 7.6 Hz), 7.23 (1H, t,  $J$  = 7.6 Hz),

7.09 (1H, d,  $J = 7.2$  Hz), 5.39 (2H, s), 3.82 (3H, s), 2.35 (3H, s);  $^{13}\text{C}$  NMR ( $\text{CDCl}_3$ , 100 MHz):  $\delta$  215.4, 166.4, 137.8, 131.6, 128.9, 128.4, 128.1, 125.4, 102.7, 80.0, 52.3, 21.3; MS (%)  $m/e$  188 (57), 173 (11), 159 (7), 145 (11), 129 (81), 117 (41), 102 (21), 58 (32), 43 (100); HRMS (EI) for  $\text{C}_{12}\text{H}_{12}\text{O}_2$ : 188.0837; Found: 188.0835.

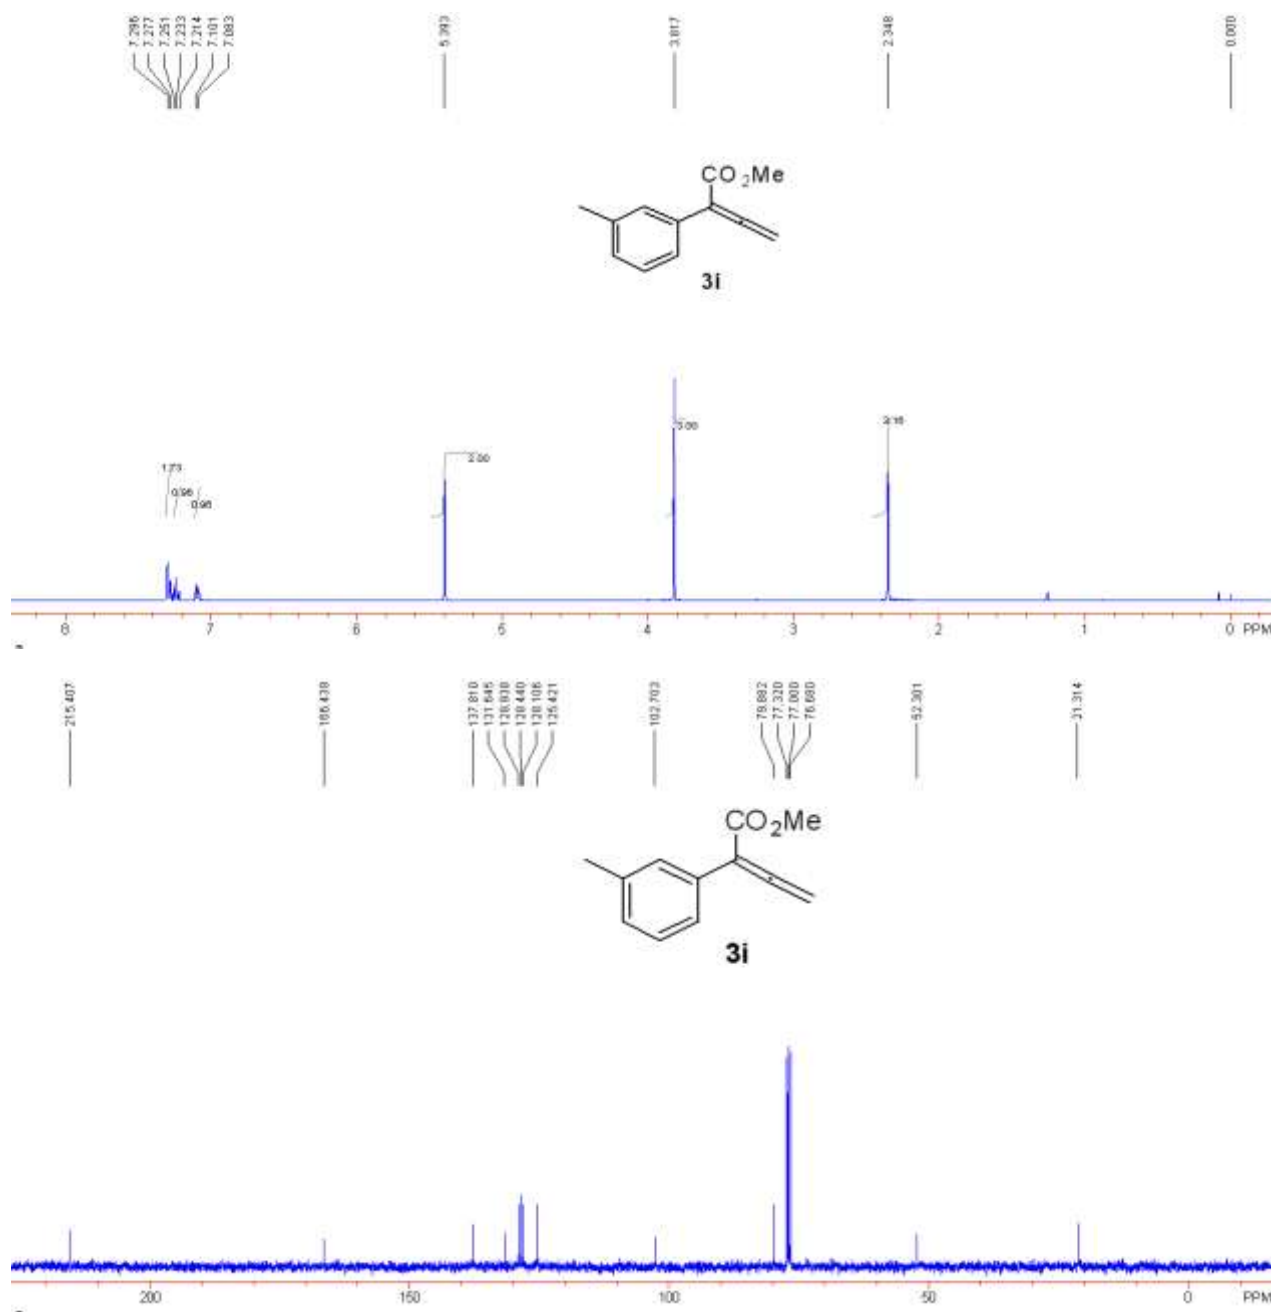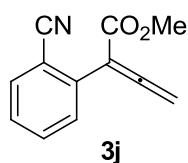

**methyl 2-(2-cyanophenyl)buta-2,3-dienoate 3j:** Following the general procedure, the mixture was purified by column chromatography using silica gel to give the target product **3j** (36 mg, 90% yield).

A white solid. m.p. for **3j** = 95-96 °C. IR (CH<sub>2</sub>Cl<sub>2</sub>):  $\nu$  2962, 2224, 1960, 1715, 1434, 1259, 1089, 1016, 908, 863, 796 cm<sup>-1</sup>; <sup>1</sup>H NMR (400 MHz, CDCl<sub>3</sub>, TMS):  $\delta$  7.70 (1H, d,  $J$  = 8.0 Hz), 7.61 (1H, t,  $J$  = 7.2 Hz), 7.55 (1H, d,  $J$  = 7.6 Hz), 7.42 (1H, t,  $J$  = 7.2 Hz), 5.53 (2H, s), 3.85 (3H, s); <sup>13</sup>C NMR (CDCl<sub>3</sub>, 100 MHz):  $\delta$  214.9, 165.5, 136.0, 133.5, 132.4, 130.8, 128.3, 117.5, 112.9, 81.5, 52.8; MS (%)  $m/e$  199 (55), 184 (4), 170 (12), 154 (19), 140 (100), 128 (22), 113 (44), 63 (17); HRMS (EI) for C<sub>12</sub>H<sub>9</sub>NO<sub>2</sub>: 199.0633; Found: 199.0636.

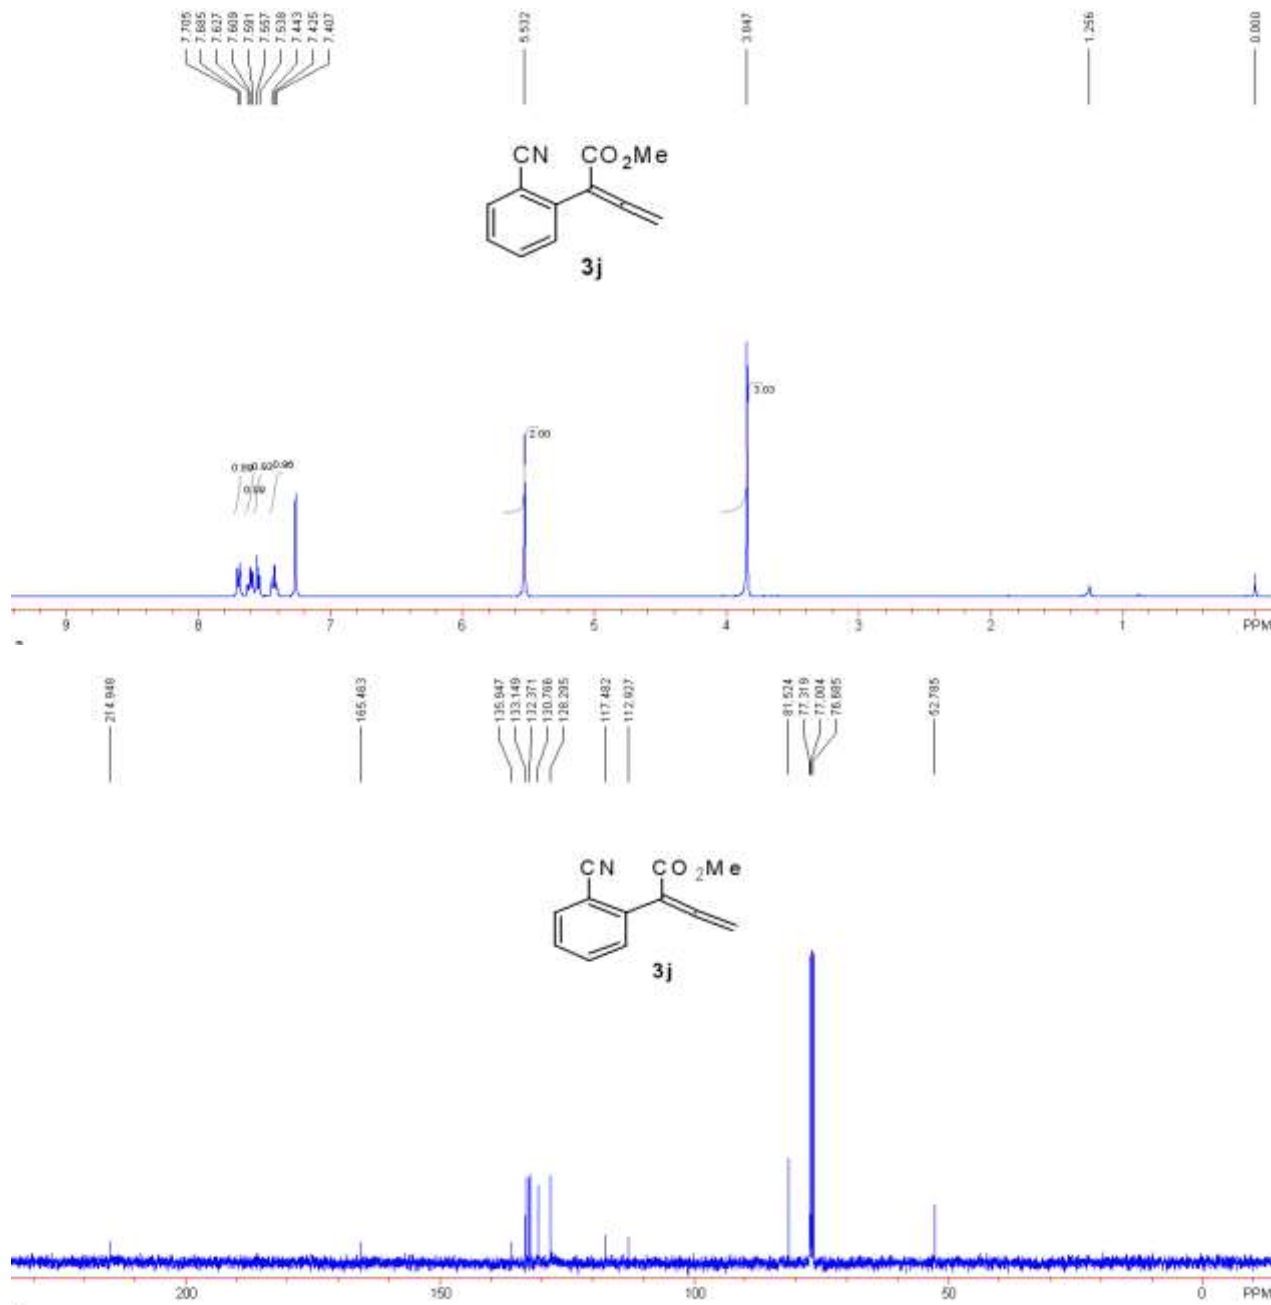

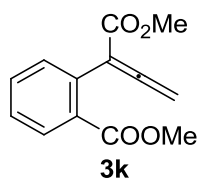

**methyl 2-(1-methoxy-1-oxobuta-2,3-dien-2-yl)benzoate 3k:** Following the general procedure, the mixture was purified by column chromatography using silica gel to give the target product **3k** (25 mg, 54% yield). A white solid. m.p. for **3k** = 87-88 °C. IR (CH<sub>2</sub>Cl<sub>2</sub>):  $\nu$  2962, 1720, 1434, 1262, 1084, 1016, 860, 796, 733 cm<sup>-1</sup>; <sup>1</sup>H NMR (400 MHz, CDCl<sub>3</sub>, TMS):  $\delta$  7.99 (1H, dd,  $J_1$  = 7.6 Hz,  $J_2$  = 1.2 Hz), 7.51 (1H, dt,  $J_1$  = 7.6 Hz,  $J_2$  = 1.2 Hz), 7.40 (1H, dt,  $J_1$  = 7.6 Hz,  $J_2$  = 1.2 Hz), 7.34 (1H, dd,  $J_1$  = 7.6 Hz,  $J_2$  = 1.2 Hz), 5.39 (2H, s), 3.85 (3H, s), 3.77 (3H, s); <sup>13</sup>C NMR (CDCl<sub>3</sub>, 100 MHz):  $\delta$  213.7, 167.3, 166.5, 133.9, 132.2, 131.4, 130.5, 129.7, 128.2, 79.8, 52.4, 52.0; MS (%) m/e 232 (100), 217 (41), 201 (35), 173 (33), 161 (41), 143 (57), 129 (64), 115 (59), 102 (58), 88 (28); HRMS (EI) for C<sub>13</sub>H<sub>12</sub>O<sub>4</sub>: 232.0736; Found: 232.0736.

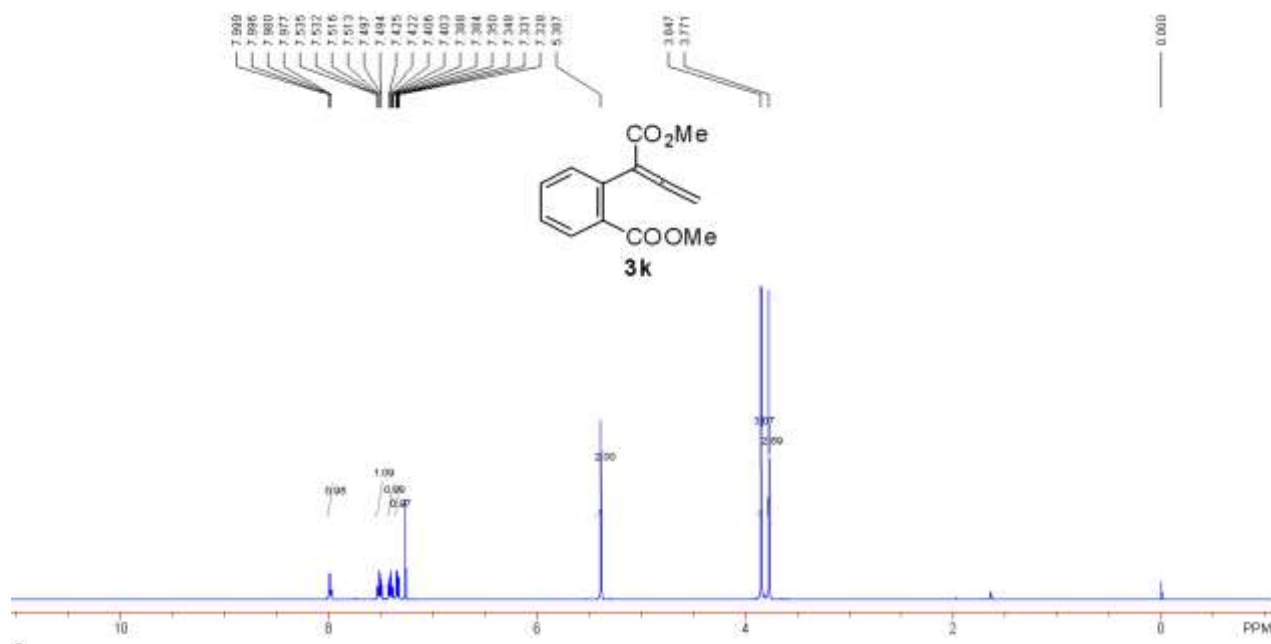

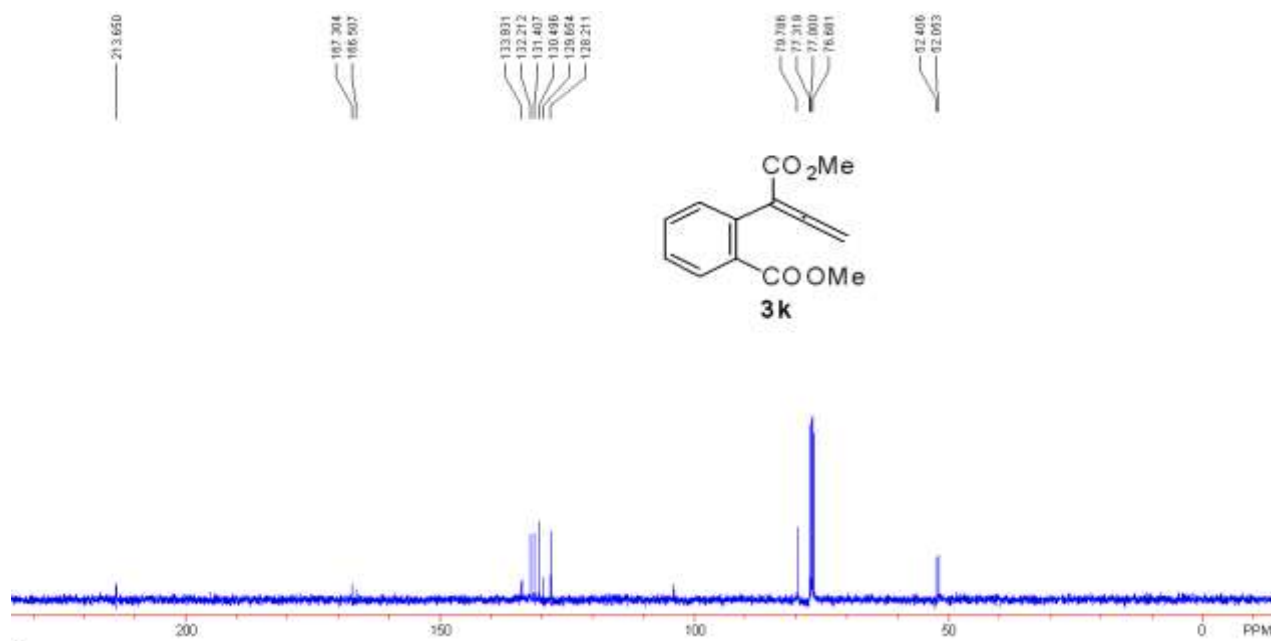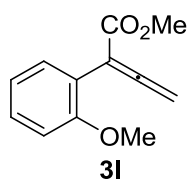

**methyl 2-(2-methoxyphenyl)buta-2,3-dienoate 3l**: Following the general procedure, the mixture was purified by column chromatography using silica gel to give the target product **3l** (38 mg, 93% yield). A yellow oil. IR (CH<sub>2</sub>Cl<sub>2</sub>):  $\nu$  2961, 1963, 1718, 1597, 1494, 1463, 1434, 1258, 1144, 1104, 1017, 905, 799, 733 cm<sup>-1</sup>; <sup>1</sup>H NMR (400 MHz, CDCl<sub>3</sub>, TMS):  $\delta$  7.33-7.29 (1H, m), 7.22 (1H, dd,  $J_1$  = 7.6 Hz,  $J_2$  = 2.0 Hz), 6.95 (1H, dt,  $J_1$  = 7.6 Hz,  $J_2$  = 1.2 Hz), 6.91 (1H, d,  $J$  = 7.6 Hz), 5.29 (2H, s), 3.81 (3H, s), 3.78 (3H, s); <sup>13</sup>C NMR (CDCl<sub>3</sub>, 100 MHz):  $\delta$  214.1, 166.6, 156.8, 130.6, 129.7, 122.1, 120.6, 111.1, 100.1, 78.7, 55.7, 52.4; MS (%)  $m/e$  204 (17), 189 (100), 172 (11), 159 (23), 145 (12), 115 (53), 102 (18), 91 (25); HRMS (EI) for C<sub>12</sub>H<sub>12</sub>O<sub>3</sub>: 204.0786; Found: 204.0784.



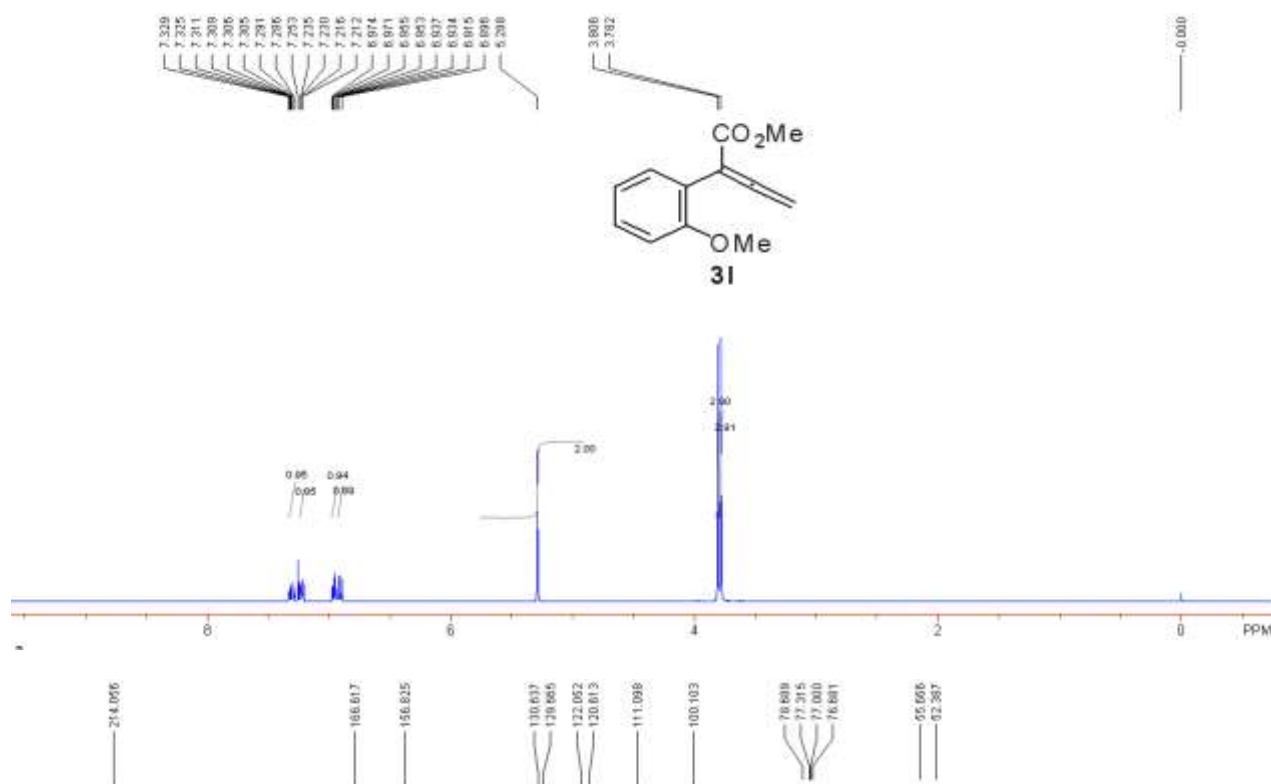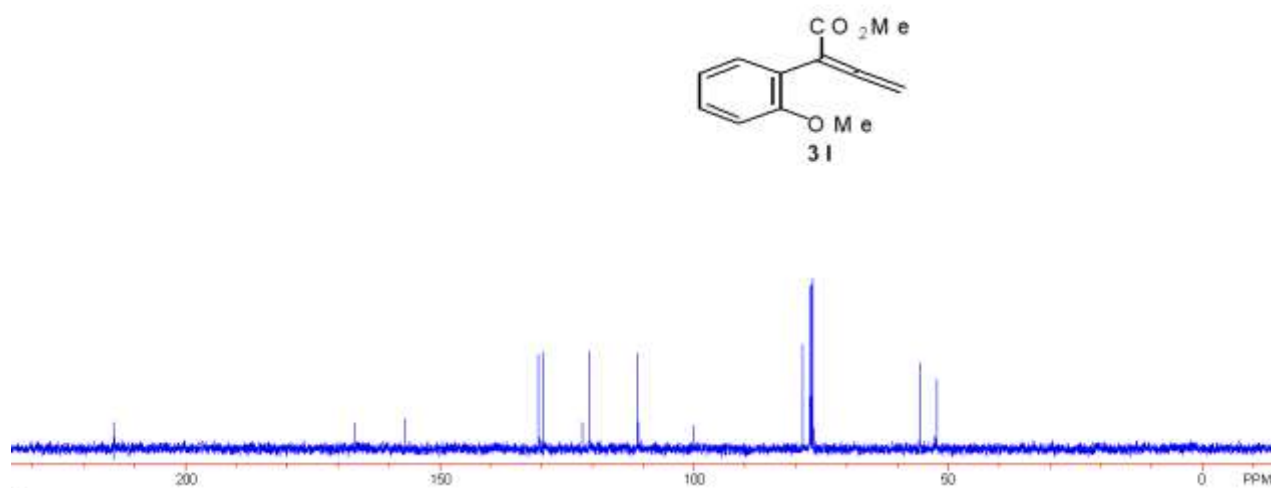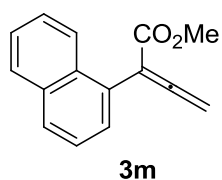

**methyl 2-(naphthalen-1-yl)buta-2,3-dienoate 3m**: Following the general procedure, the mixture was purified by column chromatography using silica gel to give the target product **3m** (35 mg, 78% yield). A yellow oil. IR (CH<sub>2</sub>Cl<sub>2</sub>):  $\nu$  2962, 1967, 1732, 1580, 1477, 1434, 1259, 1088, 1017, 864, 796 cm<sup>-1</sup>; <sup>1</sup>H NMR (400 MHz, CDCl<sub>3</sub>, TMS):  $\delta$  7.88-7.84 (3H, m), 7.51-7.44 (4H, m), 5.34 (2H, s), 3.79 (3H, s); <sup>13</sup>C NMR (CDCl<sub>3</sub>, 100 MHz):  $\delta$  215.0, 166.8, 133.7, 131.7, 130.1, 128.8, 128.4, 127.8,

126.3, 125.8, 125.3, 125.0, 100.9, 78.6, 52.6; MS (%) m/e 224 (15), 209 (9), 192 (25), 165 (86), 163 (27), 153 (11), 139 (8), 58 (32), 43 (100); HRMS (EI) for C<sub>15</sub>H<sub>12</sub>O: 224.0837; Found: 224.0839.

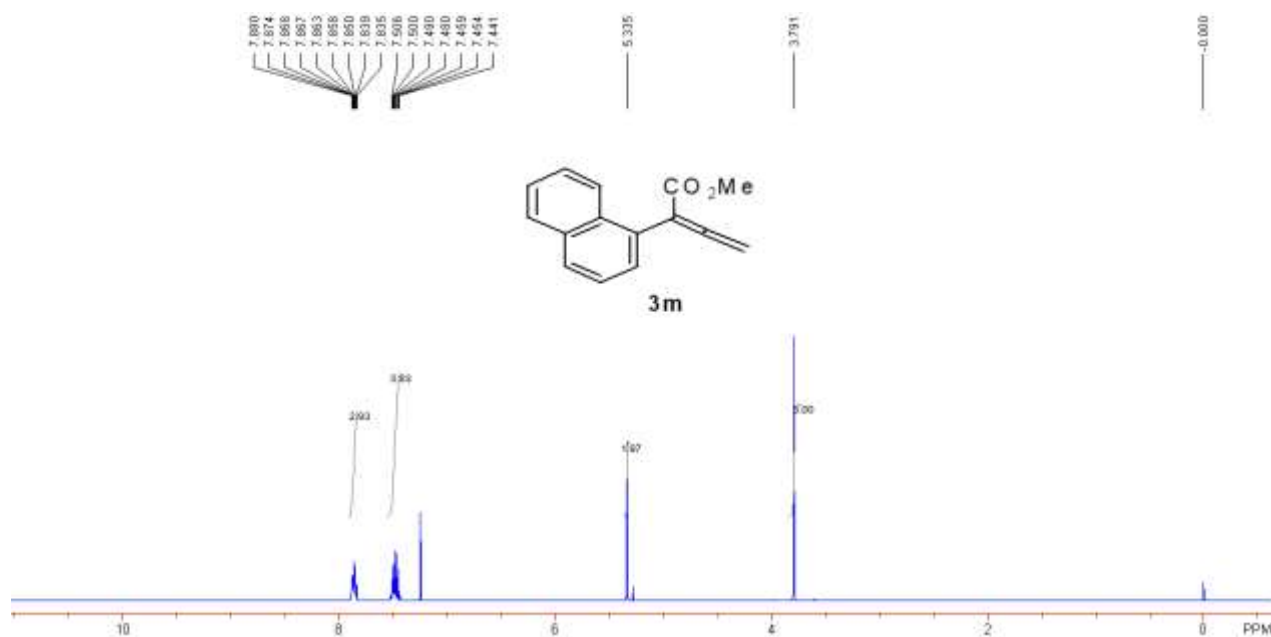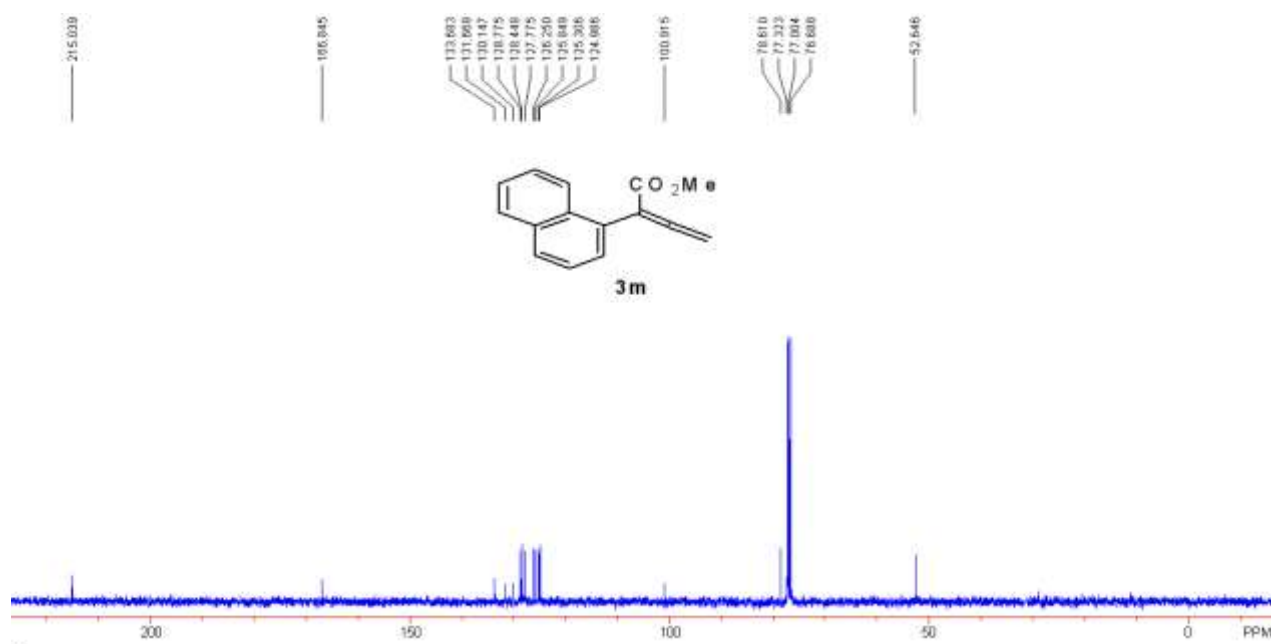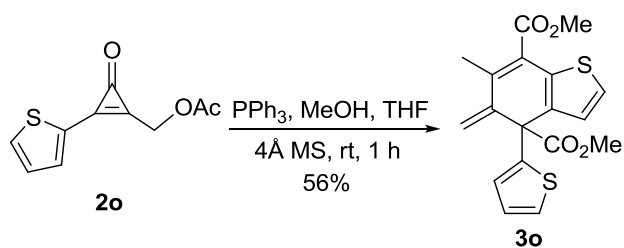

dimethyl

6-methyl-5-methylene-4-(thiophen-2-yl)-4,5-dihydrobenzo[b]thiophene-4,7-dicarboxylate 3o:

Following the general procedure, but the catalyst was switched to  $\text{PPh}_3$ . After the starting material was consumed, the resulting mixture was purified by column chromatography using silica gel to give the target product **3o** (20 mg, 56% yield). A white solid. m.p. for **3o** = 147-148 °C. IR ( $\text{CH}_2\text{Cl}_2$ ):  $\nu$  2960, 1731, 1434, 1338, 1260, 1210, 1095, 1066, 1015, 839, 795  $\text{cm}^{-1}$ ;  $^1\text{H}$  NMR (400 MHz,  $\text{CDCl}_3$ , TMS):  $\delta$  7.24 (1H, dd,  $J_1 = 5.2$  Hz,  $J_2 = 0.8$  Hz), 7.17 (1H, d,  $J = 5.2$  Hz), 6.91 (1H, dd,  $J_1 = 5.2$  Hz,  $J_2 = 3.6$  Hz), 6.86 (1H, d,  $J = 4.8$  Hz), 6.78 (1H, dd,  $J_1 = 3.6$  Hz,  $J_2 = 0.8$  Hz), 5.83 (1H, s), 5.38 (1H, s), 3.90 (3H, s), 3.75 (3H, s), 2.30 (3H, s);  $^{13}\text{C}$  NMR ( $\text{CDCl}_3$ , 100 MHz):  $\delta$  172.8, 167.2, 148.3, 146.2, 136.4, 134.9, 131.7, 127.3, 127.1, 126.1, 125.7, 124.6, 122.3, 121.5, 57.7, 53.2, 51.9, 17.5; MS (ESI)  $m/e$  378.1 ( $\text{M}^+ + \text{NH}_4$ ); HRMS (ESI) for  $\text{C}_{18}\text{H}_{20}\text{NO}_4\text{S}_2$  ( $\text{M}^+ + \text{NH}_4$ ): 378.0828, Found: 378.0833.

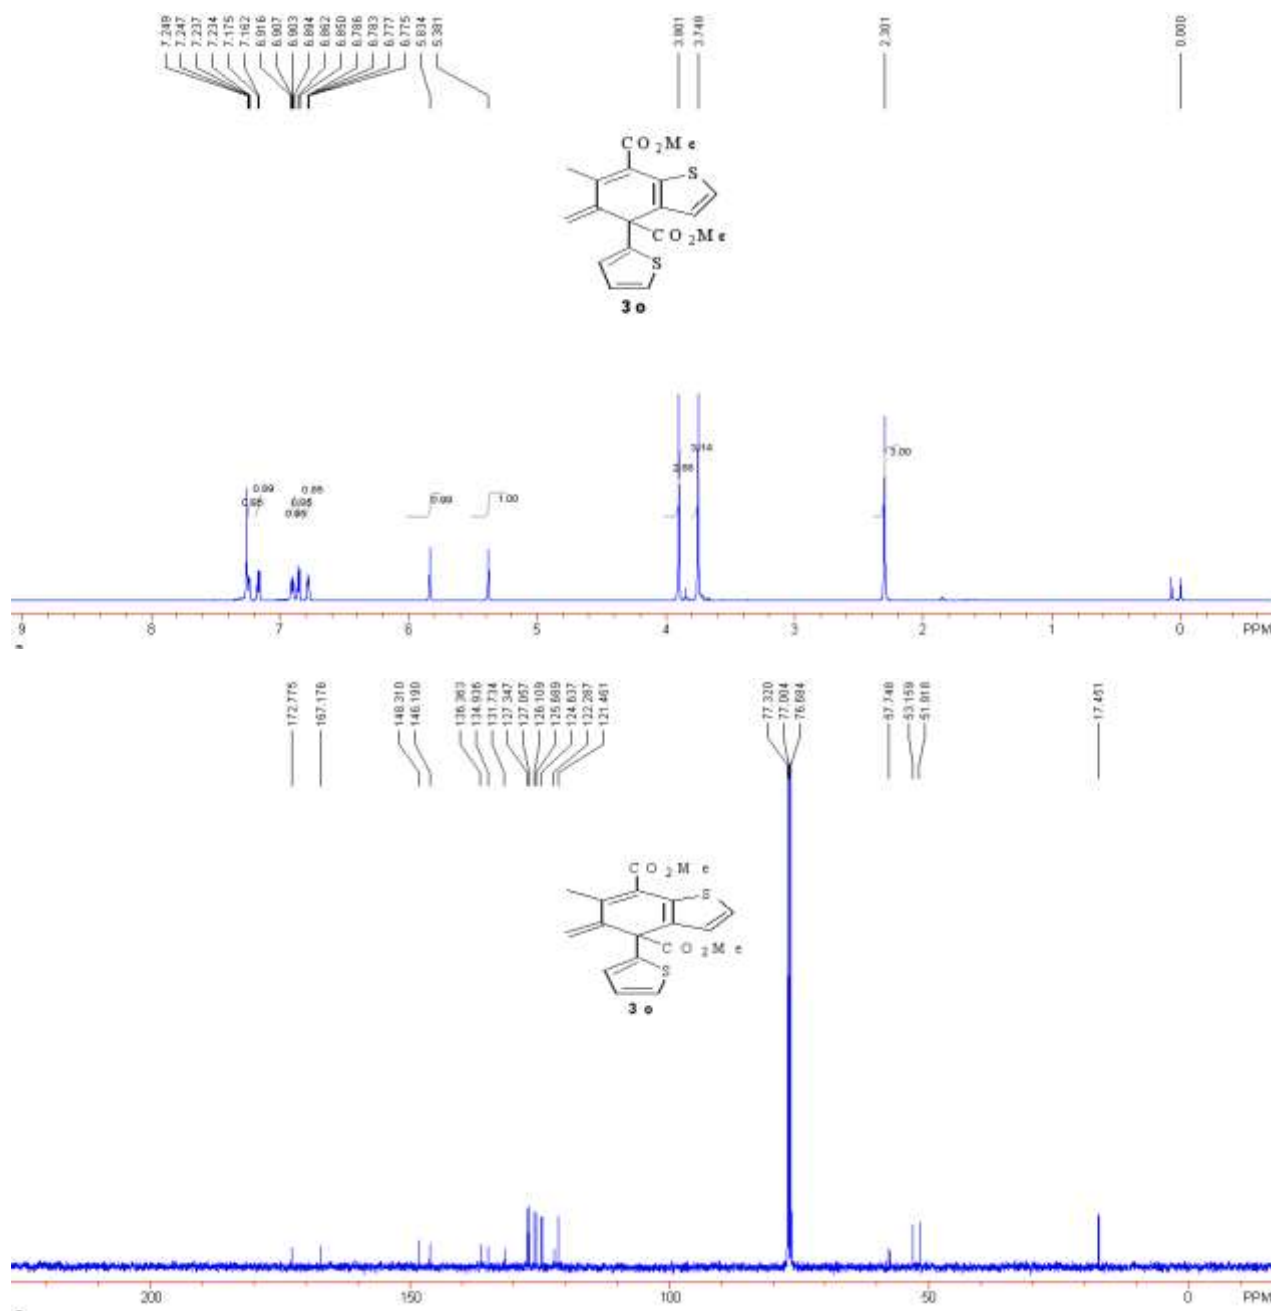

# General Procedure for the Preparation of **4** from the Reaction of **2p** with MeOH Using **4a** as an Example in the Presence of PPh<sub>3</sub>

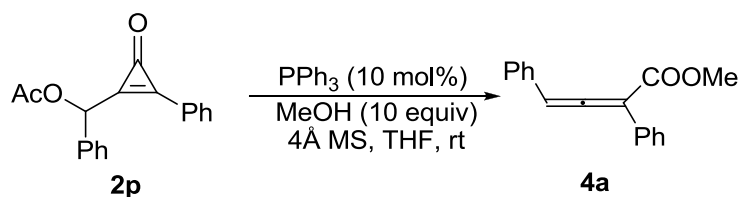

To a mixture of **2p** (0.20 mmol, 56 mg), MeOH (10.0 mmol), PPh<sub>3</sub> (0.02 mmol, 5.2 mg) and 50 mg 4Å MS was added 2.0 mL of THF at room temperature (25 °C) under argon. The reaction solution was monitored by TLC. After the reaction was completed, the solution was concentrated under reduced pressure and the residue was further purified by silica gel column chromatography (EtOAc/PE = 1/16) to give the target product **4a**.

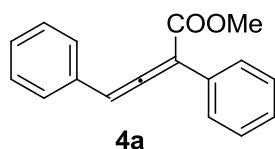

**methyl 2,4-diphenylbuta-2,3-dienoate 4a:** Following the general procedure, the mixture was purified by column chromatography using silica gel to give the target product **4a** (46 mg, 92% yield). A yellow oil. IR (CH<sub>2</sub>Cl<sub>2</sub>): ν 2961, 2926, 1720, 1598, 1493, 1466, 1434, 1260, 1216, 1092, 1018, 998, 798 cm<sup>-1</sup>; <sup>1</sup>H NMR (400 MHz, CDCl<sub>3</sub>, TMS): δ 7.57 (2H, d, *J* = 7.2 Hz), 7.39-7.24 (8H, m), 6.82 (1H, s), 3.83 (3H, s); <sup>13</sup>C NMR (CDCl<sub>3</sub>, 100 MHz): δ 214.6, 166.0, 133.8, 133.6, 132.0, 131.5, 129.0, 128.4, 128.3, 128.1, 128.0, 127.5, 106.4, 99.5, 52.5; MS (%) *m/e* 250 (51), 235 (13), 207 (14), 191 (100), 179 (10), 165 (13), 105 (23); HRMS (EI) for C<sub>17</sub>H<sub>14</sub>O<sub>2</sub>: 250.0994; Found: 250.0995.

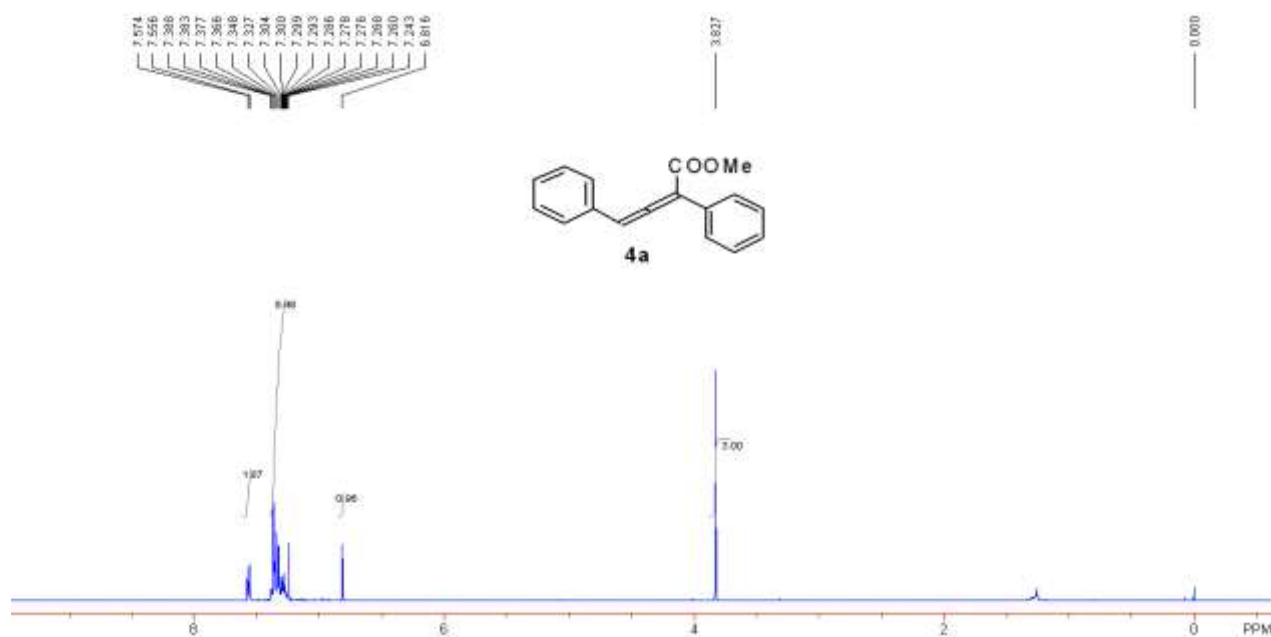

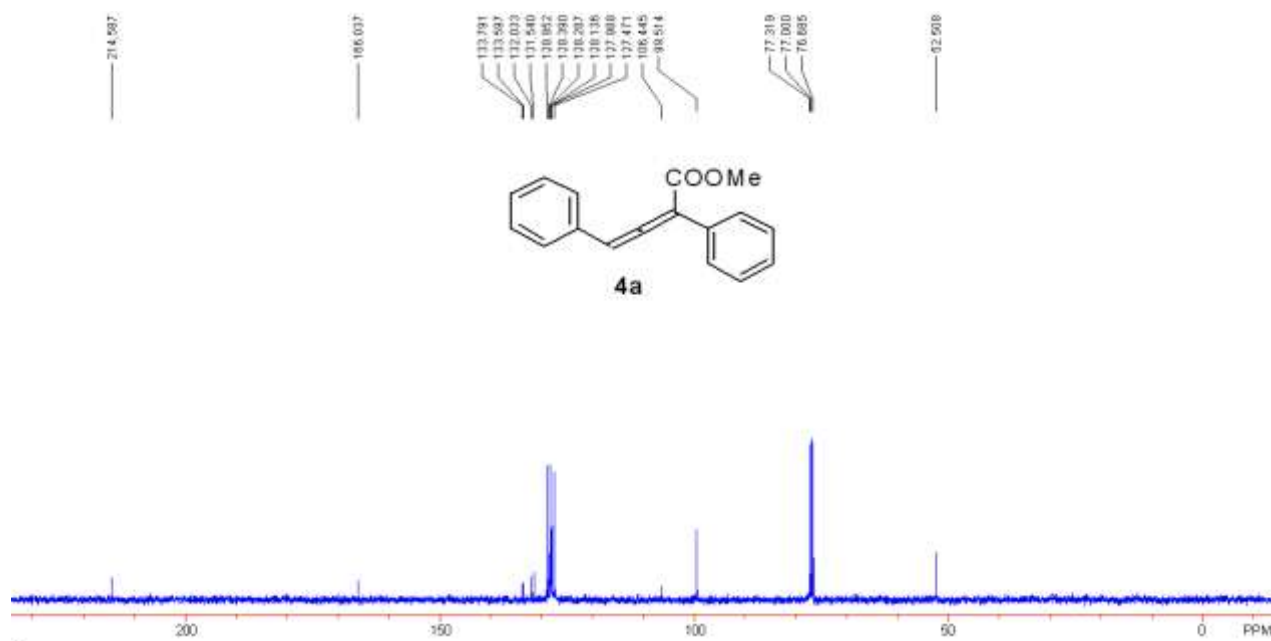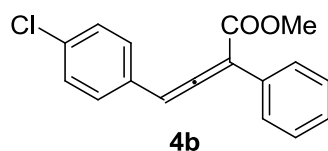

**methyl 4-(4-chlorophenyl)-2-phenylbuta-2,3-dienoate 4b:** Following the general procedure, the mixture was purified by column chromatography using silica gel to give the target product **4b** (53 mg, 93% yield). A white solid. m.p. for **4b** = 120-122 °C. IR (CH<sub>2</sub>Cl<sub>2</sub>):  $\nu$  2961, 1930, 1720, 1489, 1433, 1259, 1214, 1088, 1013, 845, 795 cm<sup>-1</sup>; <sup>1</sup>H NMR (400 MHz, CDCl<sub>3</sub>, TMS):  $\delta$  7.54 (2H, d,  $J$  = 7.2 Hz), 7.37-7.24 (7H, m), 6.77 (1H, s), 3.83 (3H, s); <sup>13</sup>C NMR (CDCl<sub>3</sub>, 100 MHz):  $\delta$  214.5, 165.8, 133.9, 133.8, 133.6, 131.7, 130.1, 129.1, 128.6, 128.4, 128.3, 128.1, 106.8, 98.6, 52.6; MS (%)  $m/e$  284 (38), 269 (12), 249 (27), 241 (8), 225 (100), 189 (59), 178 (10), 163 (10), 139 (23), 94 (12); HRMS (EI) for C<sub>17</sub>H<sub>13</sub>ClO<sub>2</sub>: 284.0604; Found: 284.0606.

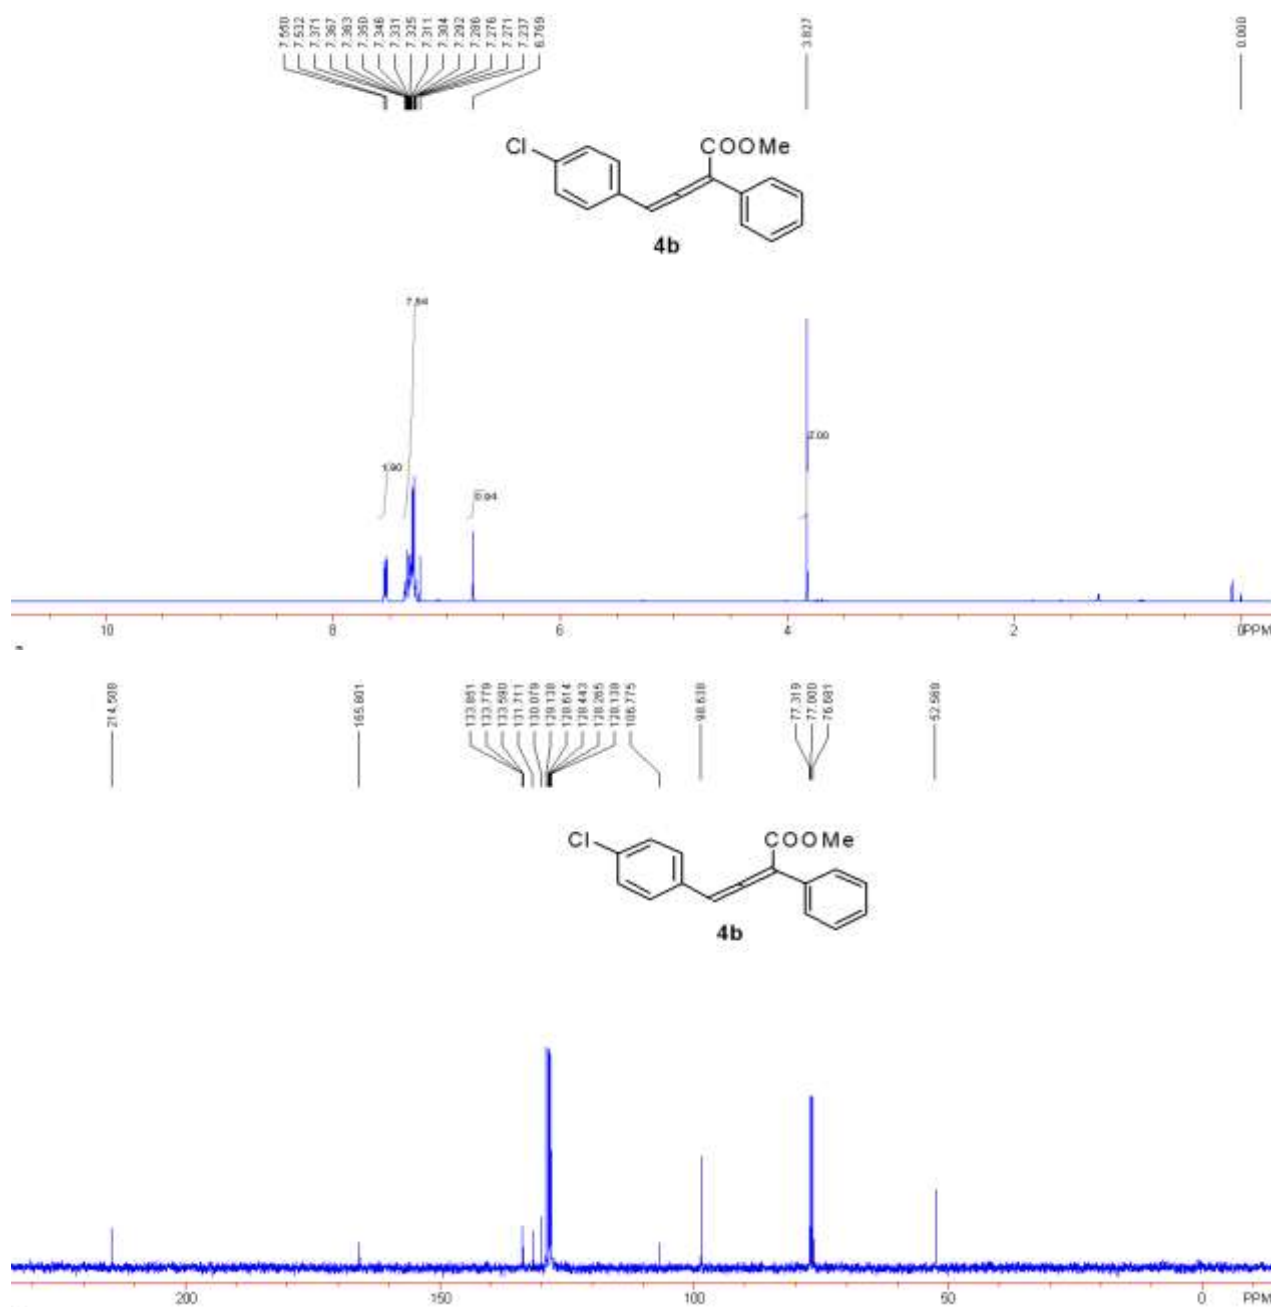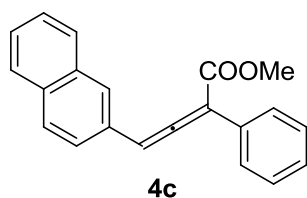

**methyl 4-(naphthalen-2-yl)-2-phenylbuta-2,3-dienoate 4c:** Following the general procedure, the mixture was purified by column chromatography using silica gel to give the target product **4c** (52mg, 87% yield). A white solid. m.p. for **4c** = 93-95 °C. IR (CH<sub>2</sub>Cl<sub>2</sub>): ν 3056, 2963, 1932, 1719, 1493, 1434, 1217, 1134, 1118, 1018, 896, 862, 781, 736 cm<sup>-1</sup>; <sup>1</sup>H NMR (400 MHz, CDCl<sub>3</sub>, TMS): δ 7.80-7.53 (4H, m), 7.61 (2H, d, *J* = 7.2 Hz), 7.51-7.43 (3H, m), 7.37-7.29 (3H, m), 6.98 (1H, s), 3.83

(3H, s);  $^{13}\text{C}$  NMR ( $\text{CDCl}_3$ , 100 MHz):  $\delta$  215.1, 166.0, 133.8, 133.6, 133.1, 132.0, 129.0, 128.7, 128.5, 128.4, 128.3, 128.0, 127.8, 127.7, 126.8, 126.5, 126.3, 124.7, 106.6, 99.9, 52.5; MS (%)  $m/e$  300 (71), 285 (15), 262 (53), 257 (21), 241 (100), 229 (17), 183 (58), 155 (22), 115 (25); HRMS (EI) for  $\text{C}_{21}\text{H}_{16}\text{O}_2$ : 300.1150; Found: 300.1154.

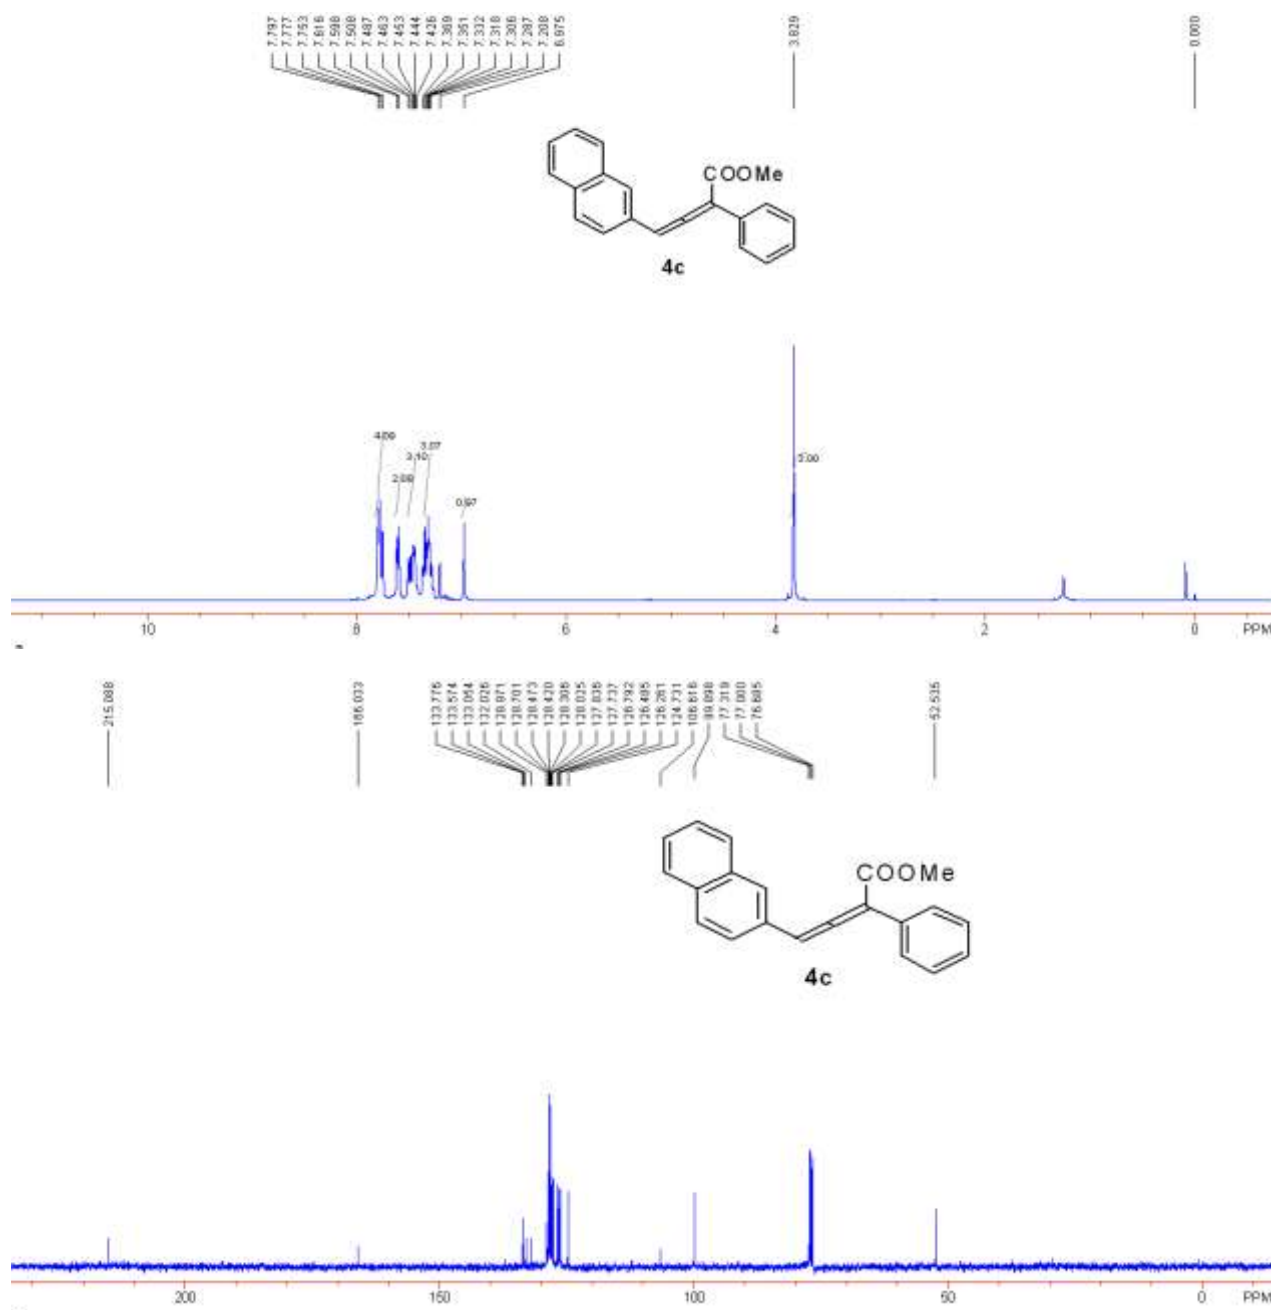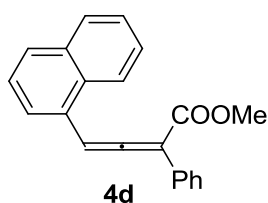

**methyl 4-(naphthalen-1-yl)-2-phenylbuta-2,3-dienoate 4d**: Following the general procedure, the

mixture was purified by column chromatography using silica gel to give the target product **4d** (48 mg, 80% yield). A yellow oil. IR (CH<sub>2</sub>Cl<sub>2</sub>):  $\nu$  3055, 2950, 1931, 1719, 1493, 1433, 1263, 1217, 1133, 1089, 1017, 897, 862, 799, 779 cm<sup>-1</sup>; <sup>1</sup>H NMR (400 MHz, CDCl<sub>3</sub>, TMS):  $\delta$  8.22 (1H, d,  $J$  = 7.6 Hz), 7.87 (1H, d,  $J$  = 7.2 Hz), 7.81 (1H, d,  $J$  = 8.0 Hz), 7.62 (3H, t,  $J$  = 7.2 Hz), 7.54-7.44 (4H, m), 7.37-7.24 (3H, m), 3.87 (3H, s); <sup>13</sup>C NMR (CDCl<sub>3</sub>, 100 MHz):  $\delta$  215.5, 166.2, 134.0, 132.1, 130.8, 128.8, 128.4, 128.3, 127.9, 126.6, 126.57, 126.0, 125.6, 123.6, 105.4, 96.3, 52.5; MS (ESI)  $m/e$  318.1 (M<sup>+</sup>+NH<sub>4</sub>); HRMS (ESI) for C<sub>21</sub>H<sub>20</sub>NO<sub>2</sub> (M<sup>+</sup>+NH<sub>4</sub>): 318.1489, Found: 318.1496.

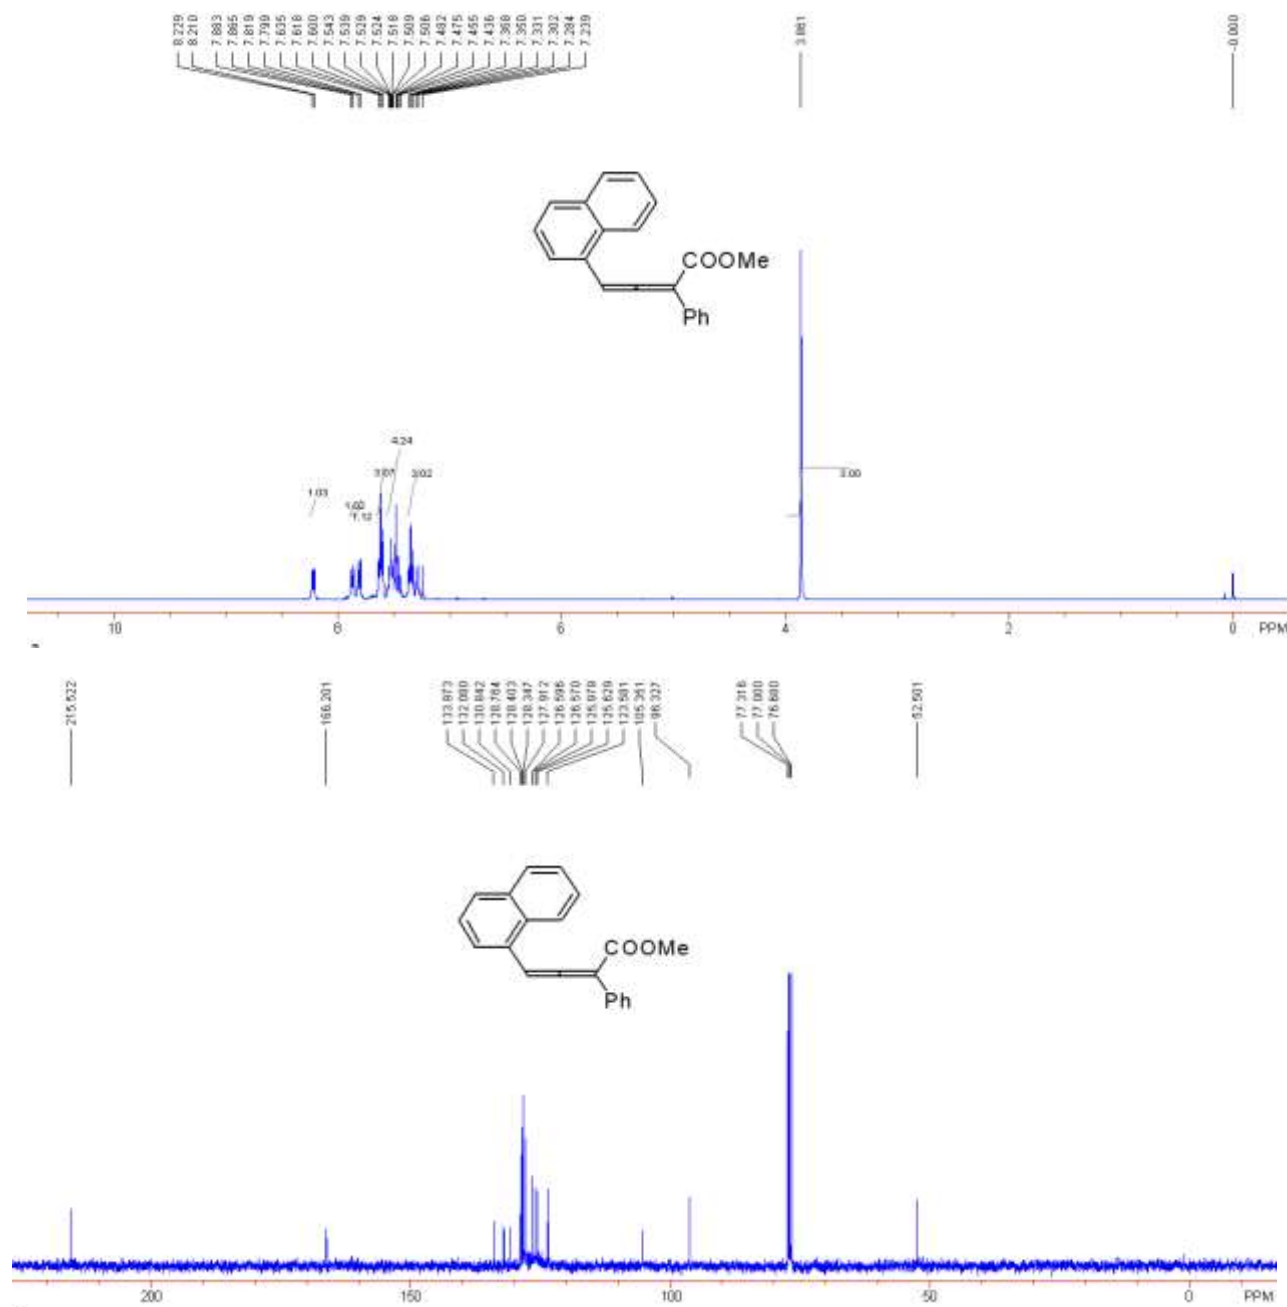



Chemical structure: COC(=O)C=Cc1ccc2cc3ccccc3cc2c1

<sup>1</sup>H NMR spectrum (CDCl<sub>3</sub>) showing peaks at 8.706, 8.699, 8.622, 8.602, 8.592, 8.272, 7.849, 7.835, 7.815, 7.875, 7.853, 7.649, 7.628, 7.608, 7.590, 7.568, 7.550, 7.522, 7.450, 7.370, 7.252, 7.333, 7.298, 7.200, 7.261, 3.873, and 0.010 ppm.

Integration values: 1.0317, 1.00, 1.00, 1.00, 2.15, 2.89.

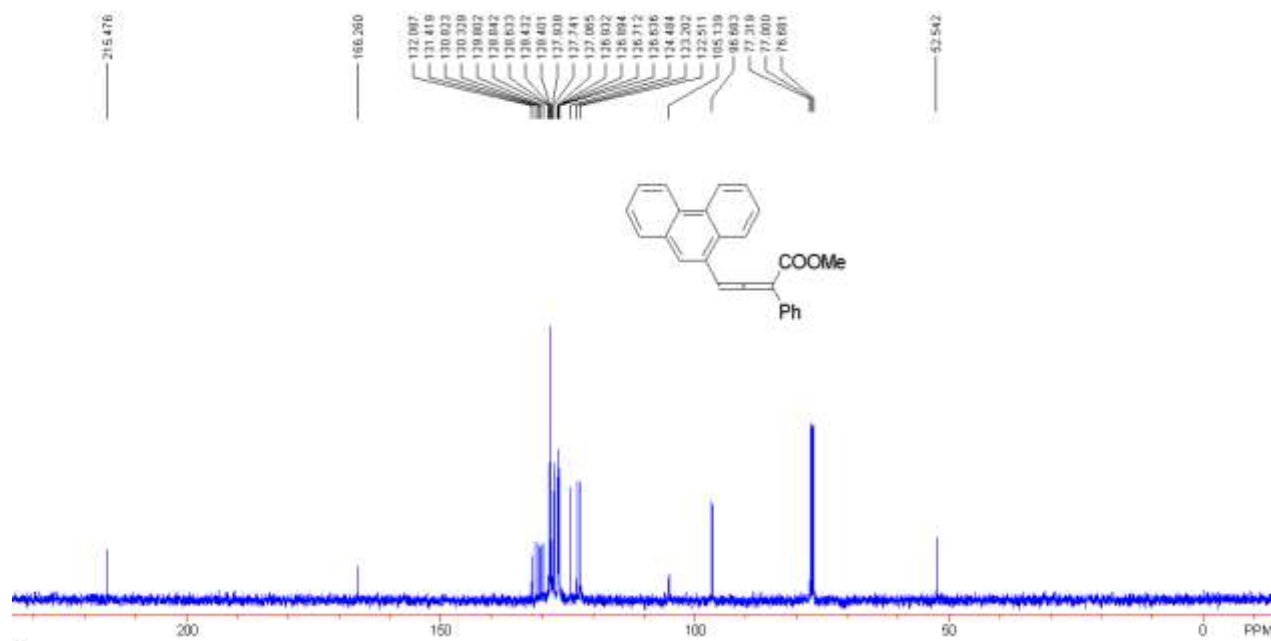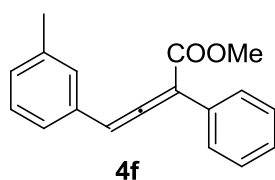

**methyl 2-phenyl-4-m-tolylbuta-2,3-dienoate 4f:** Following the general procedure, the mixture was purified by column chromatography using silica gel to give the target product **4f** (46 mg, 87% yield). A yellow oil. IR (CH<sub>2</sub>Cl<sub>2</sub>):  $\nu$  2962, 1731, 1600, 1490, 1432, 1260, 1230, 1090, 1017, 798 cm<sup>-1</sup>; <sup>1</sup>H NMR (400 MHz, CDCl<sub>3</sub>, TMS):  $\delta$  7.57 (2H, d,  $J$  = 8.0 Hz), 7.36-7.22 (4H, m), 7.17 (2H, d,  $J$  = 6.4 Hz), 7.09 (1H, d,  $J$  = 7.6 Hz), 6.78 (1H, s), 3.82 (3H, s), 2.34 (3H, s); <sup>13</sup>C NMR (CDCl<sub>3</sub>, 100 MHz):  $\delta$  214.6, 166.0, 138.7, 132.1, 131.4, 129.0, 128.8, 128.4, 128.3, 128.0, 127.9, 124.6, 106.3, 99.6, 52.5, 21.3; MS (%)  $m/e$  264 (55), 249 (30), 221 (19), 205 (100), 189 (36), 178 (16), 165 (6), 119 (24); HRMS (EI) for C<sub>18</sub>H<sub>16</sub>O<sub>2</sub>: 264.1150; Found: 264.1147.

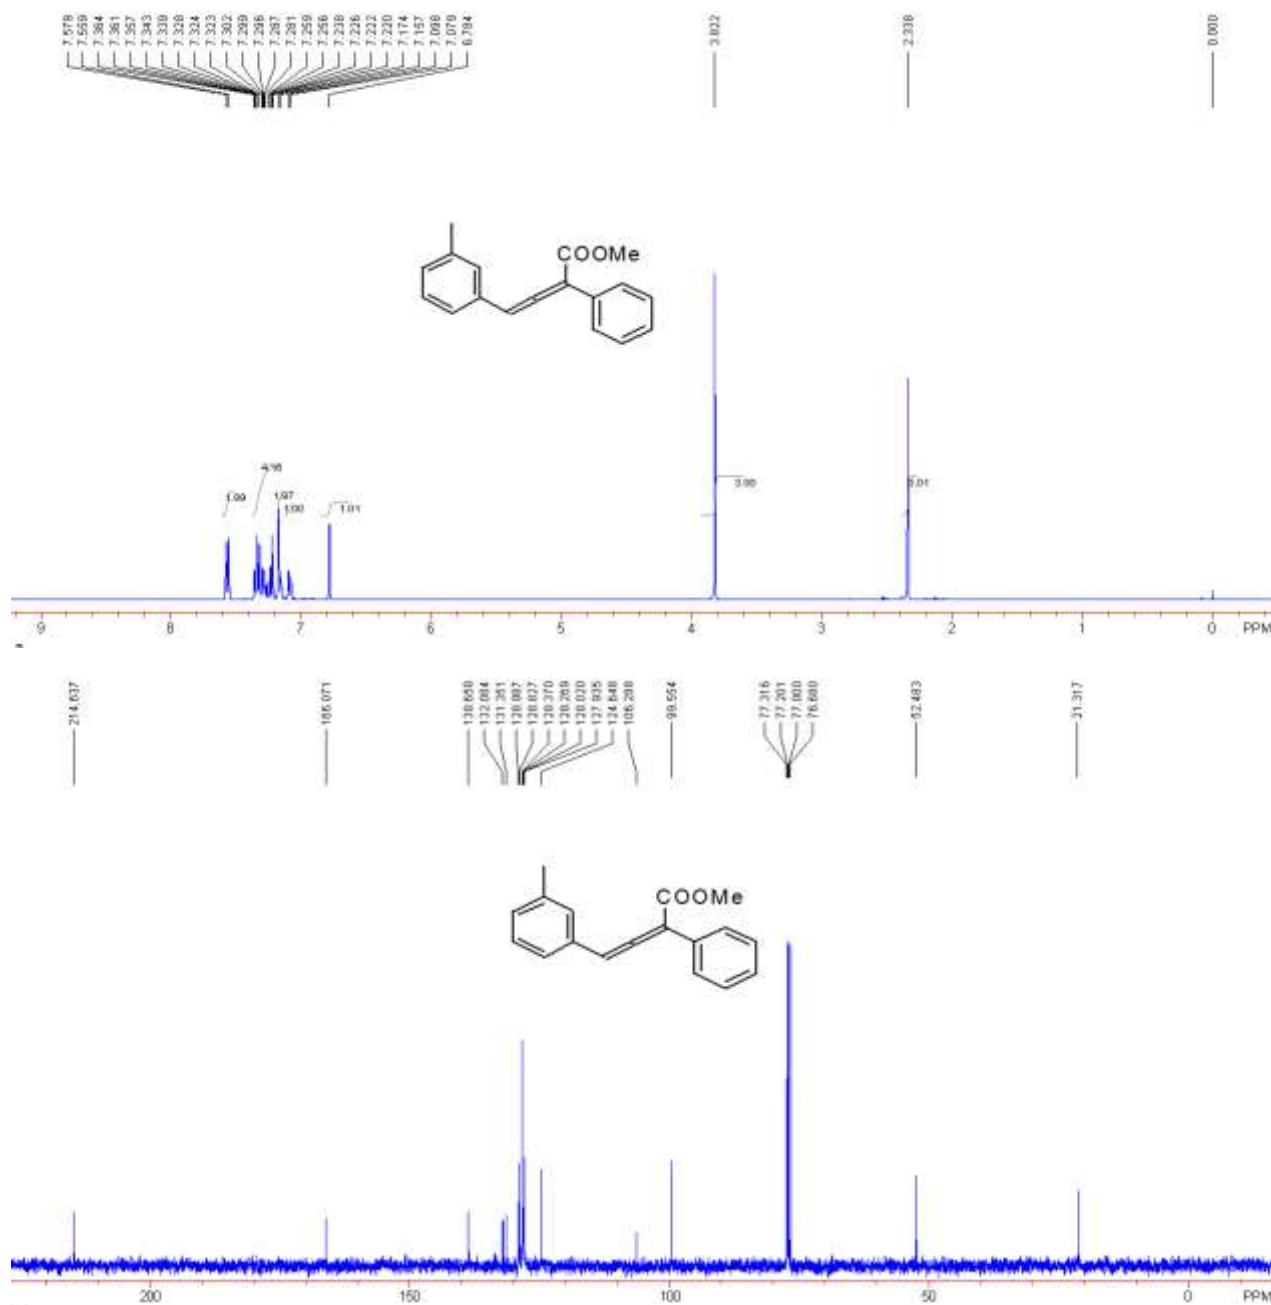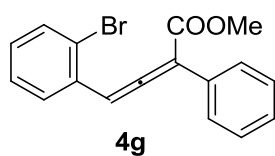

**methyl 4-(3-bromophenyl)-2-phenylbuta-2,3-dienoate **4g**:** Following the general procedure, the mixture was purified by column chromatography using silica gel to give the target product **4g** (60 mg, 91% yield). A yellow oil. IR (CH<sub>2</sub>Cl<sub>2</sub>):  $\nu$  2950, 1932, 1719, 1493, 1473, 1435, 1265, 1215, 1038, 1019, 908, 797, 733 cm<sup>-1</sup>; <sup>1</sup>H NMR (400 MHz, CDCl<sub>3</sub>, TMS):  $\delta$  7.59-7.54 (3H, m), 7.49 (1H, dd,  $J_1$  = 8.0 Hz,  $J_2$  = 2.0 Hz), 7.38-7.23 (5H, m), 7.13-7.09 (1H, m), 3.84 (3H, s); <sup>13</sup>C NMR (CDCl<sub>3</sub>, 100 MHz):  $\delta$  215.2, 165.8, 133.2, 131.5, 131.4, 129.4, 129.0, 128.4, 128.3, 128.1, 127.7, 123.0, 106.6,

98.6, 52.6; MS (%)  $m/e$  328 (11), 313 (6), 269 (41), 249 (89), 234 (22), 206 (6), 189 (100), 163 (14), 94 (14); HRMS (EI) for  $C_{17}H_{13}BrO_2$ : 328.0099; Found: 328.0101.

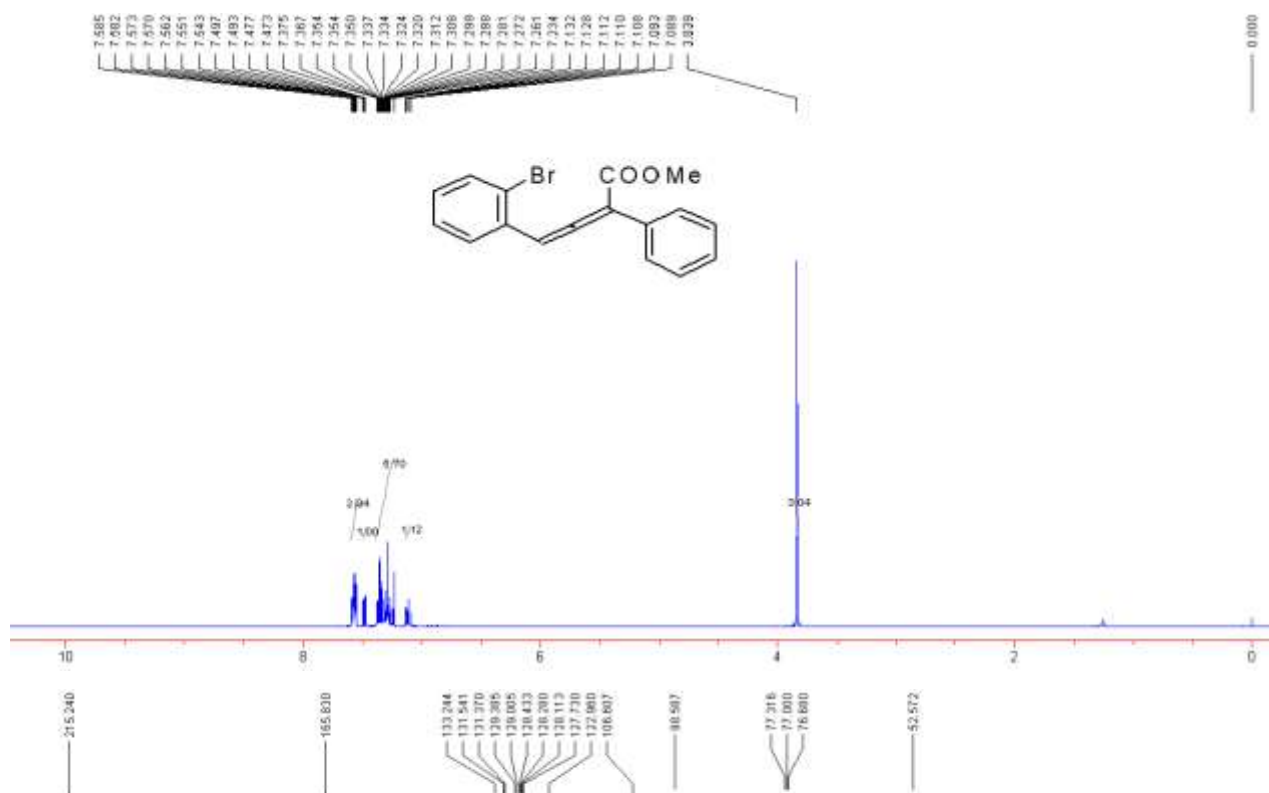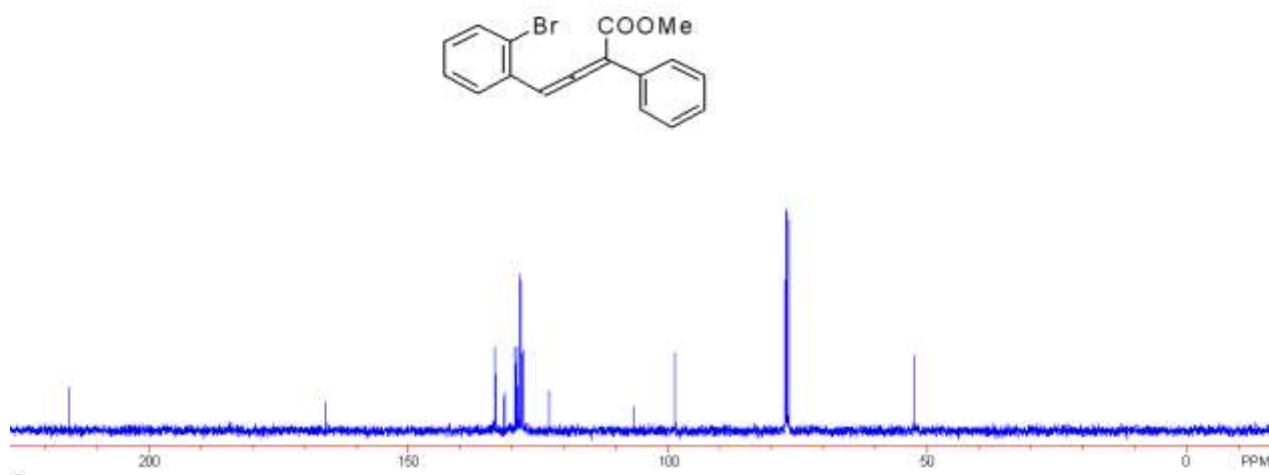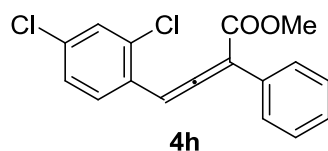

**methyl 4-(2,4-dichlorophenyl)-2-phenylbuta-2,3-dienoate 4h:** Following the general procedure, the mixture was purified by column chromatography using silica gel to give the target product **4h** (53mg, 83% yield). A yellow oil. IR (CH<sub>2</sub>Cl<sub>2</sub>):  $\nu$  2961, 1935, 1726, 1582, 1467, 1433, 1261, 1097, 1016, 864, 797, 734 cm<sup>-1</sup>; <sup>1</sup>H NMR (400 MHz, CDCl<sub>3</sub>, TMS):  $\delta$  7.54 (2H, d,  $J$  = 7.6 Hz), 7.41-7.30

(5H, m), 7.21-7.18 (2H, m), 3.84 (3H, s);  $^{13}\text{C}$  NMR ( $\text{CDCl}_3$ , 100 MHz):  $\delta$  215.2, 165.6, 134.2, 133.8, 133.6, 133.1, 131.3, 129.7, 129.6, 128.5, 128.3, 128.2, 127.6, 106.9, 95.3, 52.6; MS (%)  $m/e$  318 (40), 303 (15), 283 (53), 277 (31), 259 (100), 248 (17), 223 (22), 205 (22), 189 (64), 183 (17), 173 (25); HRMS (EI) for  $\text{C}_{17}\text{H}_{12}\text{Cl}_2\text{O}_2$ : 318.0214; Found: 318.0213.

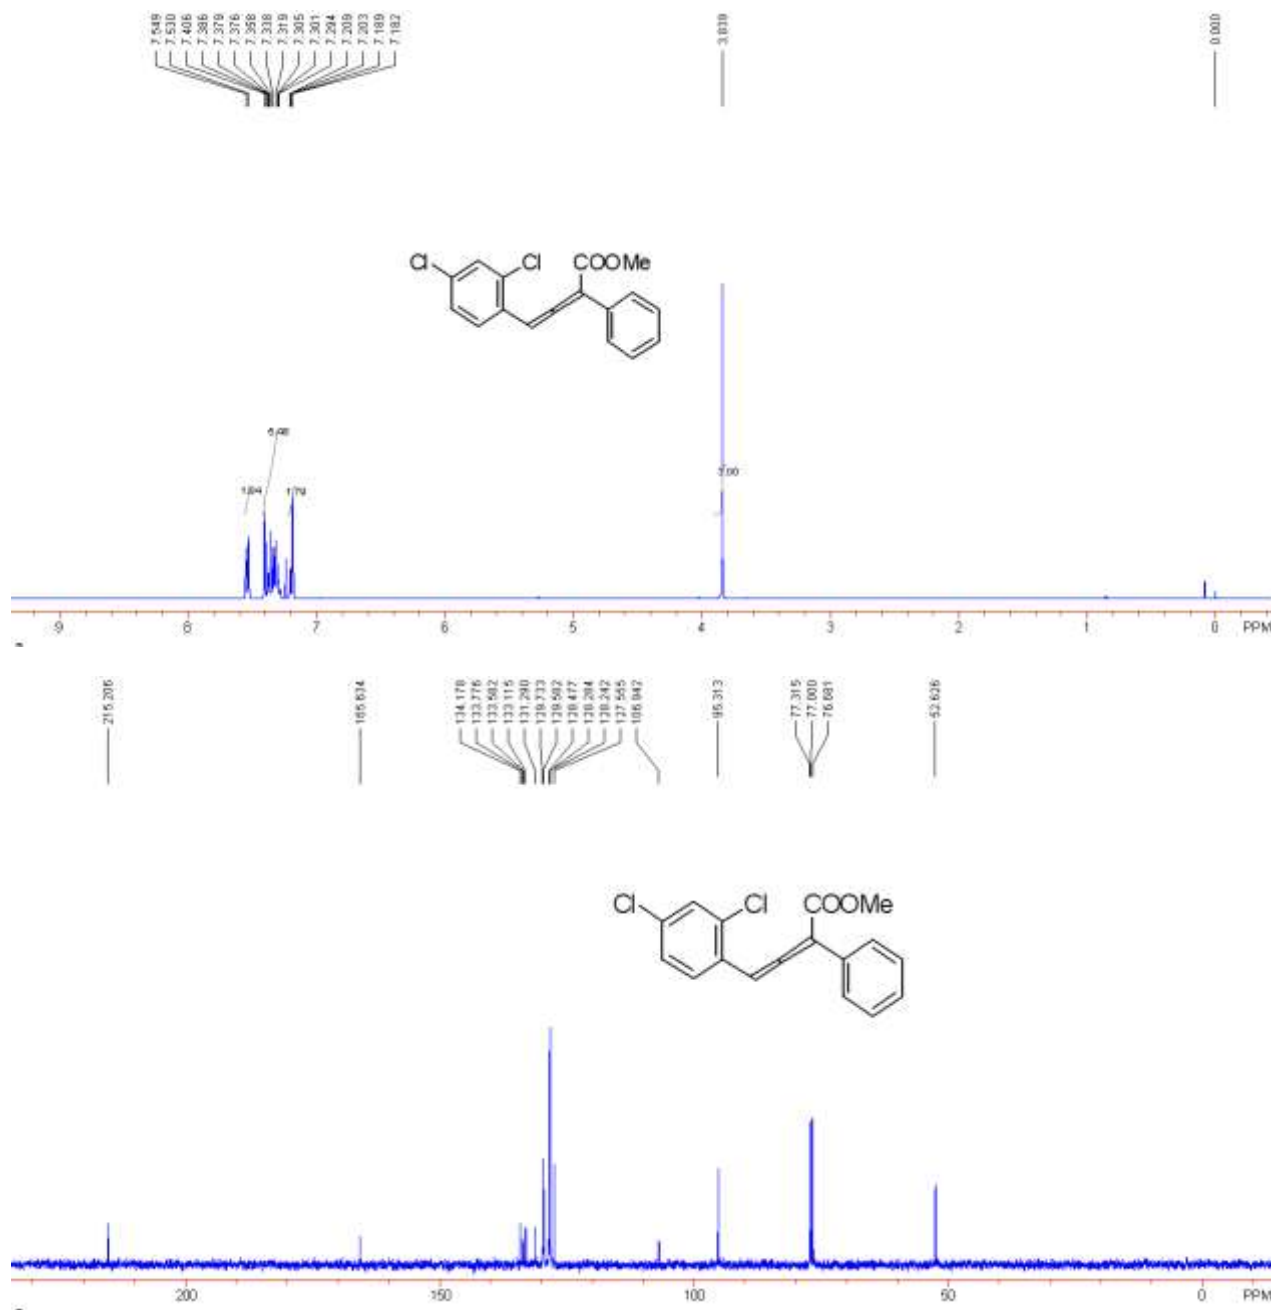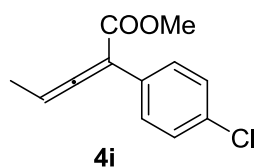

**methyl 2-(4-chlorophenyl)penta-2,3-dienoate 4i:** Following the general procedure, the mixture

was purified by column chromatography using silica gel to give the target product **4i** (40 mg, 90% yield). A yellow solid. m.p. for **4i** = 52-54 °C. IR (CH<sub>2</sub>Cl<sub>2</sub>):  $\nu$  2961, 1946, 1717, 1491, 1434, 1371, 1281, 1260, 1220, 1144, 1091, 1012, 897, 863, 792, 733 cm<sup>-1</sup>; <sup>1</sup>H NMR (400 MHz, CDCl<sub>3</sub>, TMS):  $\delta$  7.43 (2H, d,  $J$  = 8.8 Hz), 7.30 (2H, d,  $J$  = 8.0 Hz), 5.80 (1H, dd,  $J_1$  = 14.8 Hz,  $J_2$  = 7.6 Hz), 3.81 (3H, s), 1.87 (3H, d,  $J$  = 7.6 Hz); <sup>13</sup>C NMR (CDCl<sub>3</sub>, 100 MHz):  $\delta$  212.2, 166.6, 133.3, 131.5, 129.7, 128.3, 101.5, 91.4, 52.3, 13.1; MS (%)  $m/e$  222 (51), 207 (15), 190 (23), 163 (57), 128 (100), 115 (17), 101 (19), 75 (21), 43 (44); HRMS (EI) for C<sub>12</sub>H<sub>11</sub>ClO<sub>2</sub>: 222.0448; Found: 222.0443.

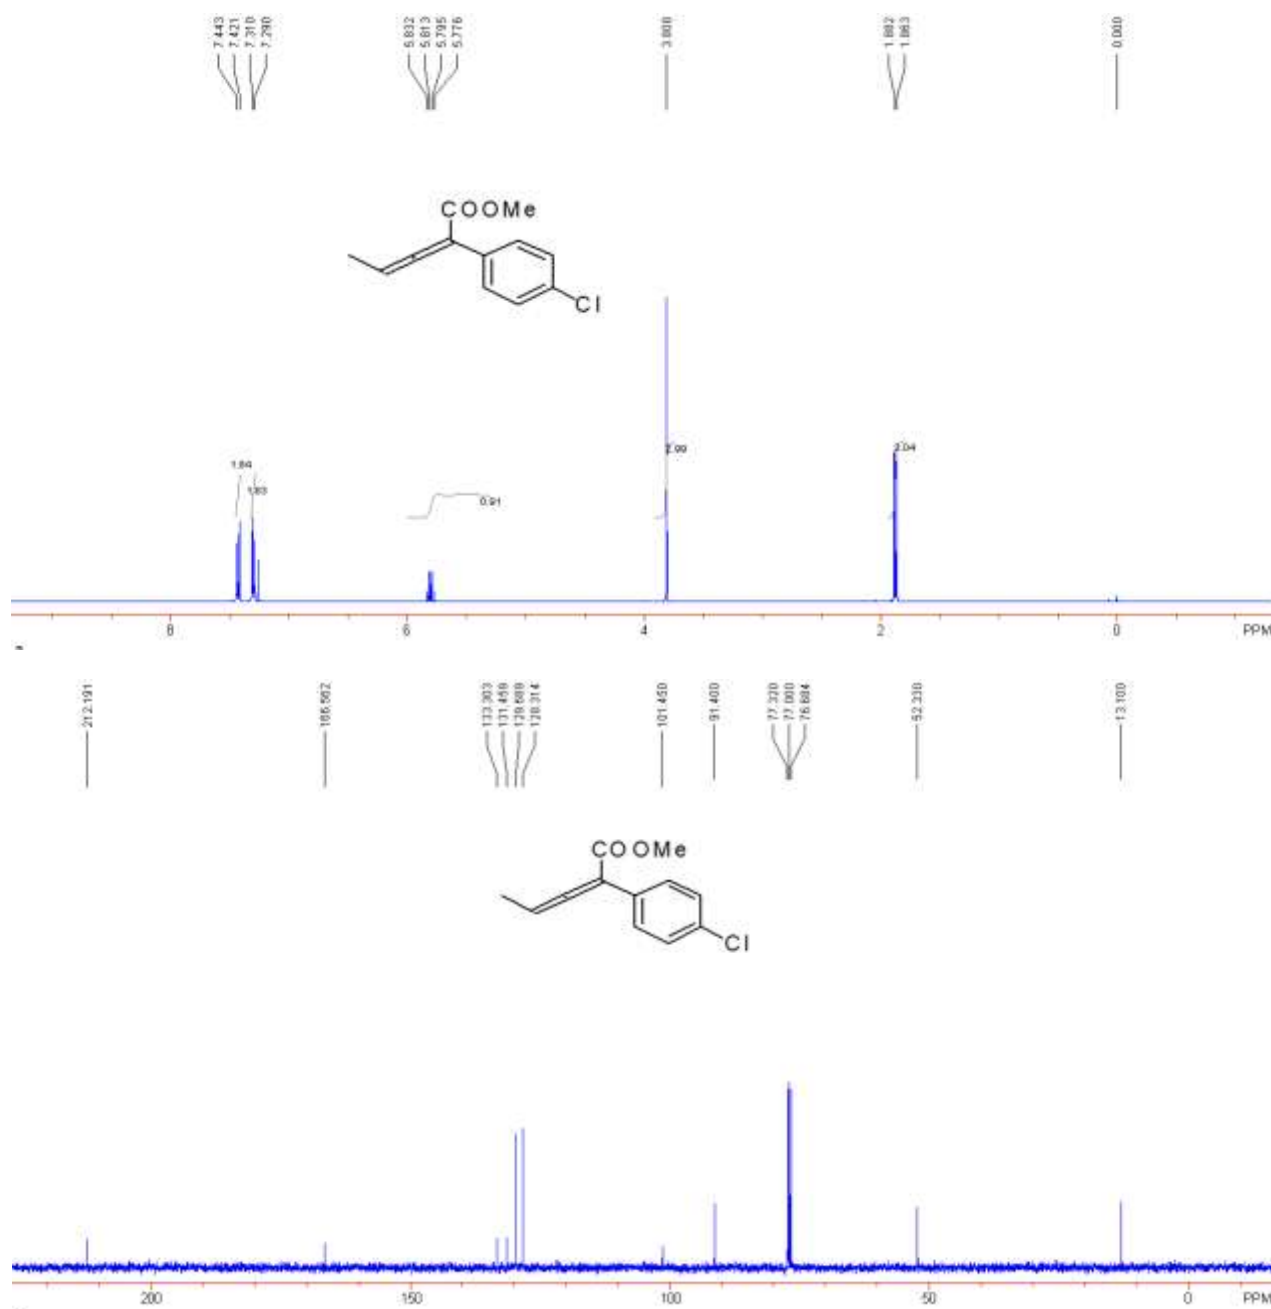

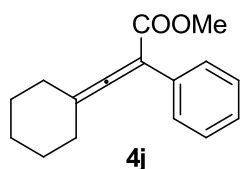

**methyl 3-cyclohexylidene-2-phenylacrylate 4j:** Following the general procedure, the mixture was purified by column chromatography using silica gel to give the target product **4j** (38 mg, 79% yield). A colorless oil. IR (CH<sub>2</sub>Cl<sub>2</sub>):  $\nu$  2931, 2854, 1949, 1713, 1492, 1434, 1264, 1224, 1192, 1165, 1092, 1040, 896, 784, 733, 694 cm<sup>-1</sup>; <sup>1</sup>H NMR (400 MHz, CDCl<sub>3</sub>, TMS):  $\delta$  7.48 (2H, d,  $J$  = 7.2 Hz), 7.33 (2H, t,  $J$  = 7.2 Hz), 7.24 (1H, t,  $J$  = 7.2 Hz), 3.79 (3H, s), 2.31 (4H, t,  $J$  = 6.0 Hz), 1.77-1.54 (6H, m); <sup>13</sup>C NMR (CDCl<sub>3</sub>, 100 MHz):  $\delta$  206.5, 167.3, 134.1, 128.3, 128.0, 127.0, 107.3, 100.3, 52.0, 30.3, 27.0, 25.7; MS (%)  $m/e$  242 (85), 227 (11), 213 (90), 201 (10), 183 (54), 167 (17), 155 (49), 141 (100), 129 (30), 115 (80), 91 (35); HRMS (EI) for C<sub>16</sub>H<sub>18</sub>O<sub>2</sub>: 242.1307; Found: 242.1303.

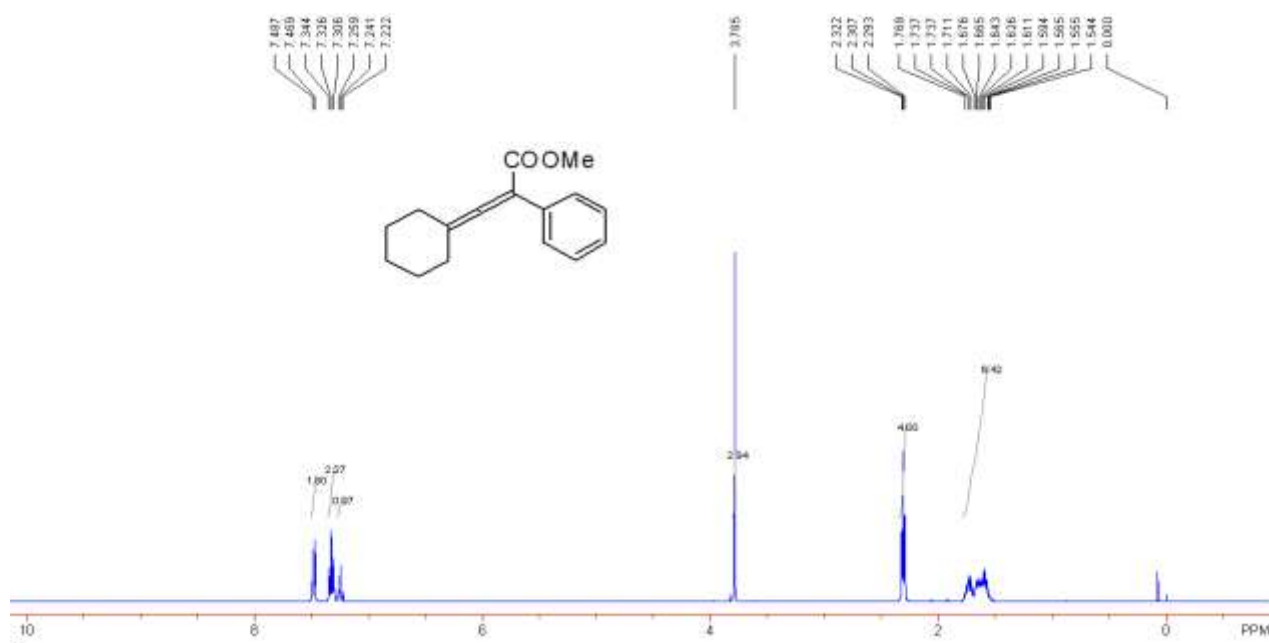

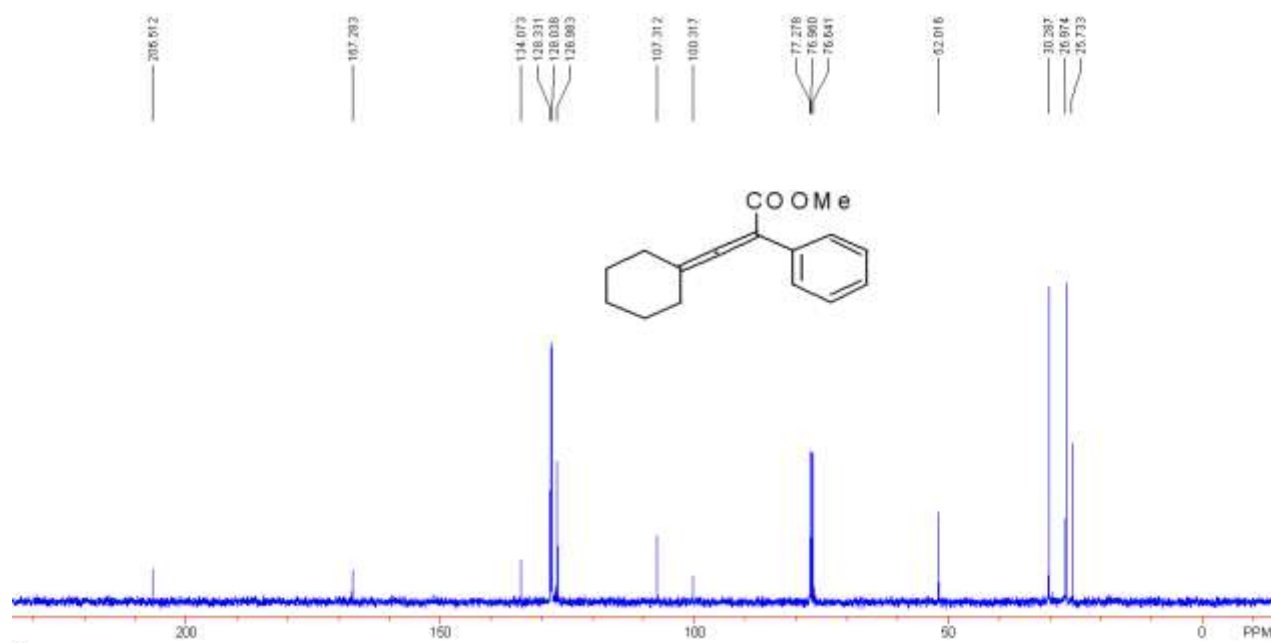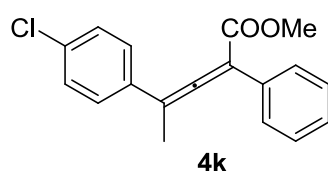

**methyl 4-(4-chlorophenyl)-2-phenylpenta-2,3-dienoate 4k**: Following the general procedure, the mixture was purified by column chromatography using silica gel to give the target product **4k** (17 mg, 57% yield). A white solid. m.p. for **4k** = 108-109 °C. IR (CH<sub>2</sub>Cl<sub>2</sub>):  $\nu$  2962, 1925, 1718, 1488, 1434, 1260, 1196, 1171, 1091, 1015, 865, 793, 739 cm<sup>-1</sup>; <sup>1</sup>H NMR (400 MHz, CDCl<sub>3</sub>, TMS):  $\delta$  7.51 (2H, d,  $J$  = 7.6 Hz), 7.38-7.25 (7H, m), 3.82 (3H, s), 2.27 (3H, s); <sup>13</sup>C NMR (CDCl<sub>3</sub>, 100 MHz):  $\delta$  213.5, 166.4, 133.7, 133.1, 132.6, 128.8, 128.4, 128.3, 127.8, 127.4, 105.3, 104.6, 52.4, 16.3; MS (%)  $m/e$  298 (68), 283 (33), 239 (100), 202 (55), 189 (15), 127 (30), 101 (19), 77 (14); HRMS (EI) for C<sub>18</sub>H<sub>15</sub>O<sub>2</sub>Cl: 298.0761; Found: 298.0760.



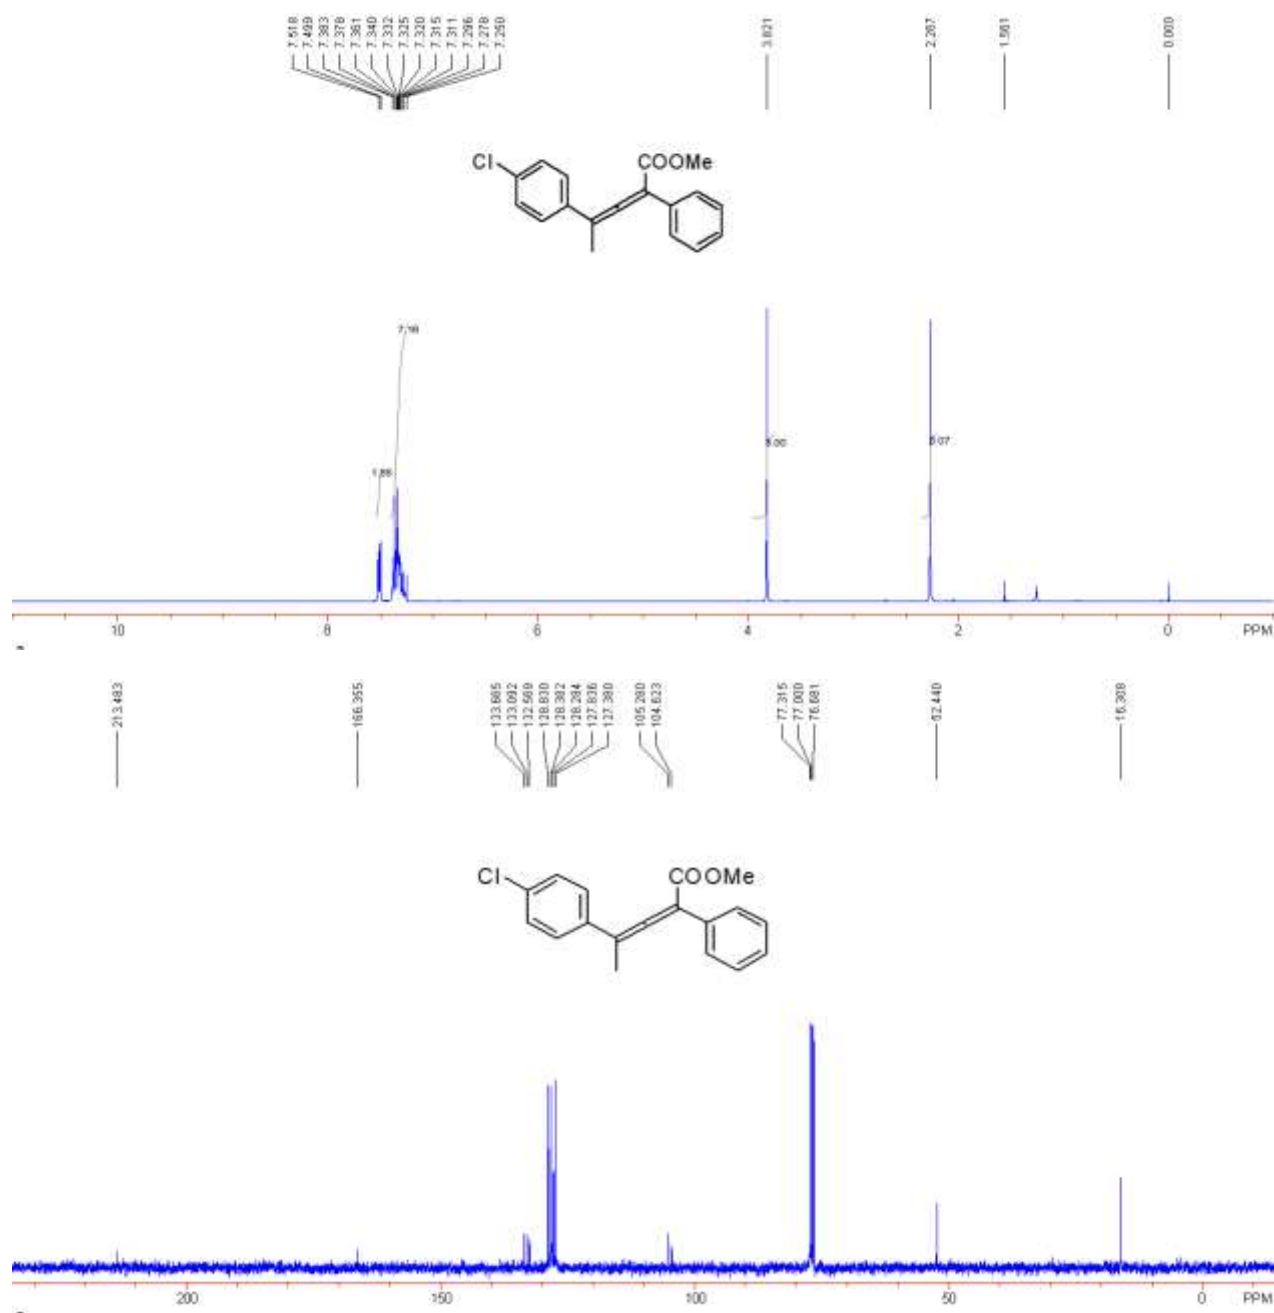

## HPLC spectra:

## HPLC REPORT

Sample Name: zz-21-56

Date: #####

Column: AD-H

Mobile Phase: hex/ipr = 95/5

Velocity (mL/min): 0.4

Detection Wavelength (nm): 230

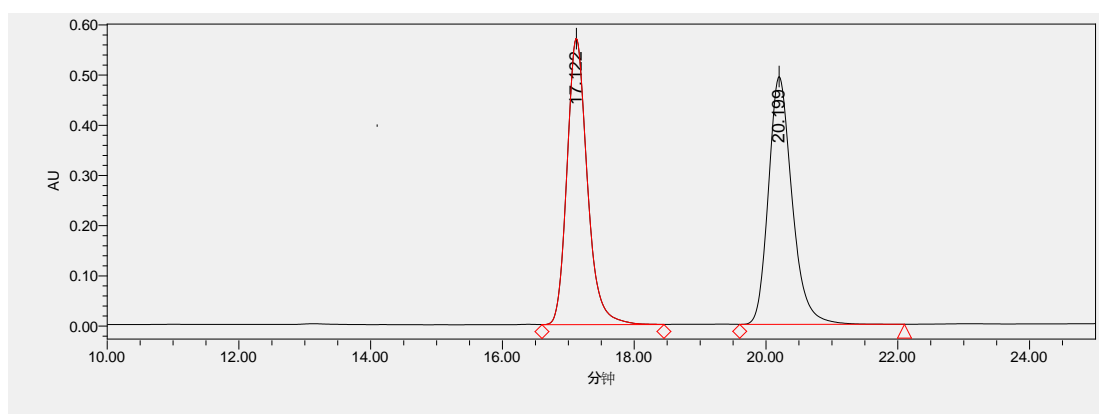

| NO | R. Time | Peak Area | Precent | Peak Height |
|----|---------|-----------|---------|-------------|
| 1  | 17.122  | 12239161  | 48.95   | 570485      |
| 2  | 20.199  | 12313674  | 50.05   | 493742      |

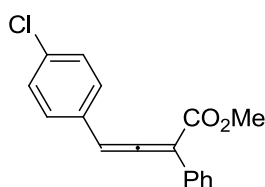

Chiral HPLC report: racemate (**4b**)

## HPLC REPORT

Sample Name: zz-21-56

Date: #####

Column: AD-H

Mobile Phase: hex/ipr = 95/5

Velocity (mL/min): 0.4

Detection Wavelength (nm): 230

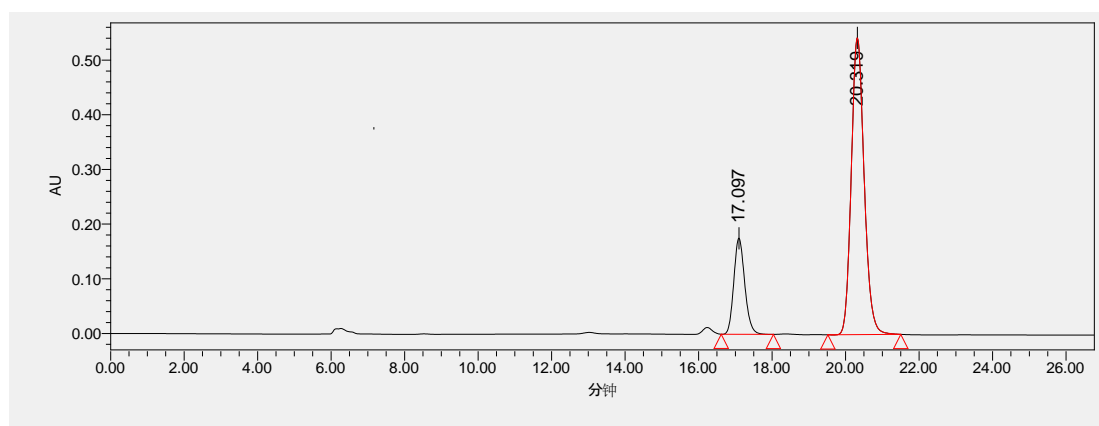

| NO | R. Time | Peak Area | Precent | Peak Height |
|----|---------|-----------|---------|-------------|
| 1  | 17.097  | 3639024   | 21.58   | 175839      |
| 2  | 20.319  | 13327259  | 78.42   | 542934      |

Chiral HPLC report: Enantiomeric excess was determined by HPLC with a Chiralpak AD column;  $\lambda$  = 230 nm; eluent: Hexane/Isopropanol = 95/5; Flow rate: 0.4 mL/min;  $t_{\text{minor}}$  = 17.097 min,  $t_{\text{major}}$  = 20.319 min; ee% = 57.

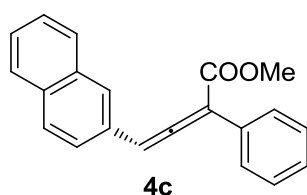

**(S)-methyl 4-(naphthalen-2-yl)-2-phenylbuta-2,3-dienoate 4c:** Following the general procedure, the mixture was purified by column chromatography using silica gel to give the target product **4c** (21 mg, 70% yield). A white solid. m.p. for **4c** = 101-103 °C.  $[\alpha]_D^{20}$  = +42.2 ( $c$  0.7, CH<sub>2</sub>Cl<sub>2</sub>). The ee of the product **4c** was determined to be 71% [determined by HPLC, Chiralpak AD-H, n-hexane/isopropanol = 98:2, 0.4 mL/min,  $\lambda$  = 230 nm,  $t$  (major) = 37.78 min,  $t$  (minor) = 40.49 min].

## HPLC REPORT

Sample Name: yyl-24-36

Date: #####

Column: AD-H

Mobile Phase: hex/ipr = 98/2

Velocity (mL/min): 0.4

Detection Wavelength (nm): 230  
S83

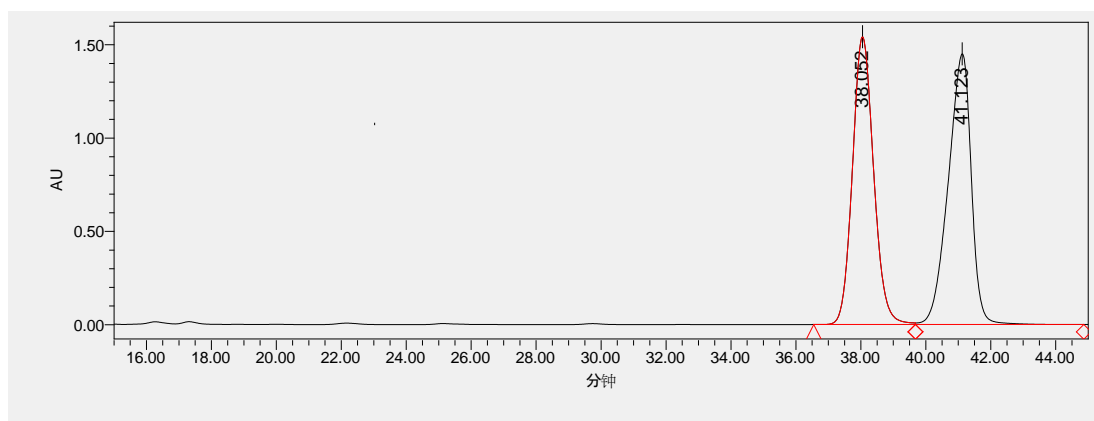

| NO | R. Time | Peak Area | Precent | Peak Height |
|----|---------|-----------|---------|-------------|
| 1  | 38.052  | 69825084  | 49.47   | 1542056     |
| 2  | 41.123  | 71335140  | 50.53   | 1450728     |

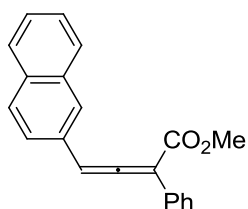

Chiral HPLC report: racemate (**4c**)

## HPLC REPORT

Sample Name: yyl-24-37

Date: ####

Column: AD-H

Mobile Phase: hex/ipr = 98/2

Velocity (mL/min): 0.4

Detection Wavelength (nm): 230

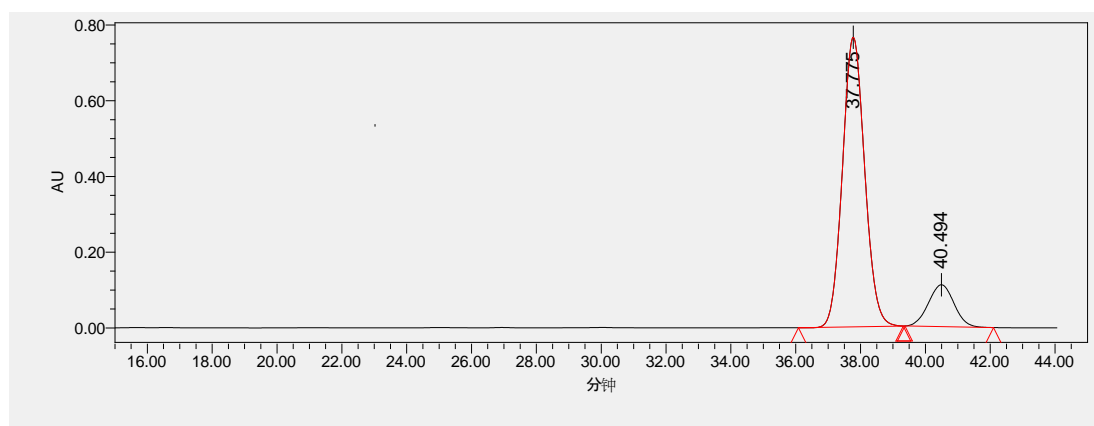

| NO | R. Time | Peak Area | Precent | Peak Height |
|----|---------|-----------|---------|-------------|
| 1  | 37.775  | 36447261  | 85.70   | 764551      |
| 2  | 40.494  | 6080678   | 14.30   | 110686      |

Chiral HPLC report: Enantiomeric excess was determined by HPLC with a Chiralpak AD-H column;  
 $\lambda = 230$  nm; eluent: Hexane/Isopropanol = 98/2; Flow rate: 0.4 mL/min;  $t_{\text{minor}} = 40.494$  min,  $t_{\text{major}} =$   
37.775 min; ee% = 71.

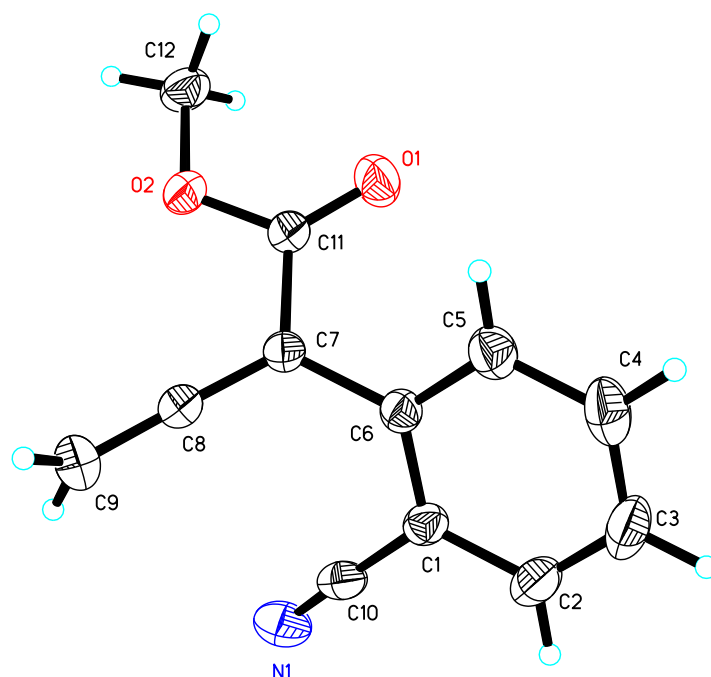

The crystal data of **3j** have been deposited in CCDC with number 917097. Empirical Formula:  $C_{12}H_9NO_2$ ; Formula Weight: 199.20; Crystal Color, Habit: colorless; Crystal Dimensions: 0.311 x 0.186 x 0.079 mm; Crystal System: Monoclinic; Lattice Parameters:  $a = 8.1053(9)\text{\AA}$ ,  $b = 14.1123(16)\text{\AA}$ ,  $c = 9.2252(11)\text{\AA}$ ,  $\alpha = 90^\circ$ ,  $\beta = 97.664(2)^\circ$ ,  $\gamma = 90^\circ$ ,  $V = 1045.8(2)\text{\AA}^3$ ; Space group:  $P2(1)/n$ ;  $Z = 4$ ;  $D_{calc} = 1.265\text{ g/cm}^3$ ;  $F_{000} = 416$ ; Final R indices [ $I > 2\sigma(I)$ ]  $R1 = 0.0475$ ,  $wR2 = 0.1163$ .

## Calculation results

|                                                |                                                                                   |                                                                                    |                                                                                     |
|------------------------------------------------|-----------------------------------------------------------------------------------|------------------------------------------------------------------------------------|-------------------------------------------------------------------------------------|
|                                                | 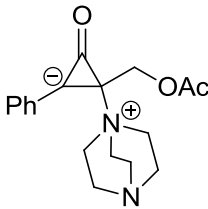 |  |  |
| Relative energy<br>$\Delta H_{298}$ (kcal/mol) | 0.0                                                                               | 3.8                                                                                | unstable                                                                            |

Calculated at mPW1K/6-31+G(d) level
